# Supplementary material
Source: PubMed Central journal article supplement (PMC5736435)

## Supporting information

### **Biphenylthiazole Antibiotics with Oxadiazole Linker: An Approach to Improve the Physicochemical Properties and Oral Bioavailability**

*Mohamed Hagra, <sup>1</sup> Youssef A. Hegazy, <sup>2</sup> Amr H. Elkabbany, <sup>1</sup> Haroon Mohammad, <sup>2</sup> Adel Ghiaty, <sup>1</sup> Tamer M. Abdelghany, <sup>3</sup> Mohamed N. Seleem<sup>2,4</sup> \* and Abdelrahman S. Mayhoub<sup>1,5</sup>\**

<sup>1</sup> Department of Pharmaceutical Organic Chemistry, College of Pharmacy, Al-Azhar University, Cairo 11884, Egypt. E-mail: amayhoub@azhar.edu.eg

<sup>2</sup> Department of Comparative Pathobiology, Purdue University, College of Veterinary Medicine, West Lafayette, IN 47907, USA. E. mail: mseleem@purdue.edu

<sup>3</sup> Department of Pharmacology, College of Pharmacy, Al-Azhar University, Cairo 11884, Egypt

<sup>4</sup> Purdue Institute for Inflammation, Immunology, and Infectious Diseases, West Lafayette, IN 479067, USA.

<sup>5</sup> Biomedical Sciences, University of Science and Technology, Zewail City of Science and Technology, Giza, Egypt

**Table 1S. Minimum inhibitory concentration (MIC,  $\mu\text{g/mL}$ ) of compound 27, vancomycin (VAN), and linezolid (LIN) against drug-resistant *S. aureus*, *Enterococcus faecium*, *Enterococcus faecalis*, and Gram-negative bacterial pathogens.**

| Bacterial strain                             | MIC<br>27 | MIC<br>VAN | MIC<br>LIN |
|----------------------------------------------|-----------|------------|------------|
| <i>S. aureus</i> NRS107 (RN4220)             | 8         | 1          | N.D.       |
| MRSA NRS119                                  | 16        | 1          | >128       |
| MRSA NRS123 (USA400)                         | 16        | 1          | N.D.       |
| MRSA NRS384 (USA300)                         | 16        | 1          | N.D.       |
| VRS10                                        | 16        | >512       | N.D.       |
| VRS11a                                       | 16        | >512       | N.D.       |
| VRS12                                        | 16        | >512       | N.D.       |
| <i>E. faecium</i> ATCC 700221                | >64       | >64        | 1          |
| <i>E. faecalis</i> ATCC 51299                | >64       | 16         | 1          |
| <i>Acinetobacter baumannii</i><br>ATCC 19606 | >64       | N.D.       | >64        |
| <i>Enterobacter cloacae</i> BAA-<br>1154     | >64       | N.D.       | >64        |
| <i>Klebsiella pneumoniae</i> BAA-<br>1706    | >64       | N.D.       | >64        |
| <i>Pseudomonas aeruginosa</i><br>ATCC 15442  | >64       | N.D.       | >64        |

N.D. = Not determined, VRS = vancomycin-resistant *S. aureus*.

**Table 2S. *in vitro* cytotoxicity against Baby hamster kidney fibroblasts (BHK-21) cells.**

| Compound  | IC <sub>50</sub> ( $\mu\text{g/mL}$ ) /Time point |                 |
|-----------|---------------------------------------------------|-----------------|
|           | 6 H                                               | 24 H            |
| <b>22</b> | >1000                                             | 44.96 $\pm$ 3.2 |
| <b>27</b> | 398.2 $\pm$ 8.7                                   | 45.7 $\pm$ 2.6  |

Dr\_AbdelrhmanSaqiha-MOX\_PROTON\_01  
Dr\_AbdelrhmanSaqiha-MOX

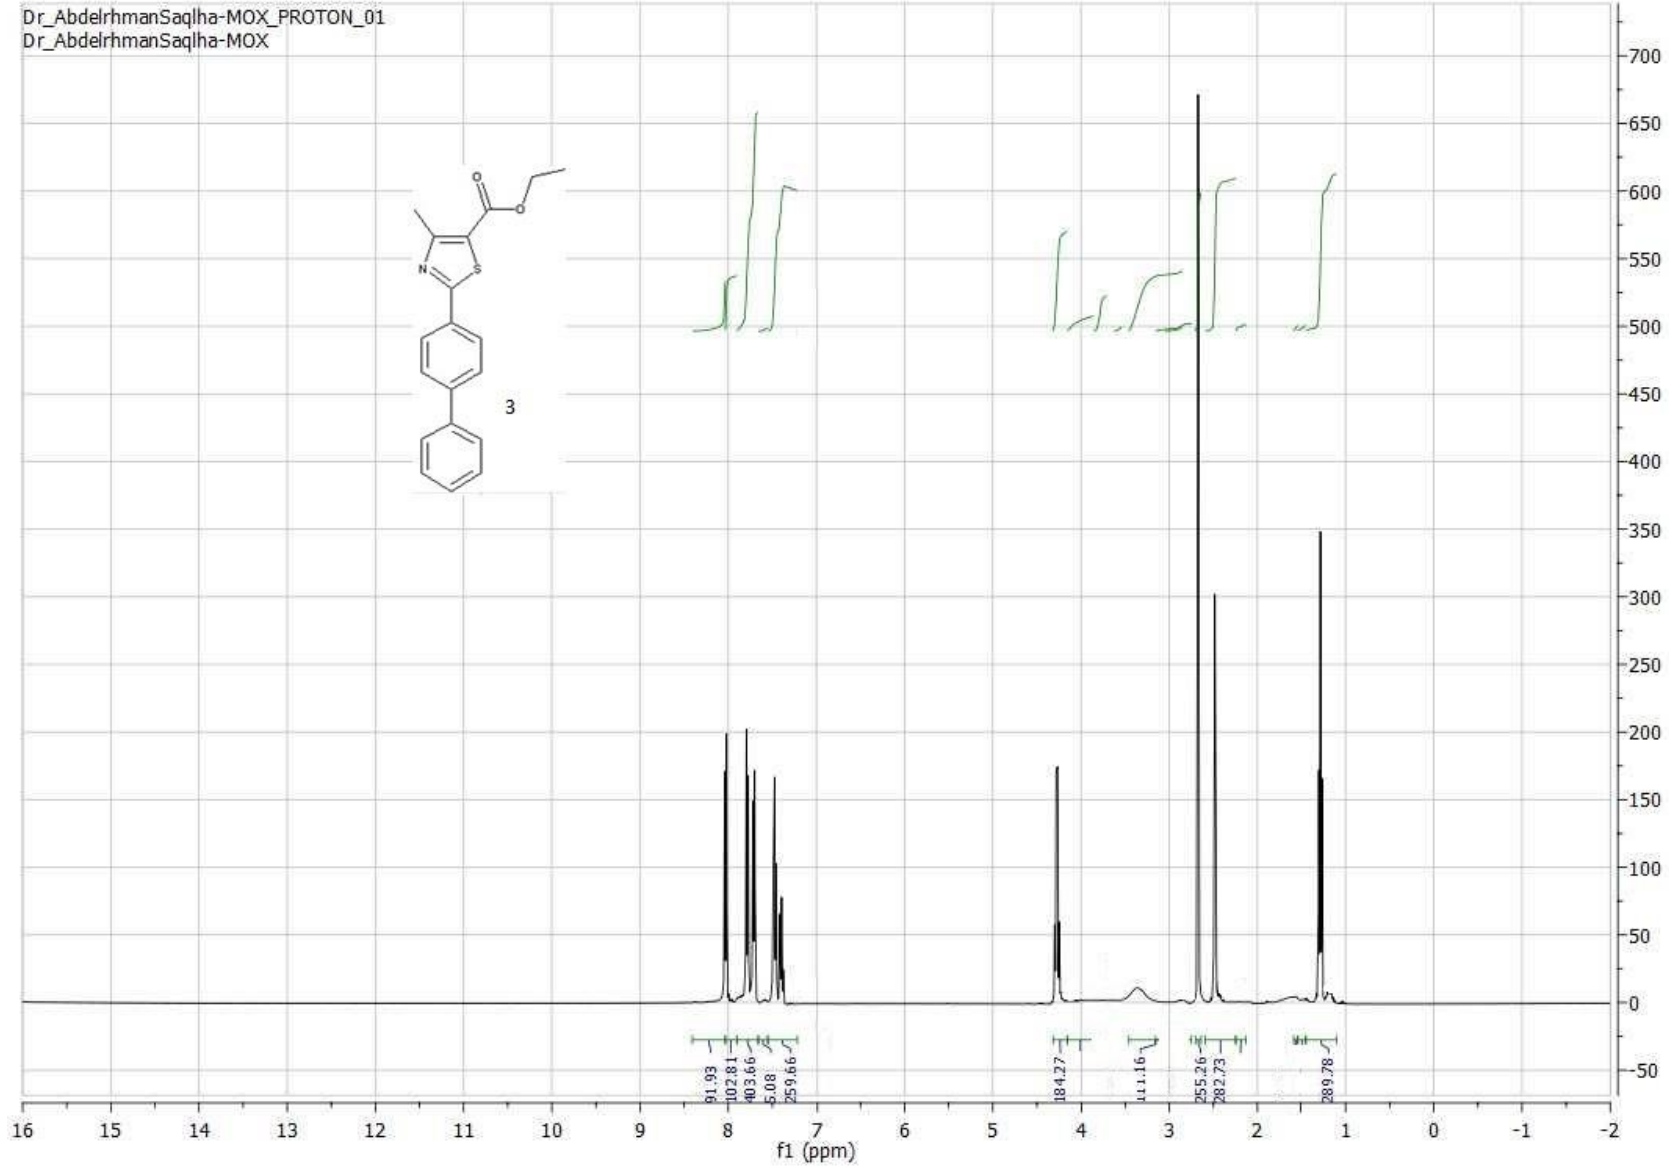

Dr\_AbdelrhmanSaqhha-MOX\_CARBON\_01  
Dr\_AbdelrhmanSaqhha-MOX

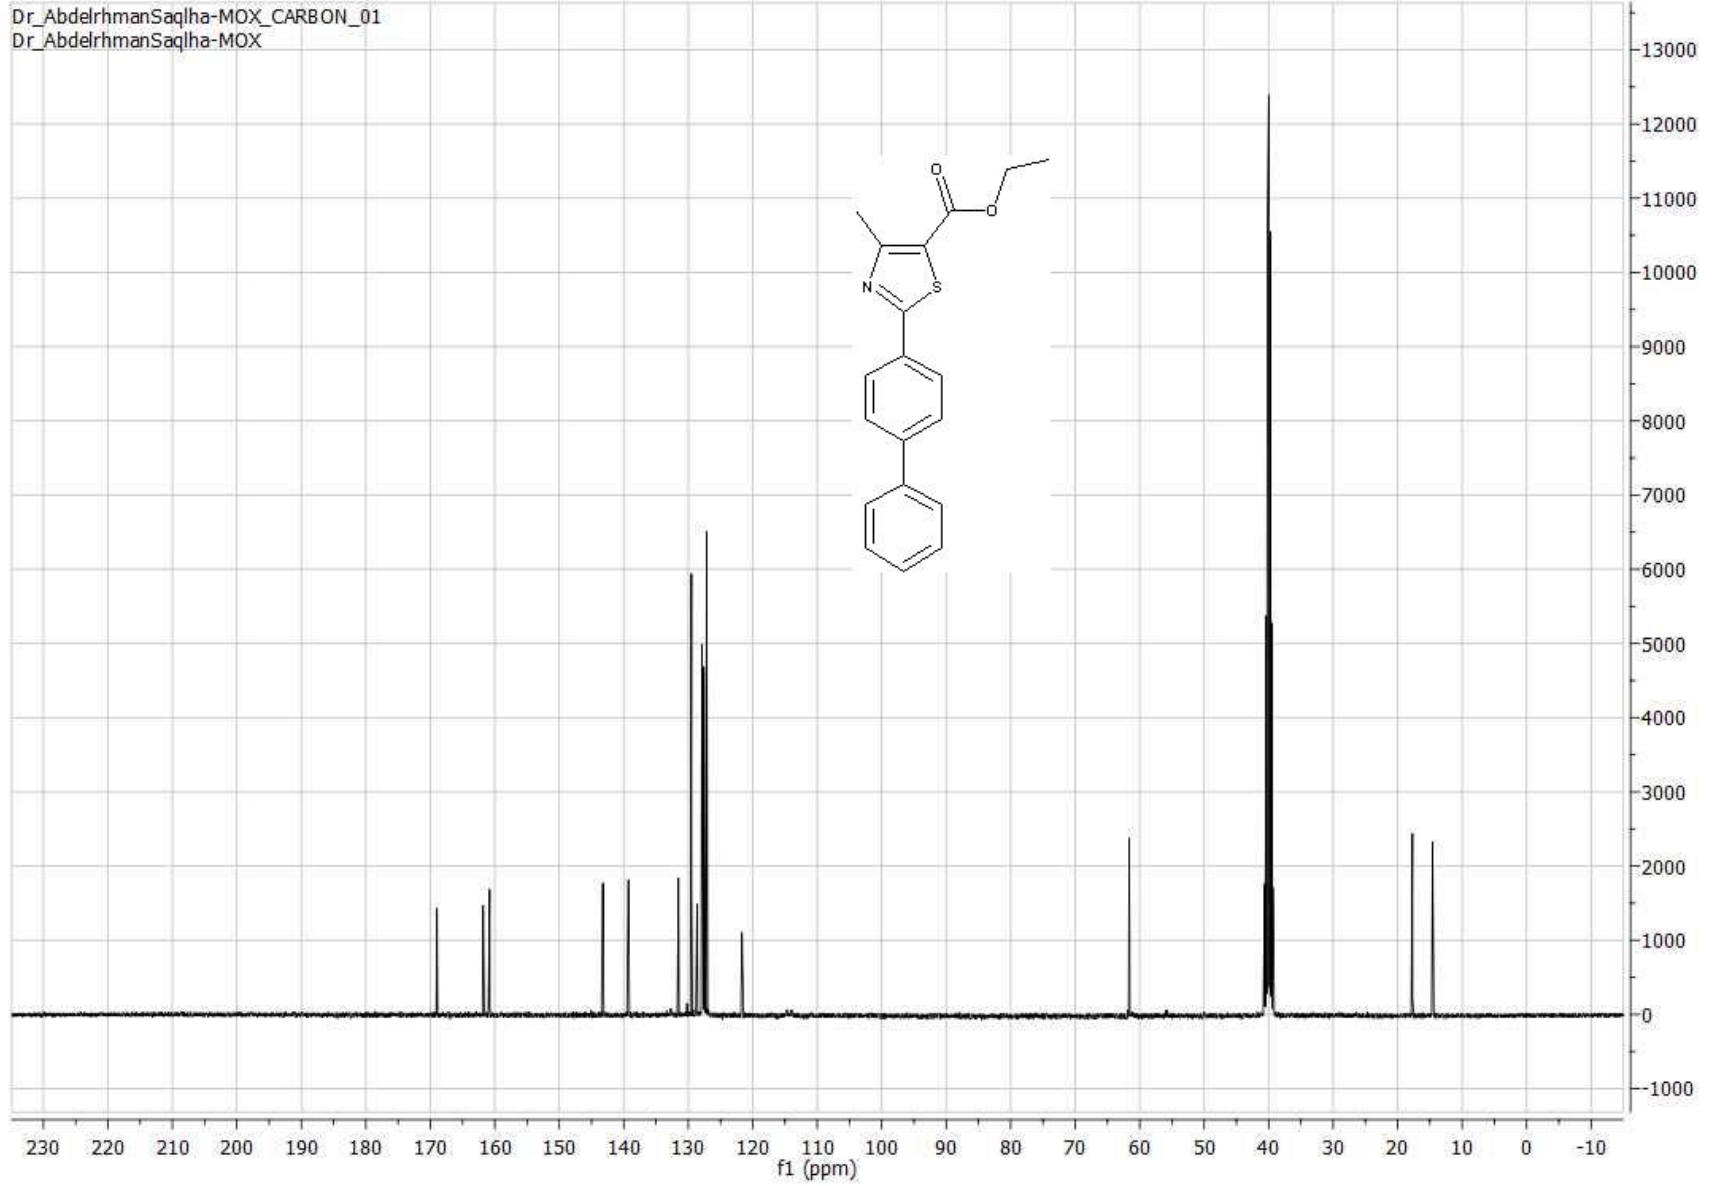

Dr\_EmanYahia-MOX2\_PROTON\_01  
Dr\_EmanYahia-MOX2

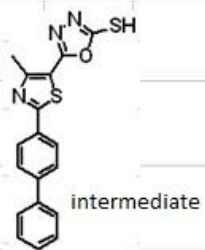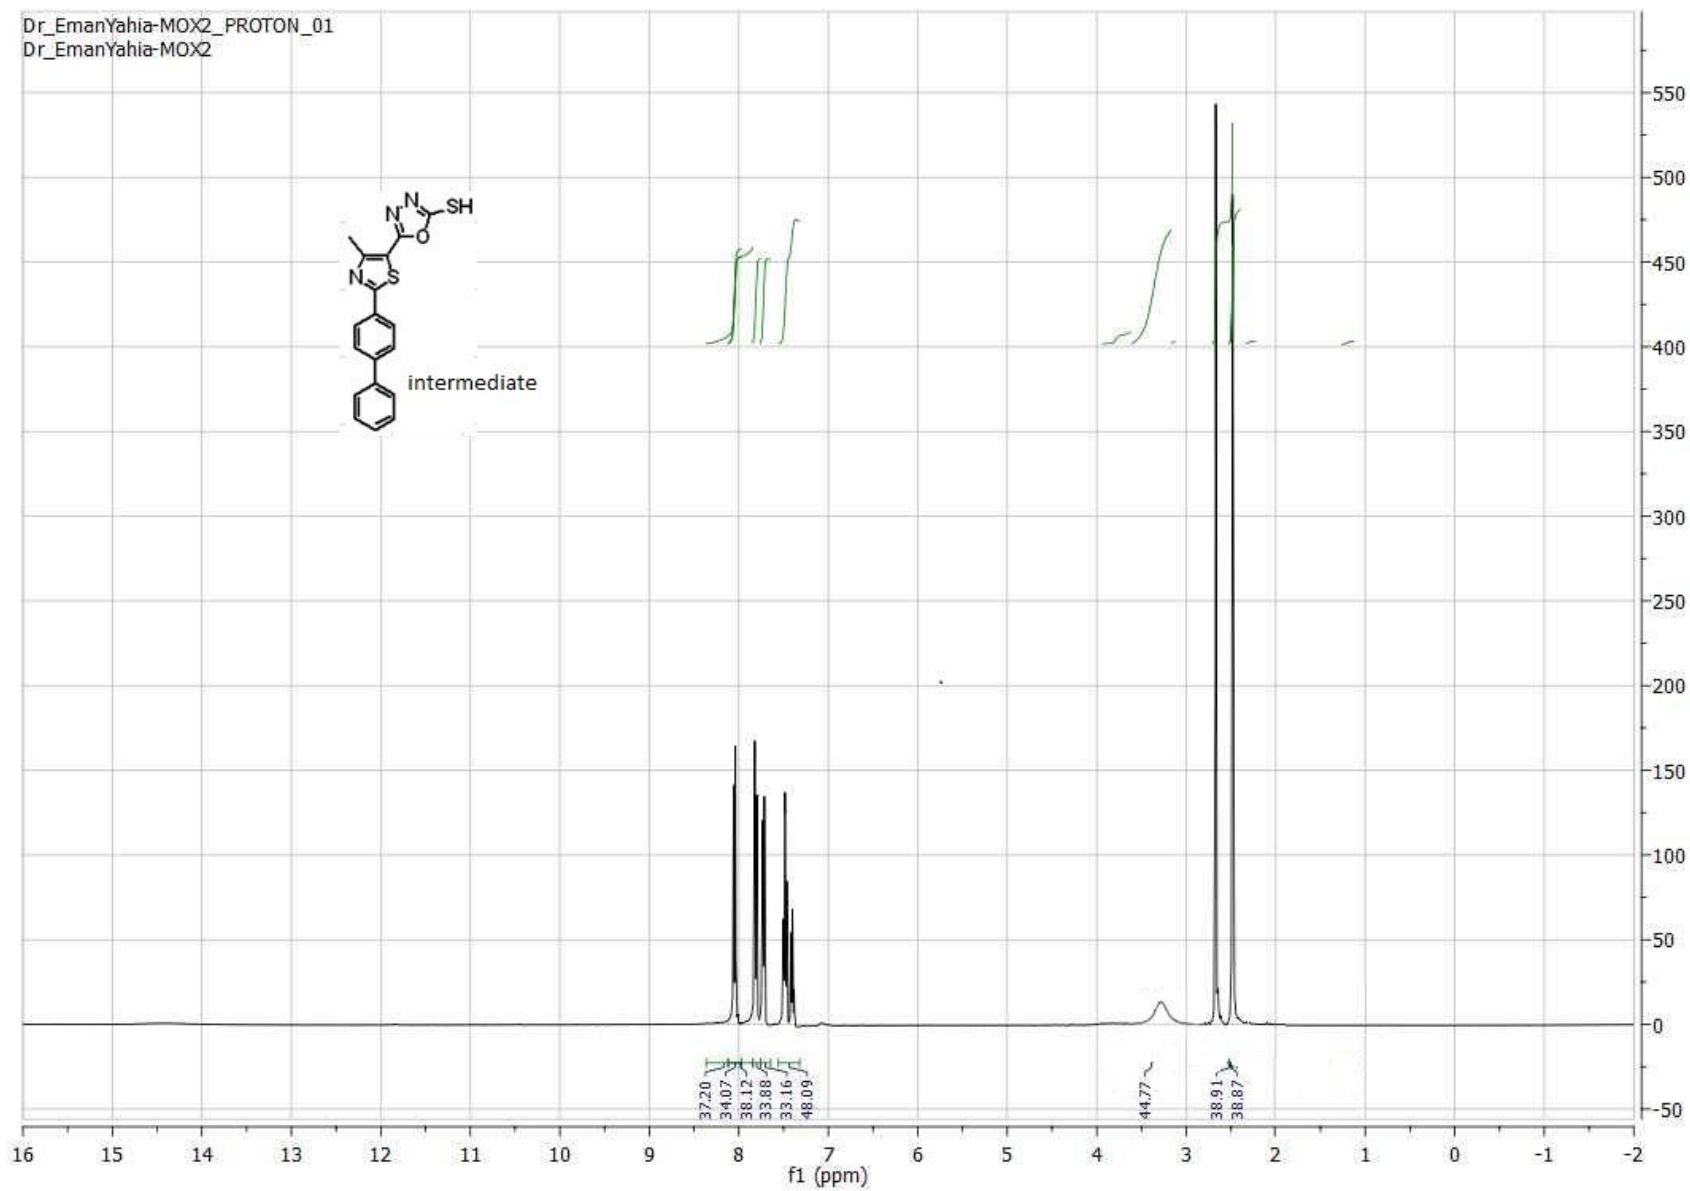

Dr\_EmanYahia-MOX1\_PROTON\_01  
Dr\_EmanYahia-MOX1

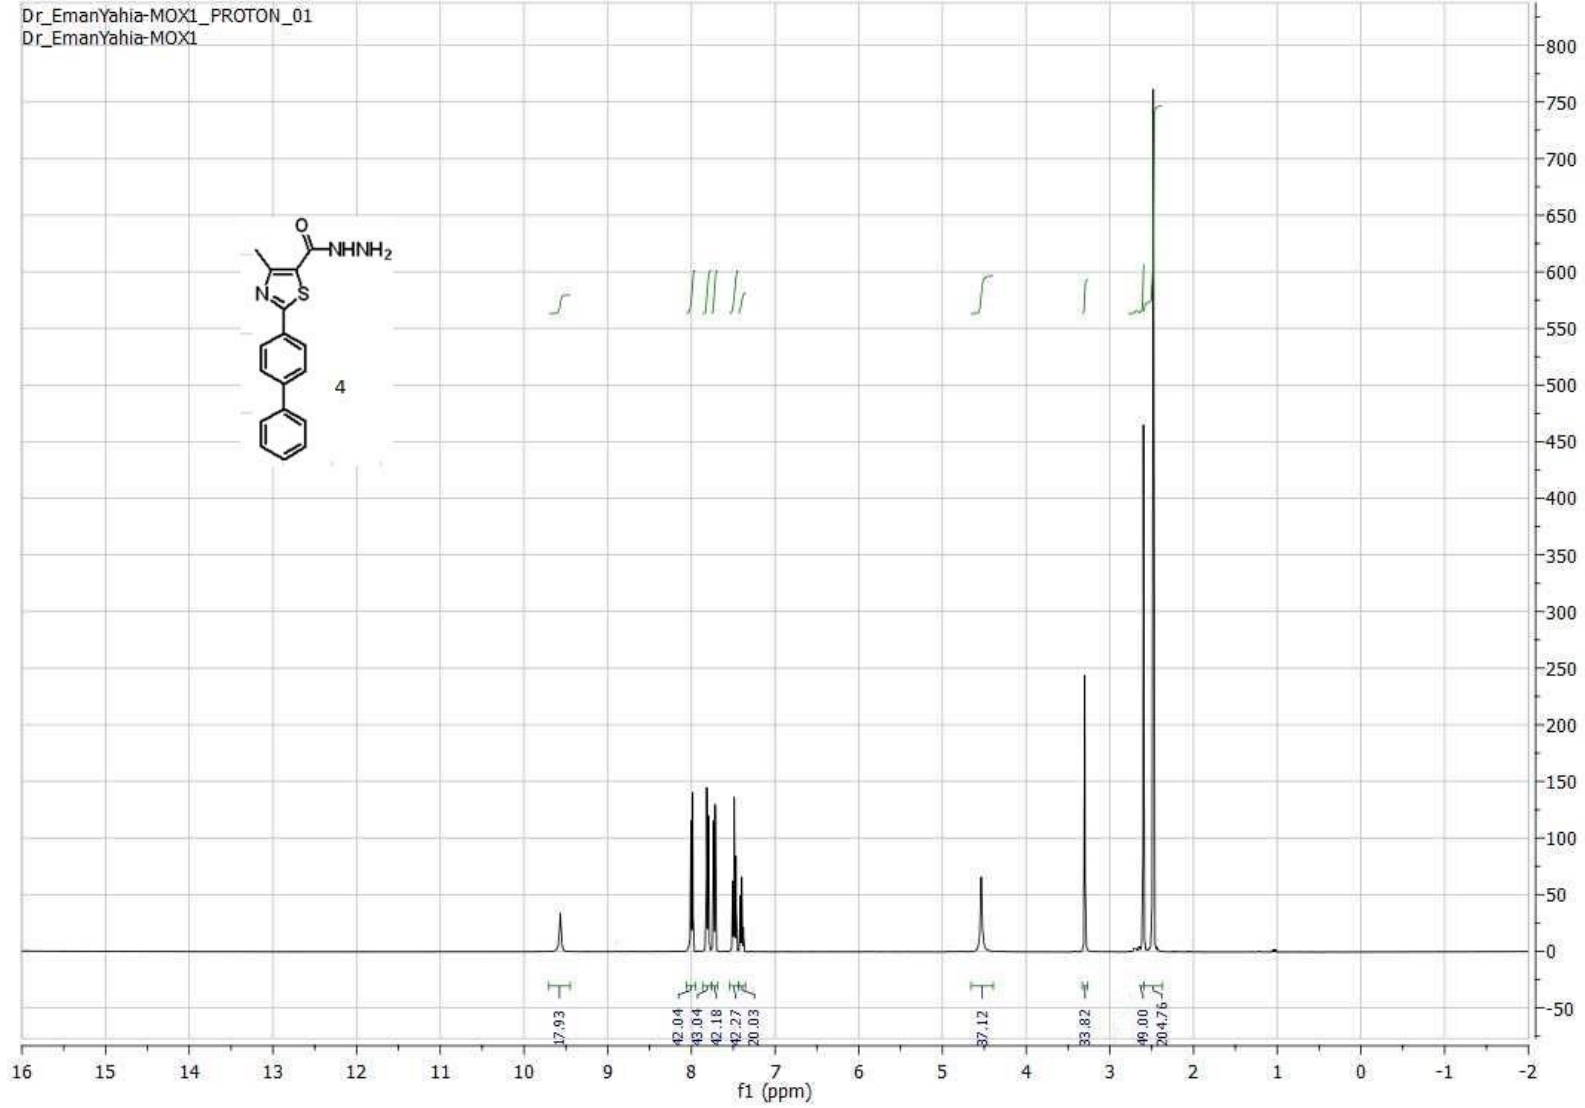

dr\_EmanYahia-MOX1\_CARBON\_01  
dr\_EmanYahia-MOX1

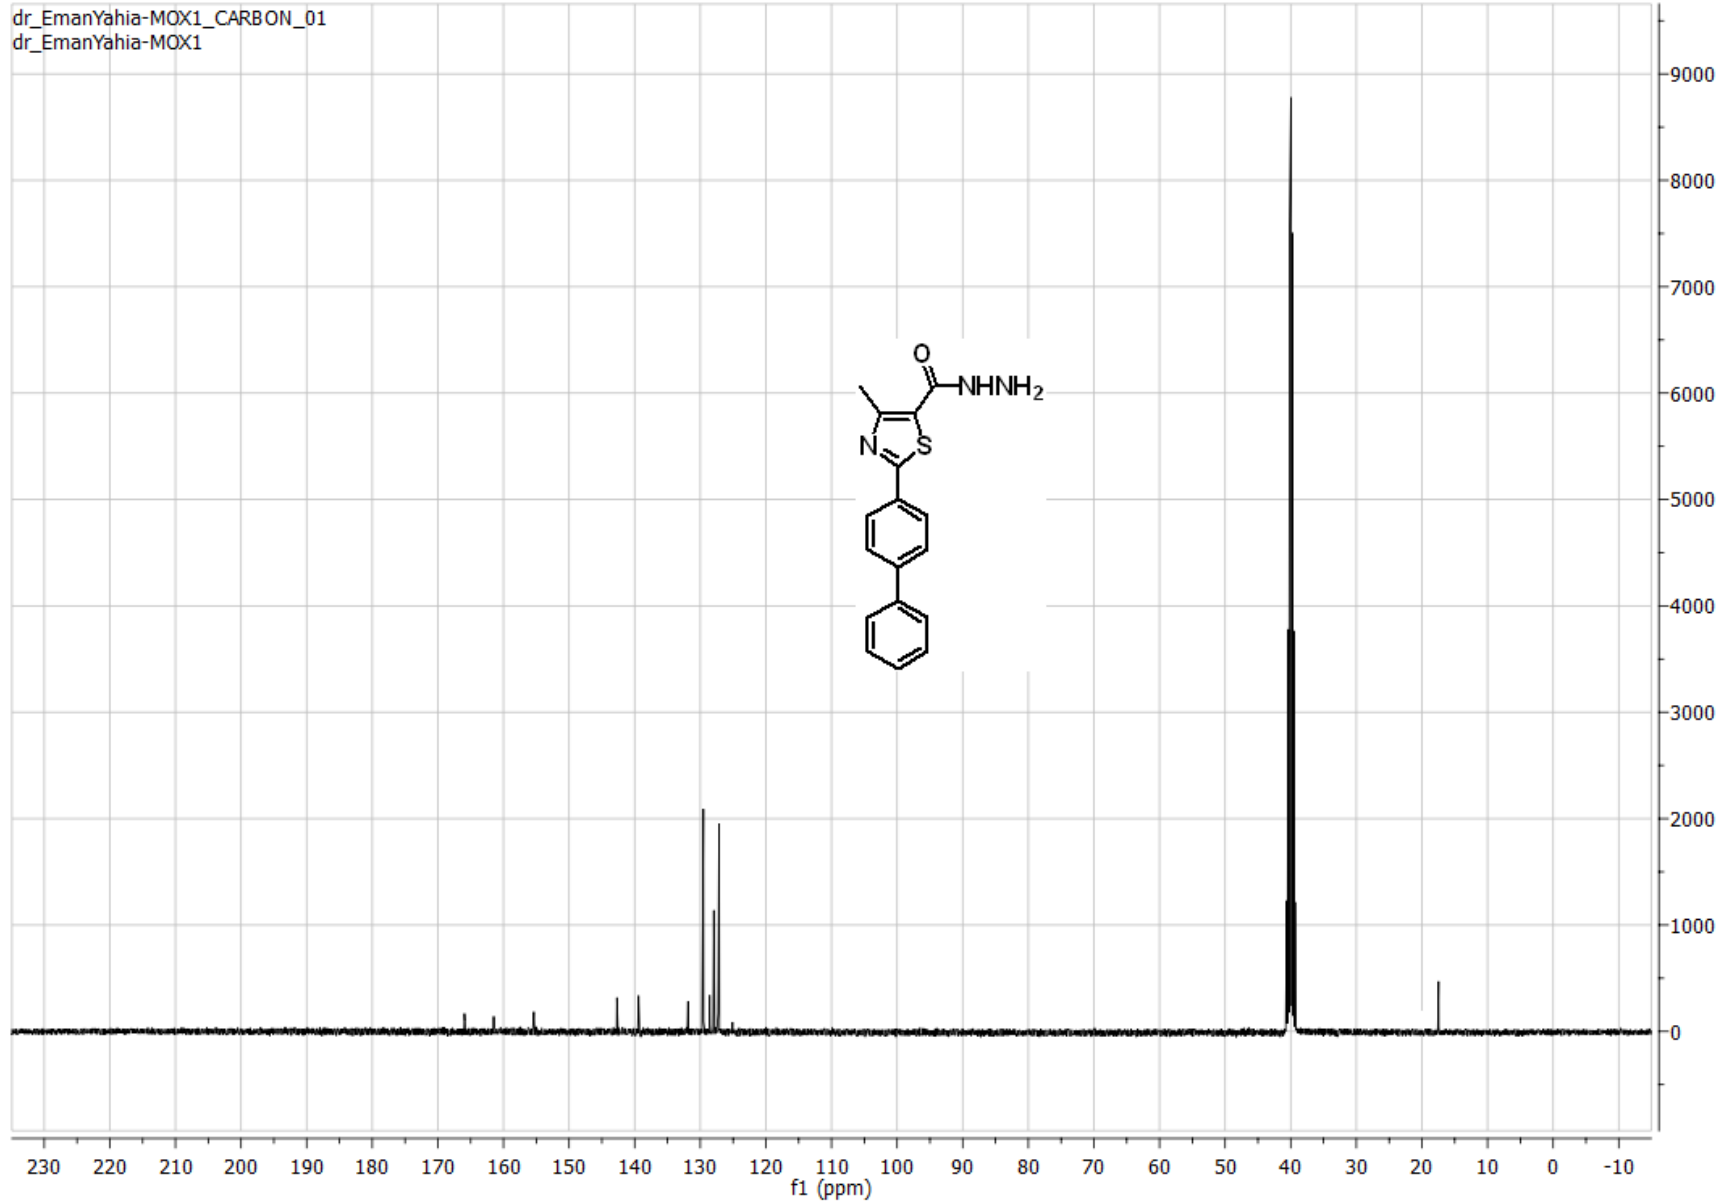

Dr\_EmanYahia-MOX2\_PROTON\_01  
Dr\_EmanYahia-MOX2

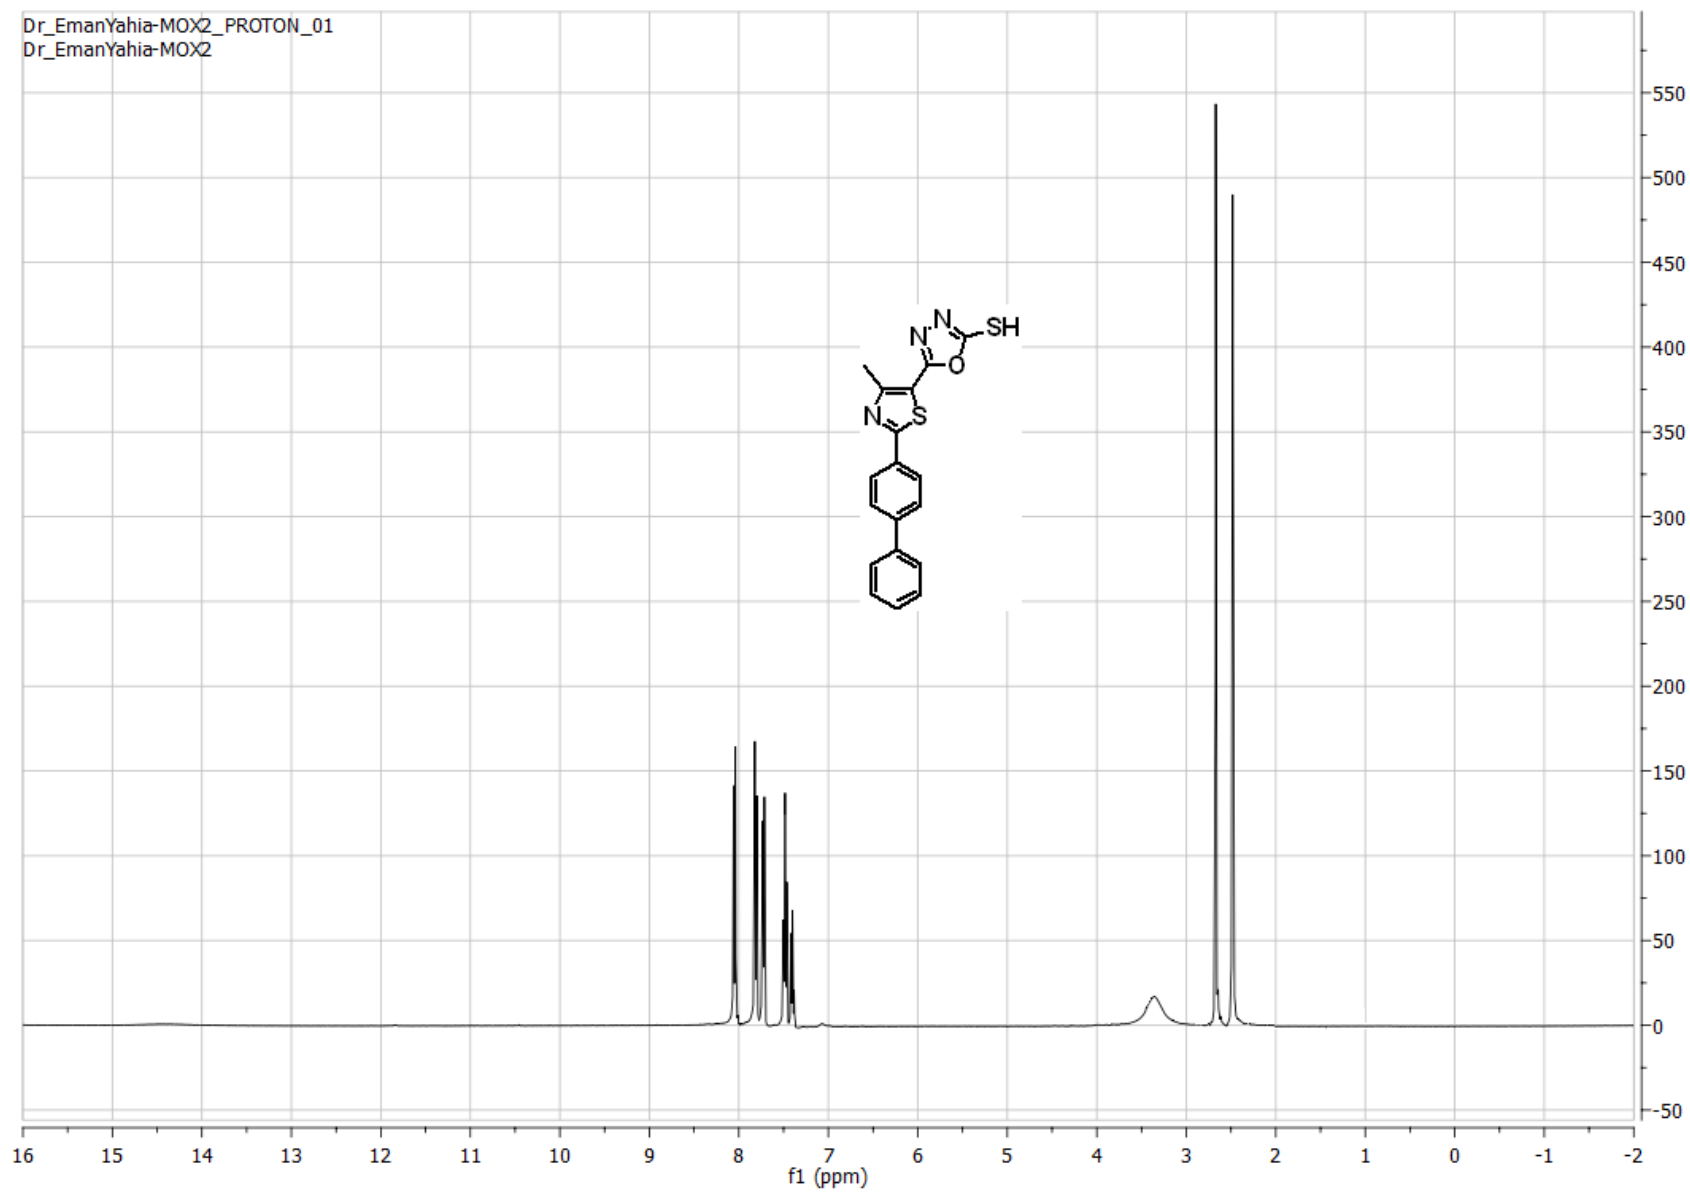



dr\_EmanYahia-MOX2\_CARBON\_01  
dr\_EmanYahia-MOX2

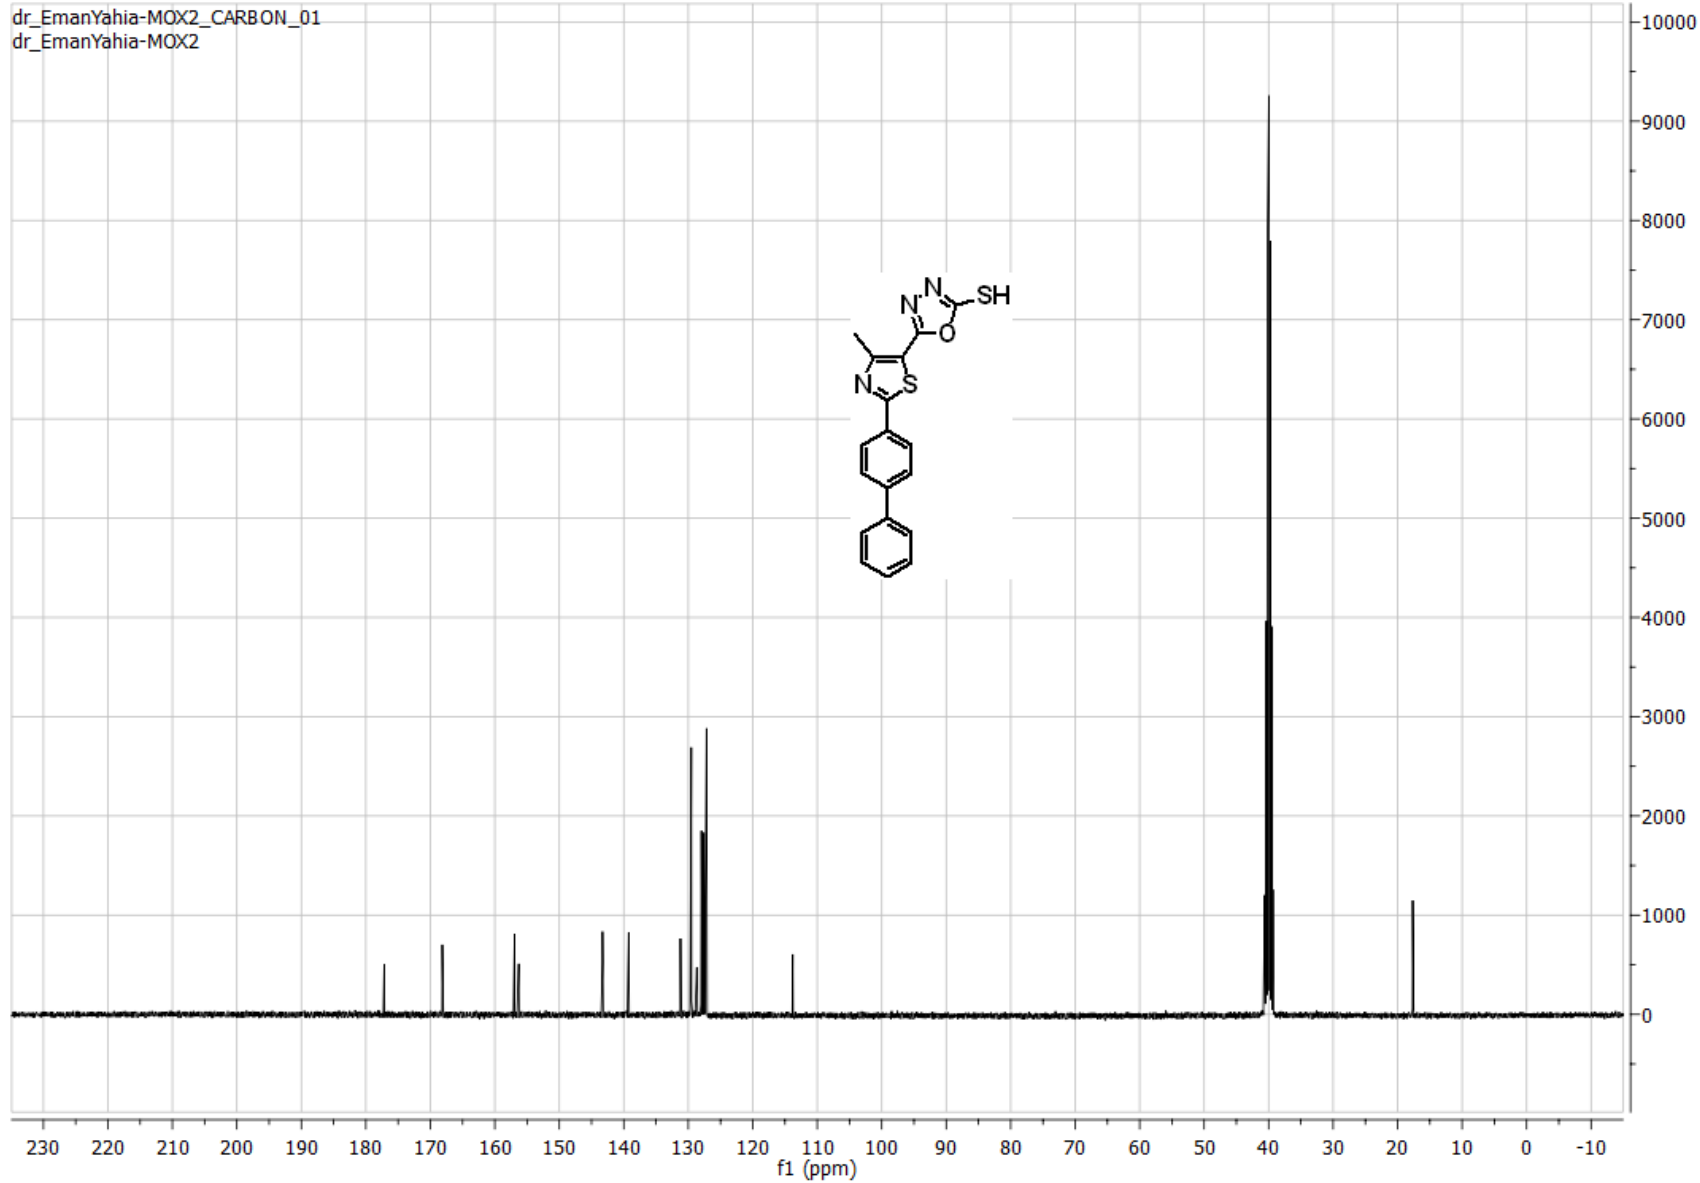

Dr\_EmanYahia-MOX3\_PROTON\_01  
Dr\_EmanYahia-MOX3

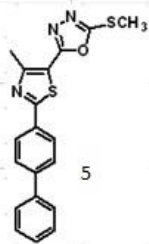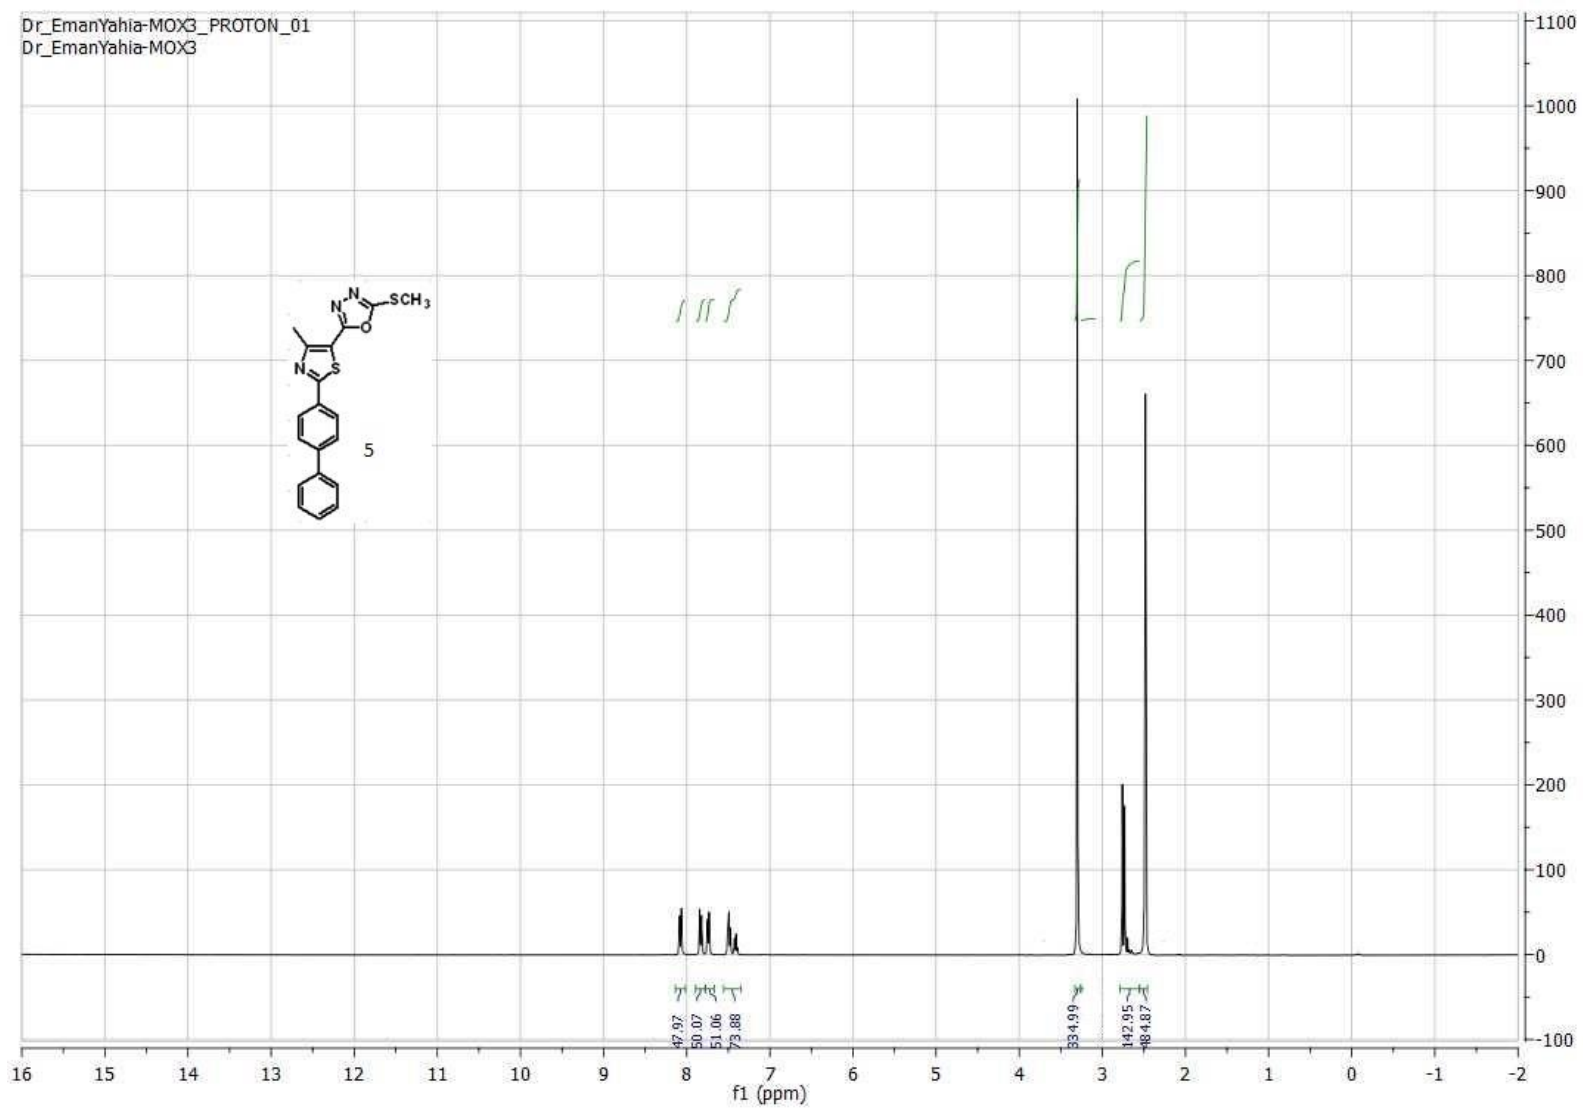

dr\_EmanYahia-MOX3\_CARBON\_01  
dr\_EmanYahia-MOX3

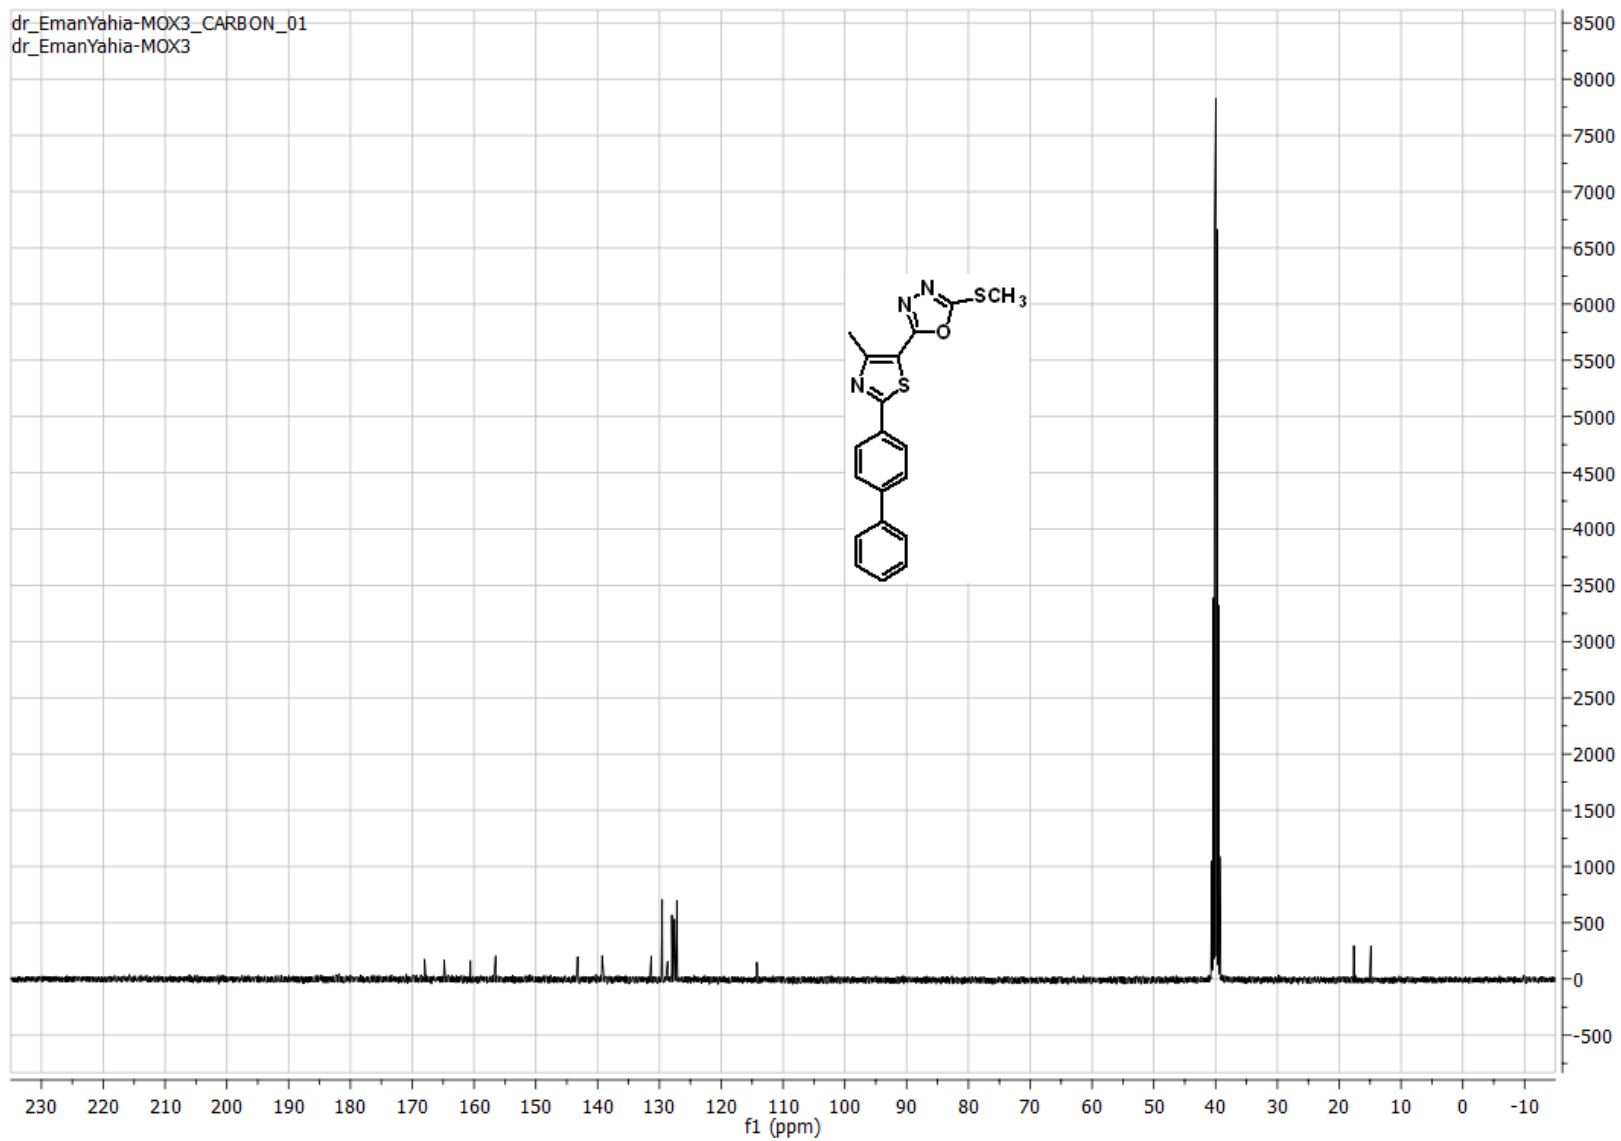

Dr\_AbdelrhmanSalha-MOX4\_PROTON\_01  
Dr\_AbdelrhmanSalha-MOX4

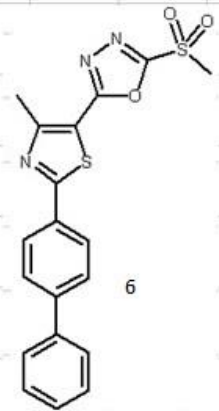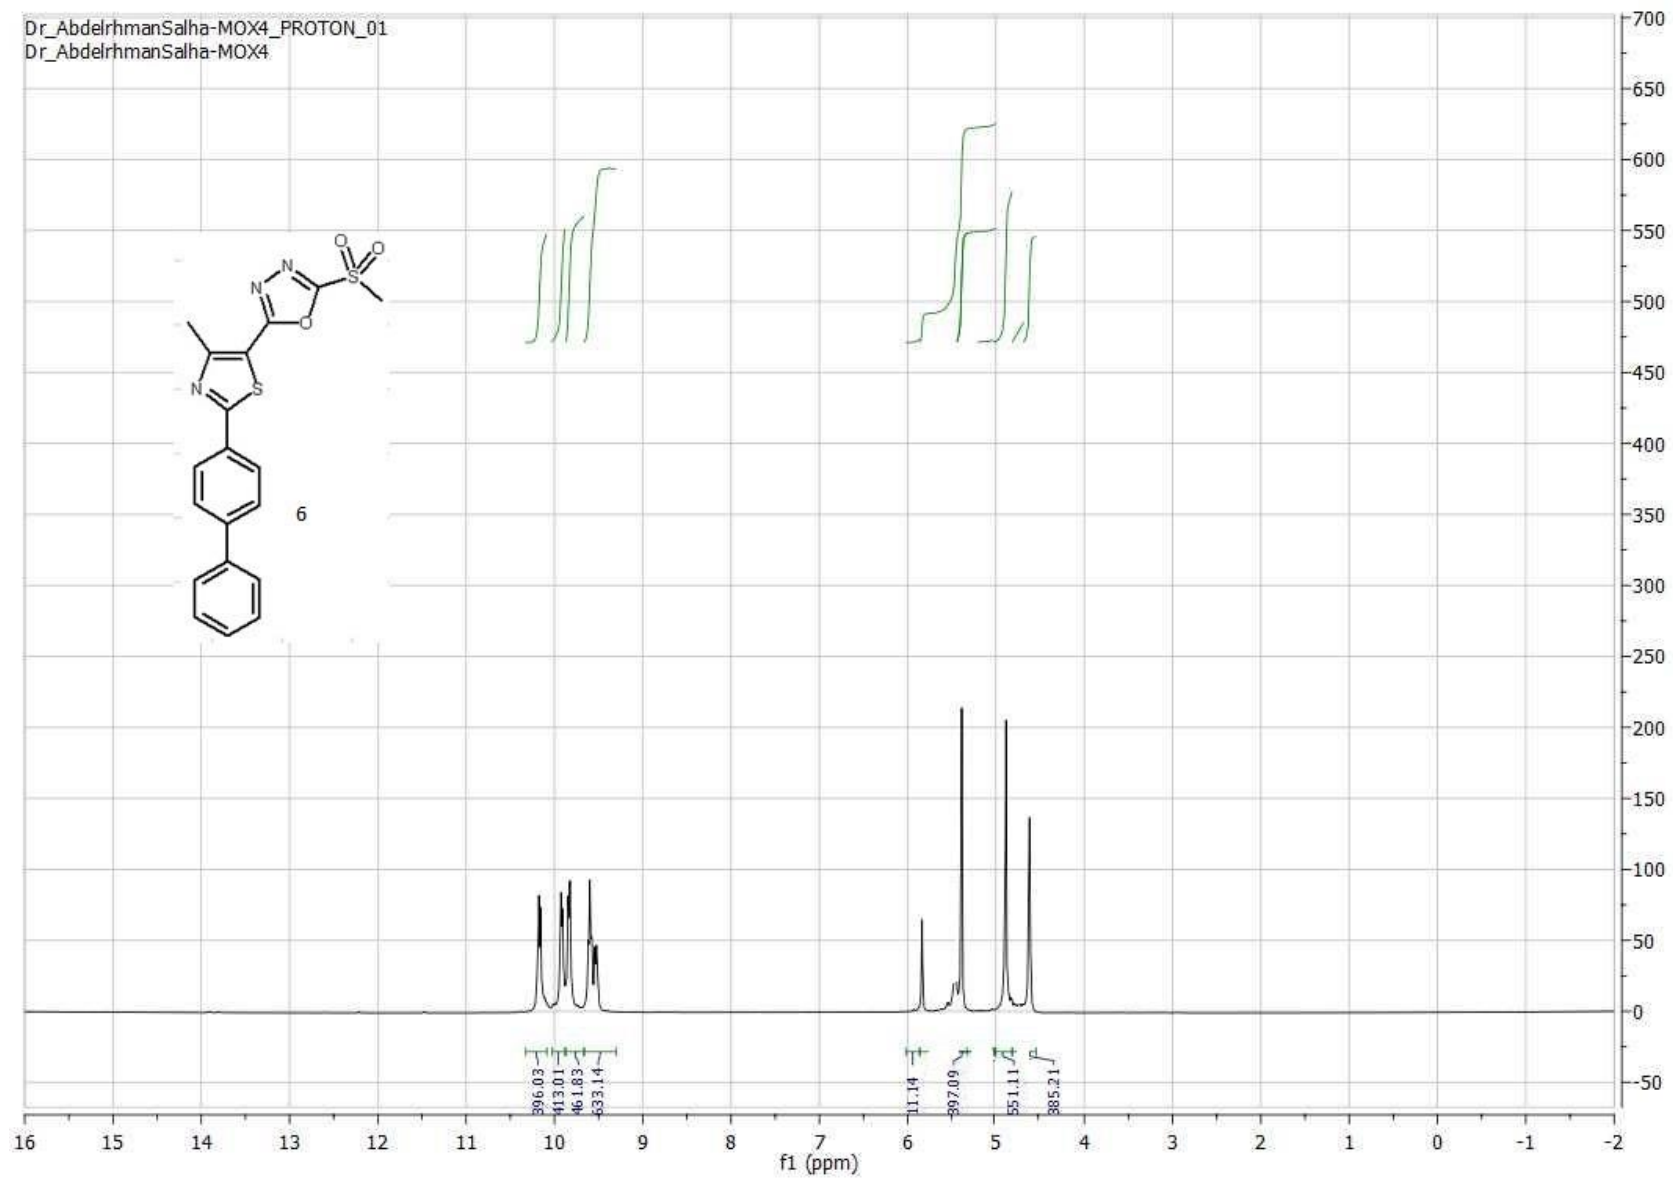

Dr\_AbdelrhmanSalha-MOX4\_CARBON\_01  
Dr\_AbdelrhmanSalha-MOX4

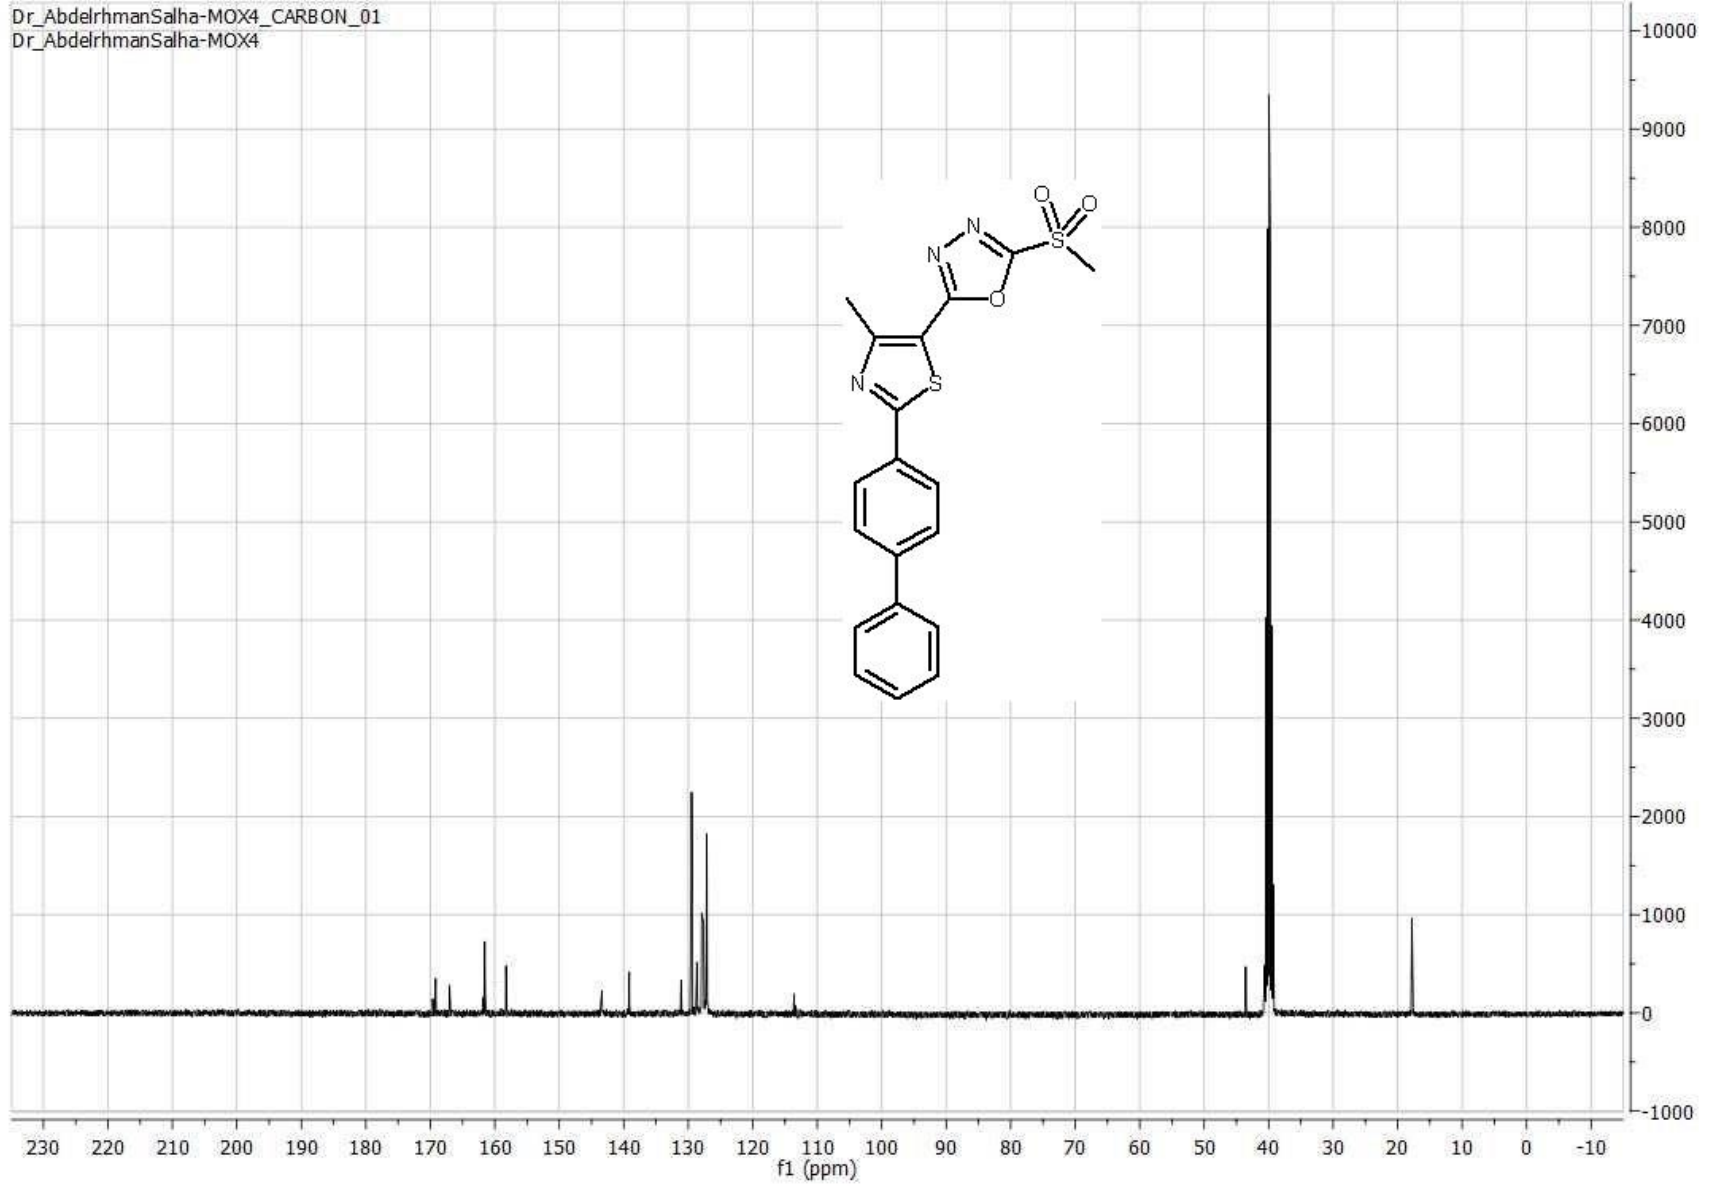

dr\_EmanYahia-MOX19\_PROTON\_01  
dr\_EmanYahia-MOX19

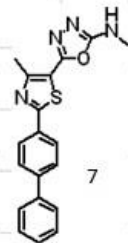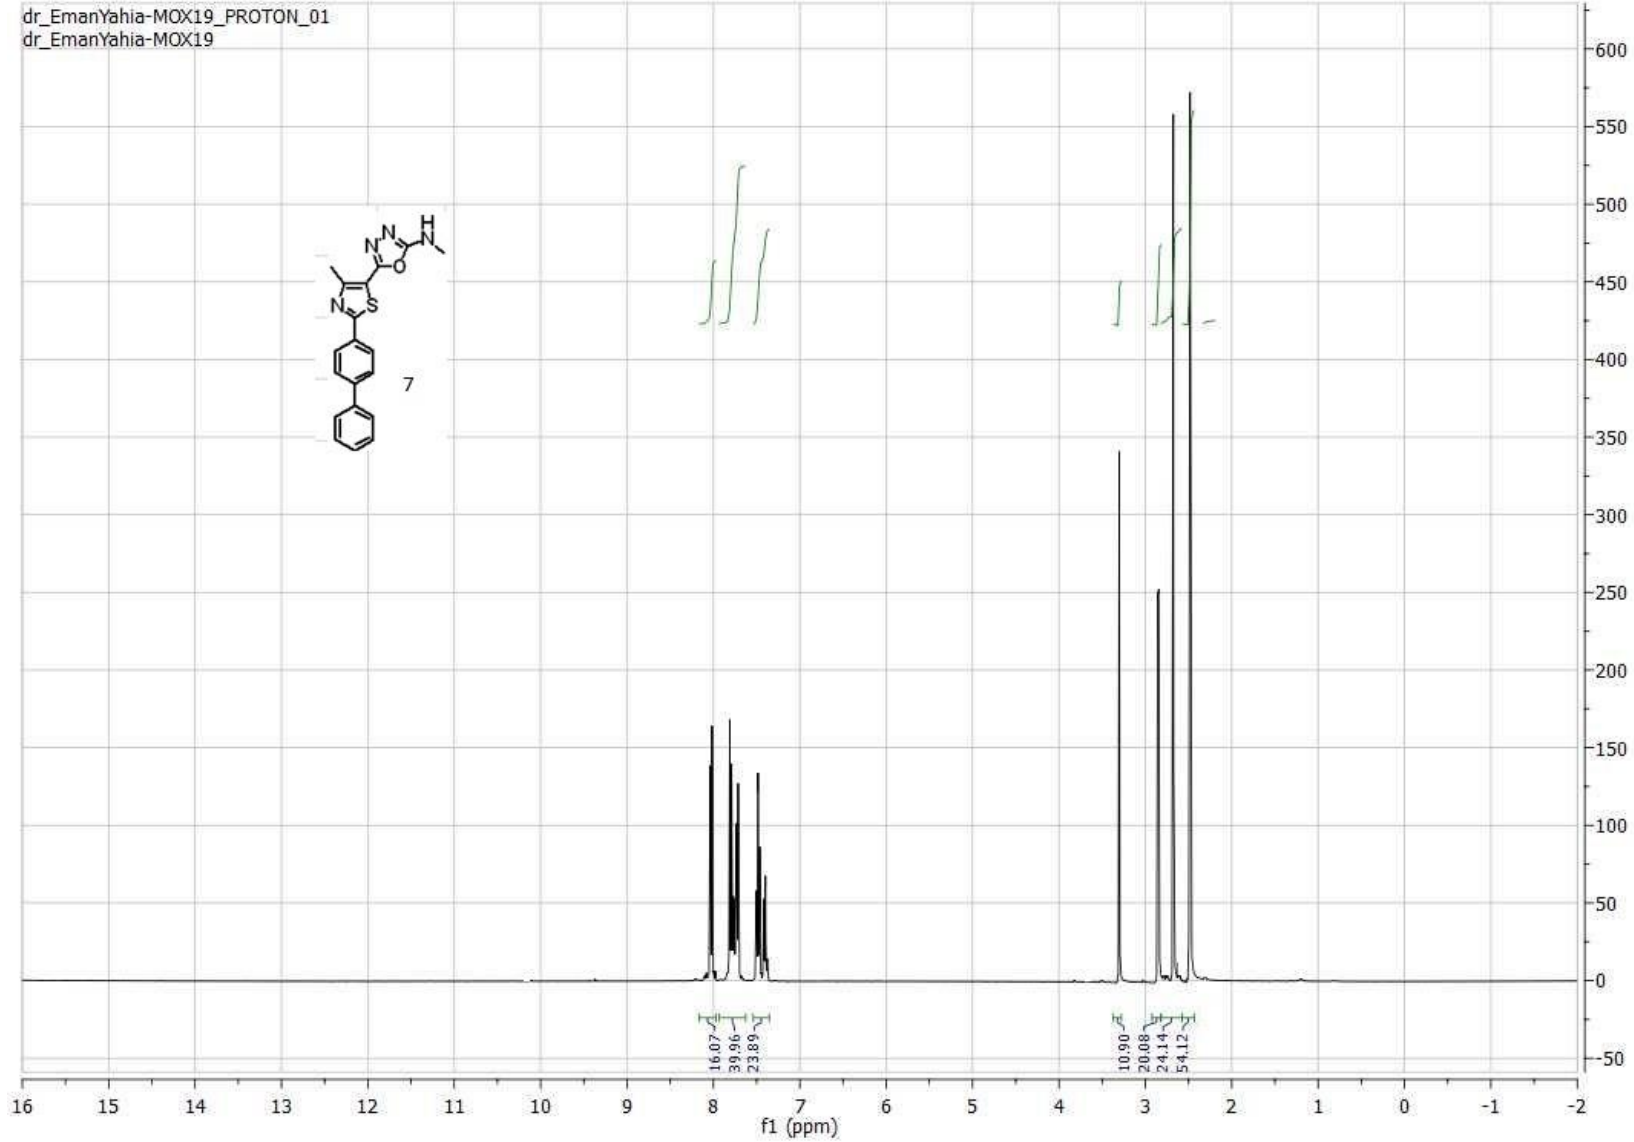

Dr\_EmanYahia-MOX19\_CARBO...  
Dr\_EmanYahia-MOX19

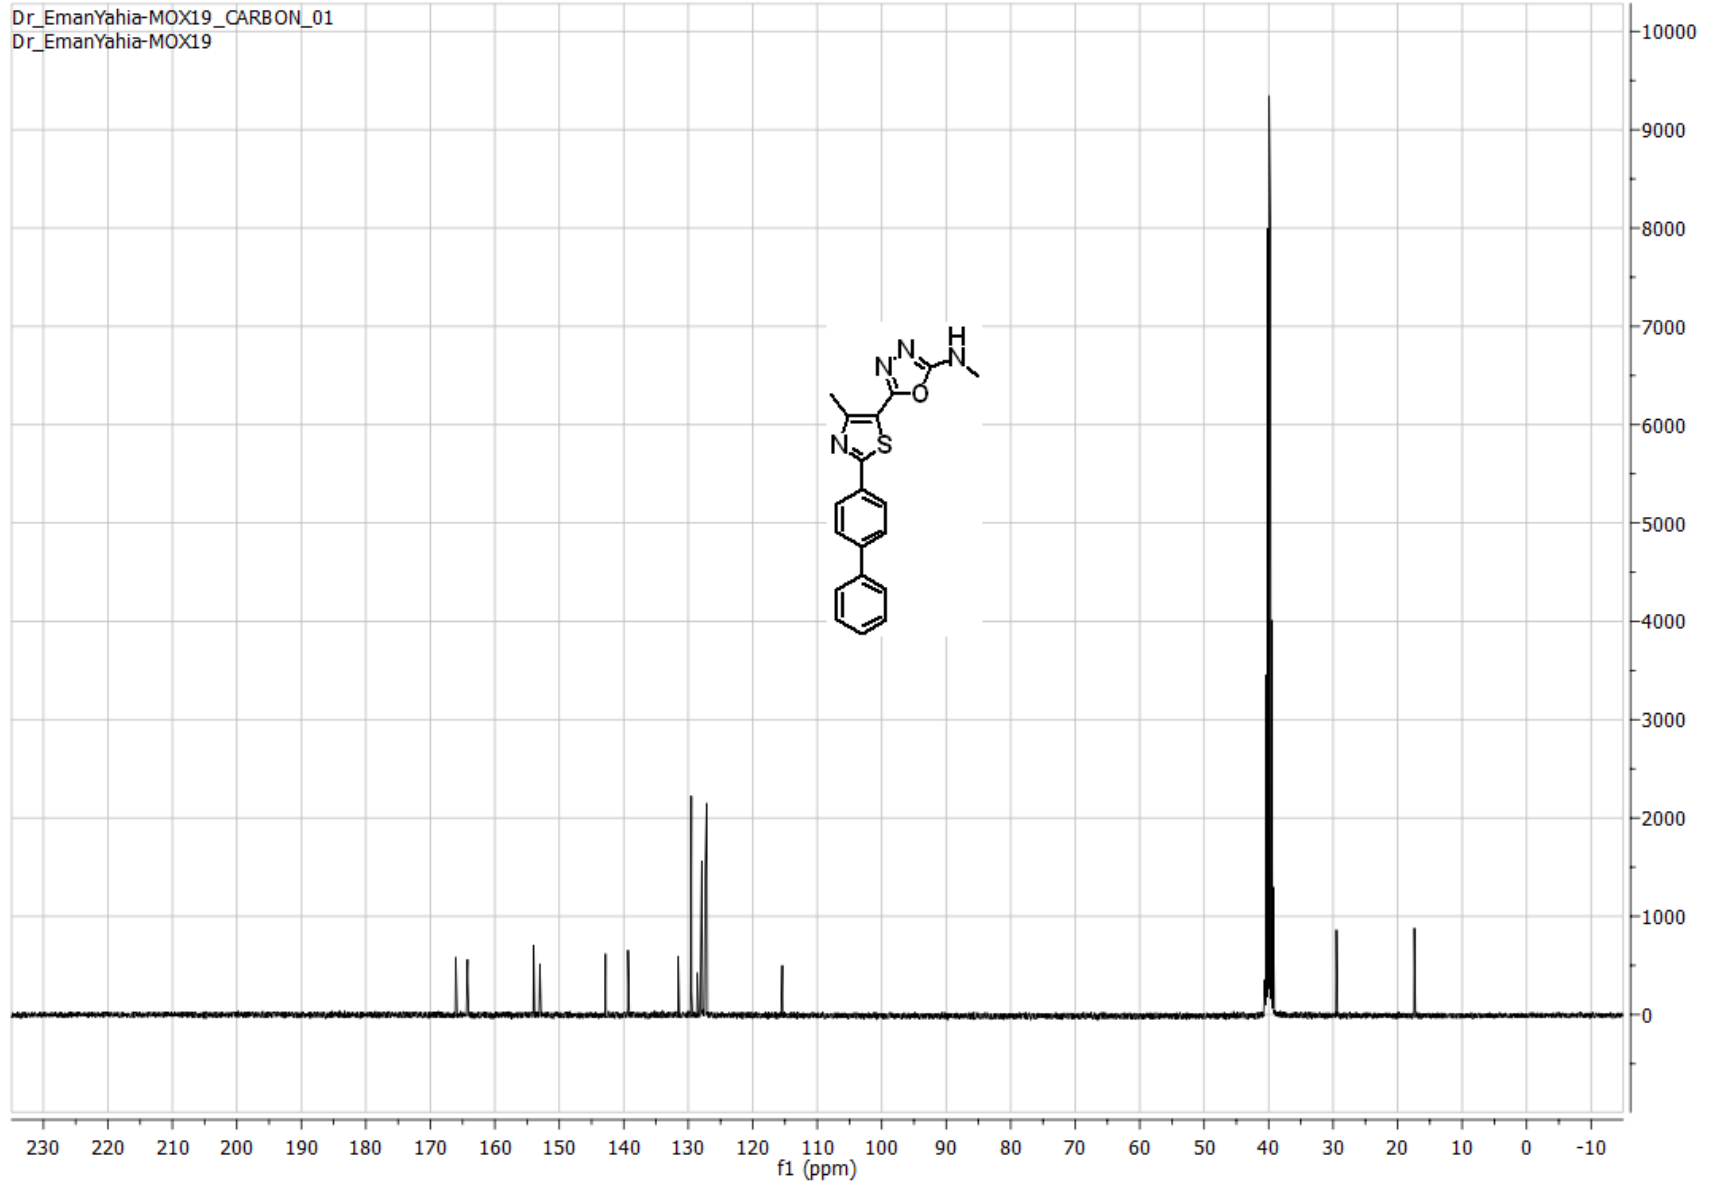

dr\_EmanYahia-MOX15\_PROTON\_01  
dr\_EmanYahia-MOX15

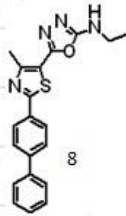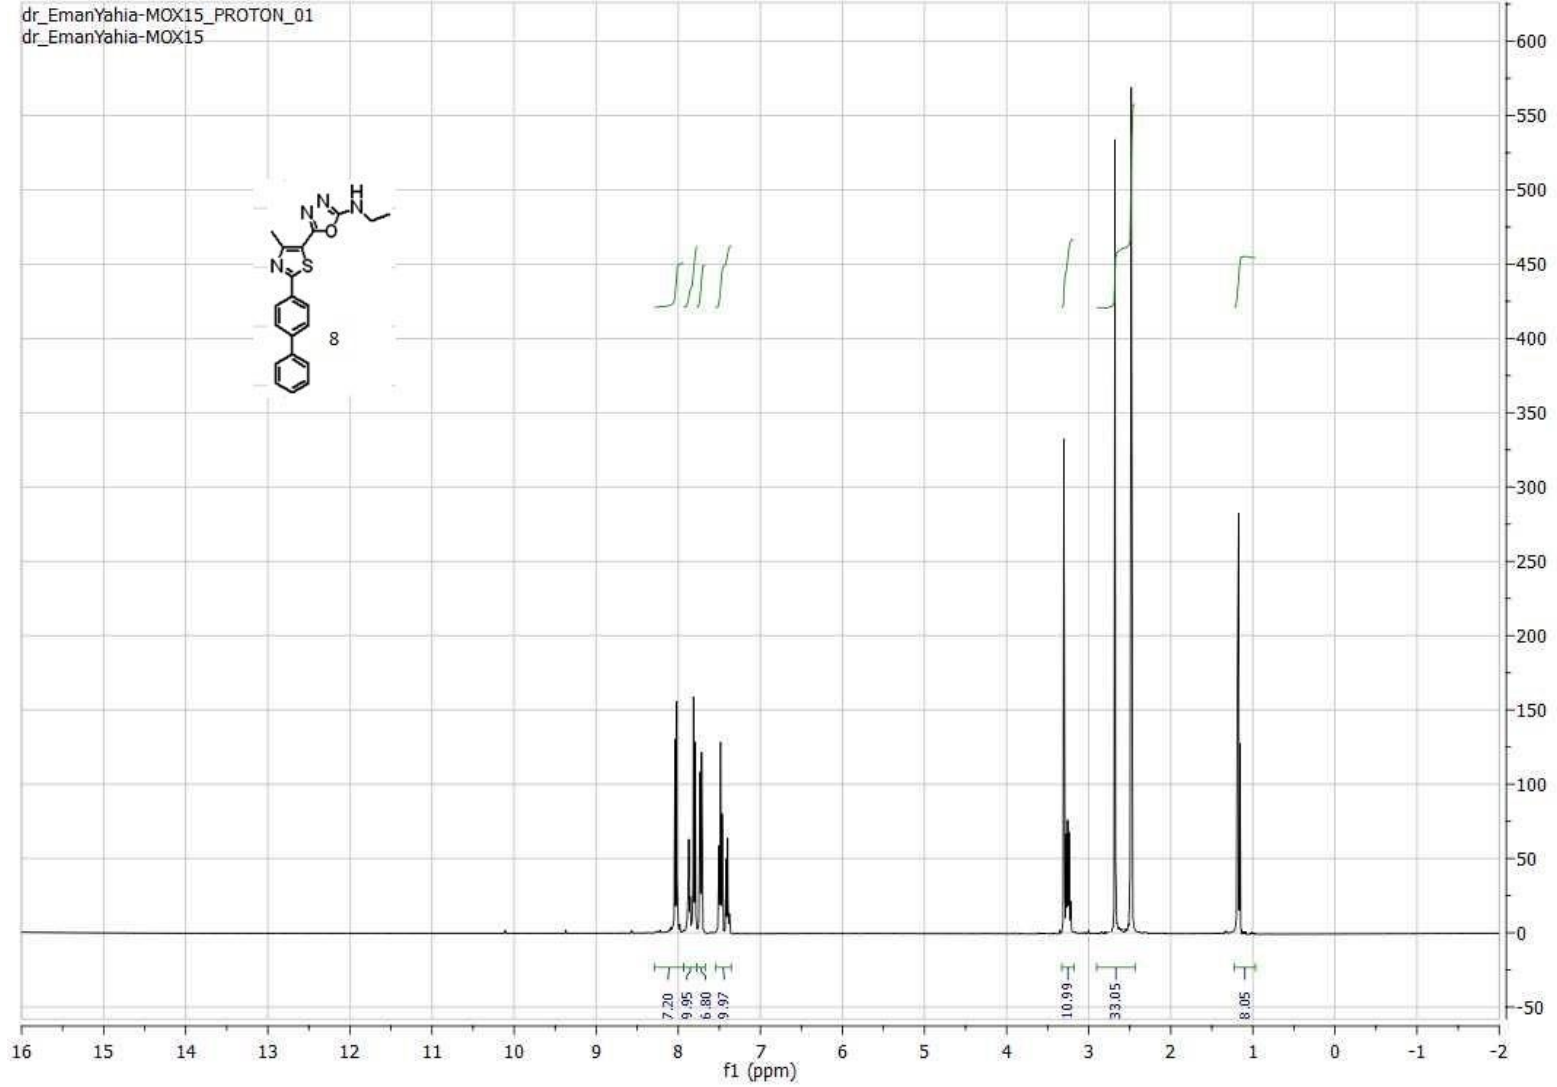



Dr\_EmanYahia-MOX15\_CARBO\_01  
Dr\_EmanYahia-MOX15

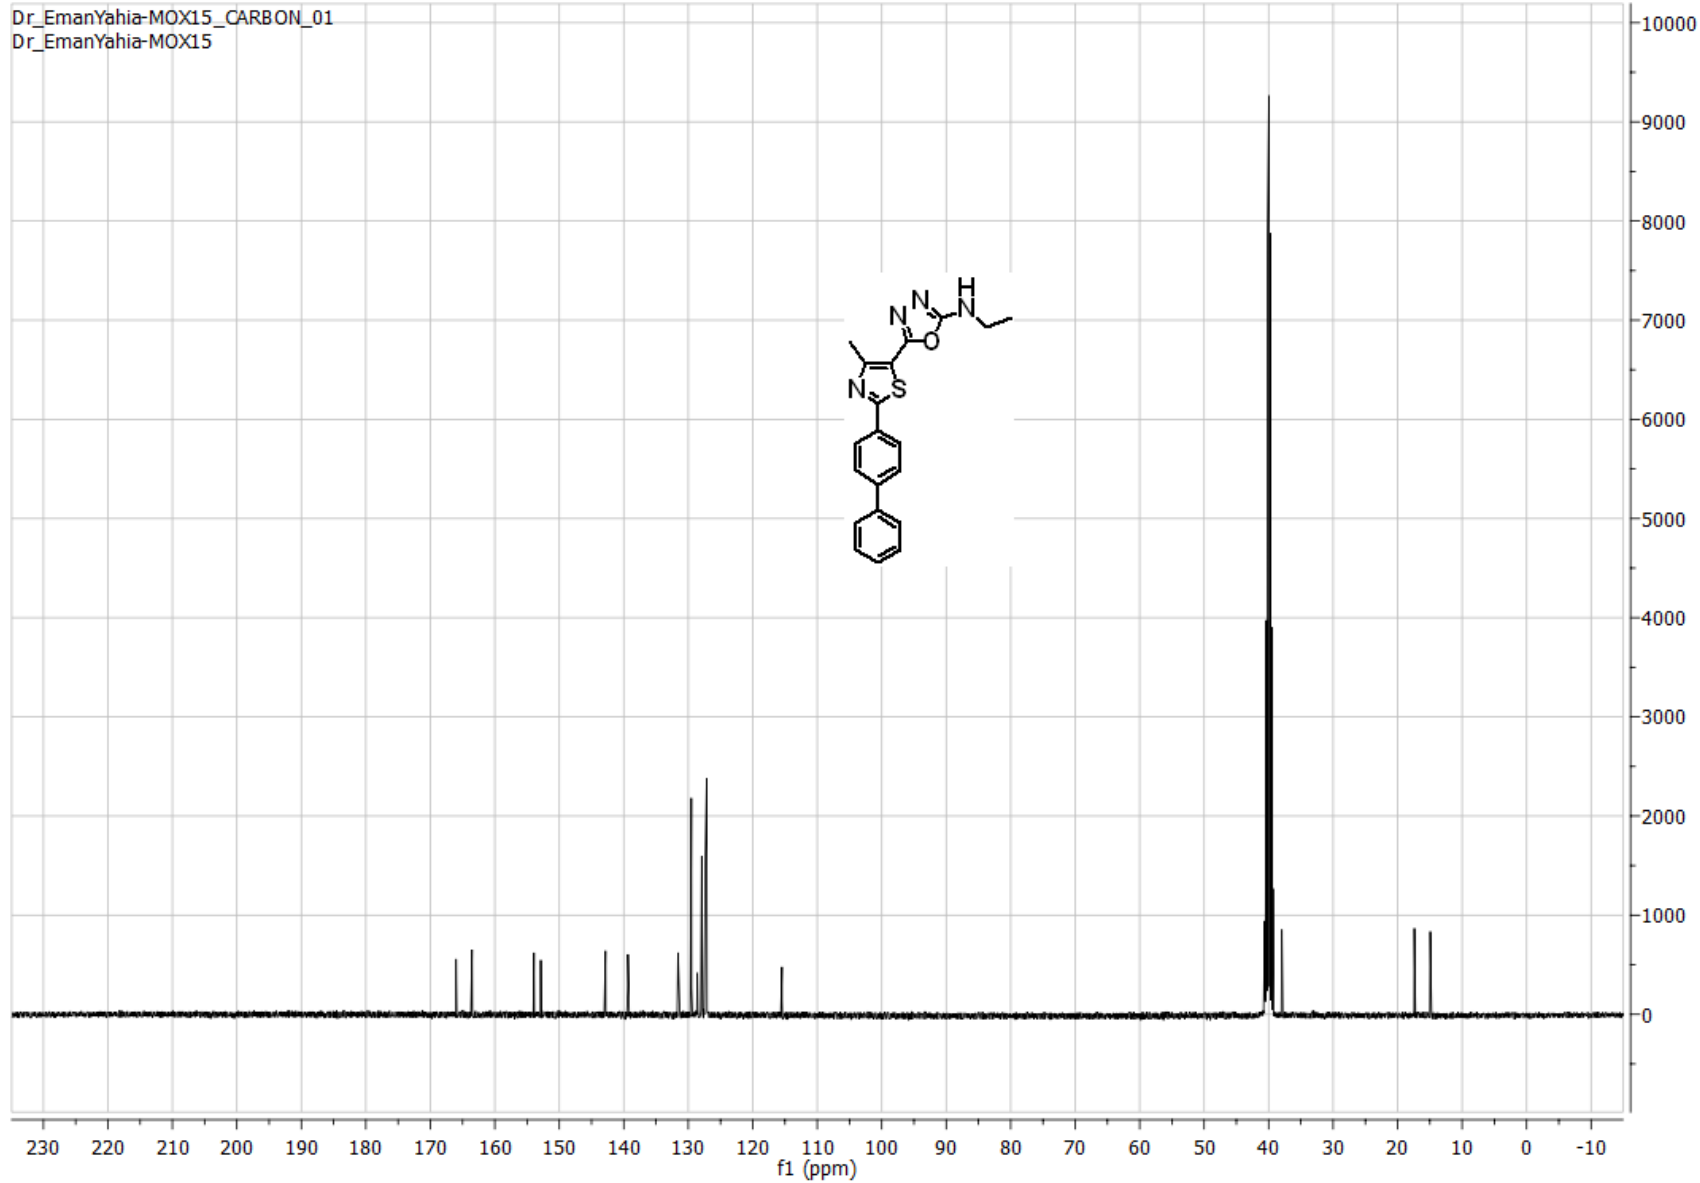

dr\_EmanYahia-MOX22\_PROTON\_01  
dr\_EmanYahia-MOX22

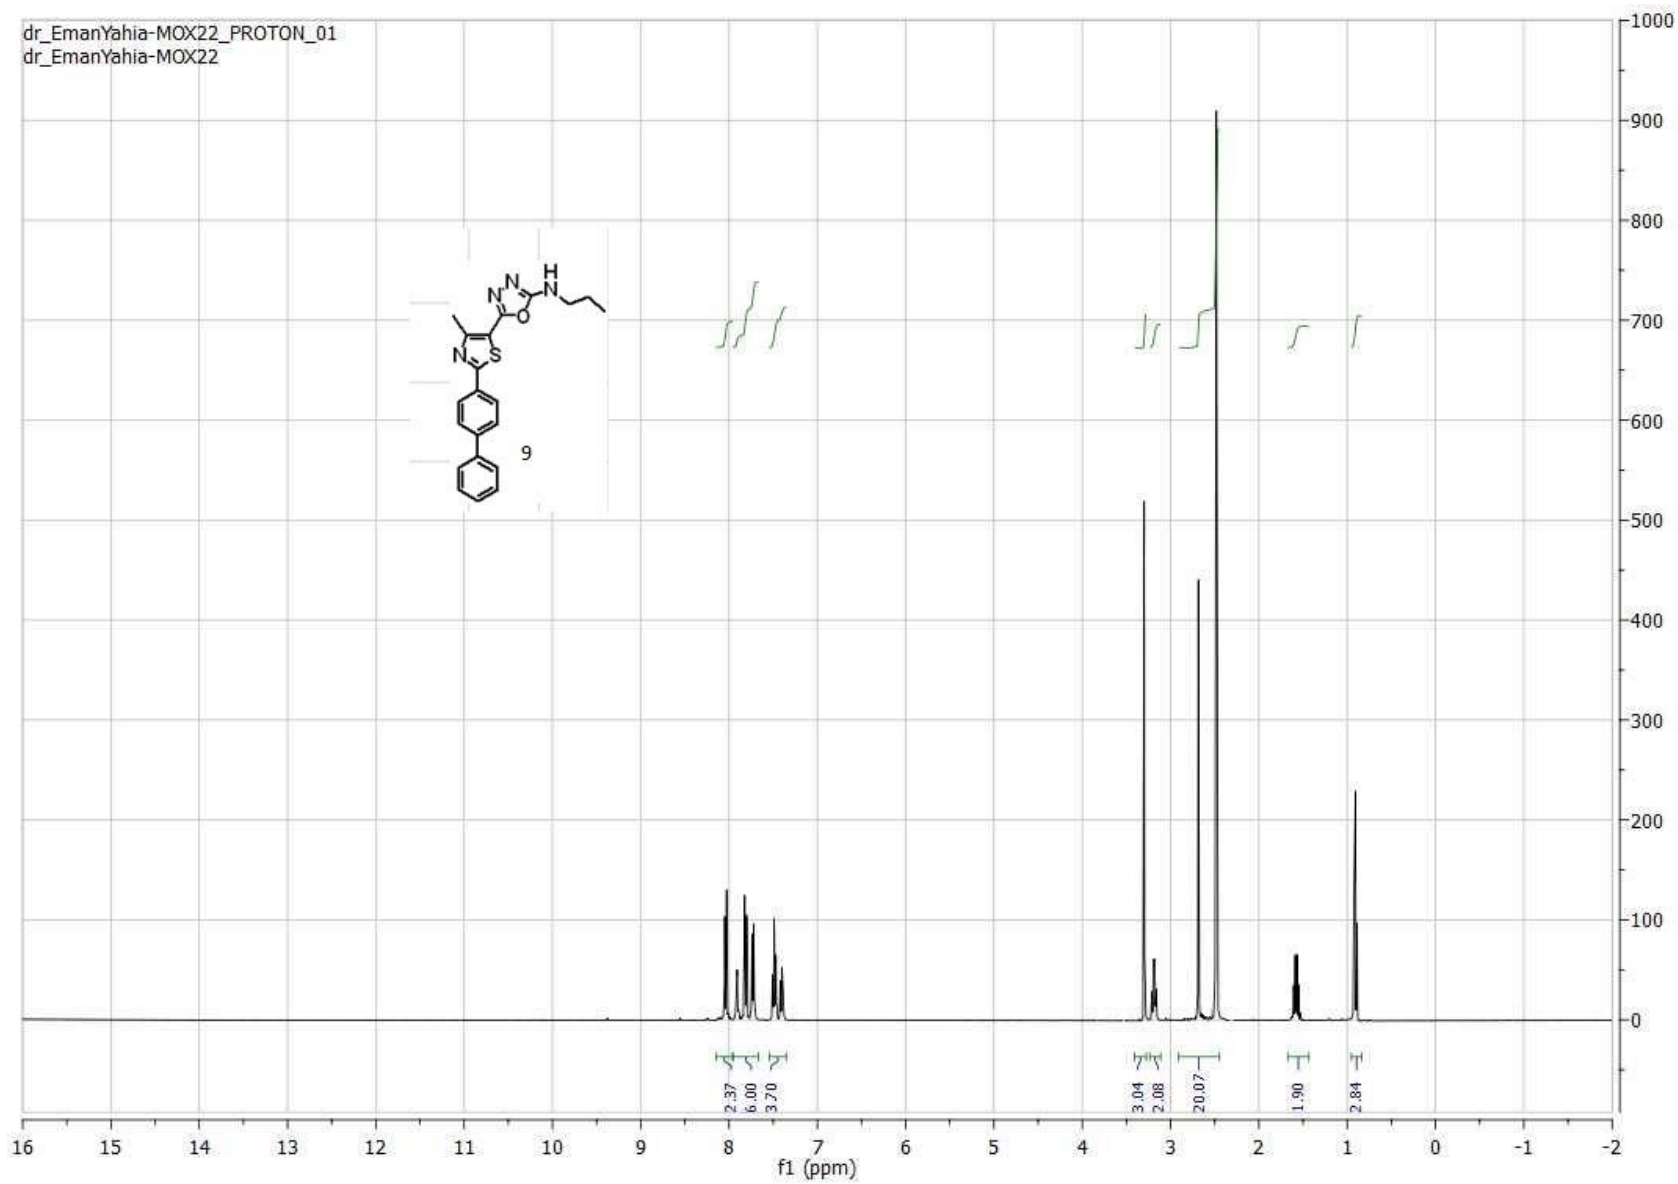

Dr\_EmanYahia-MOX22\_CARBON\_01  
Dr\_EmanYahia-MOX22

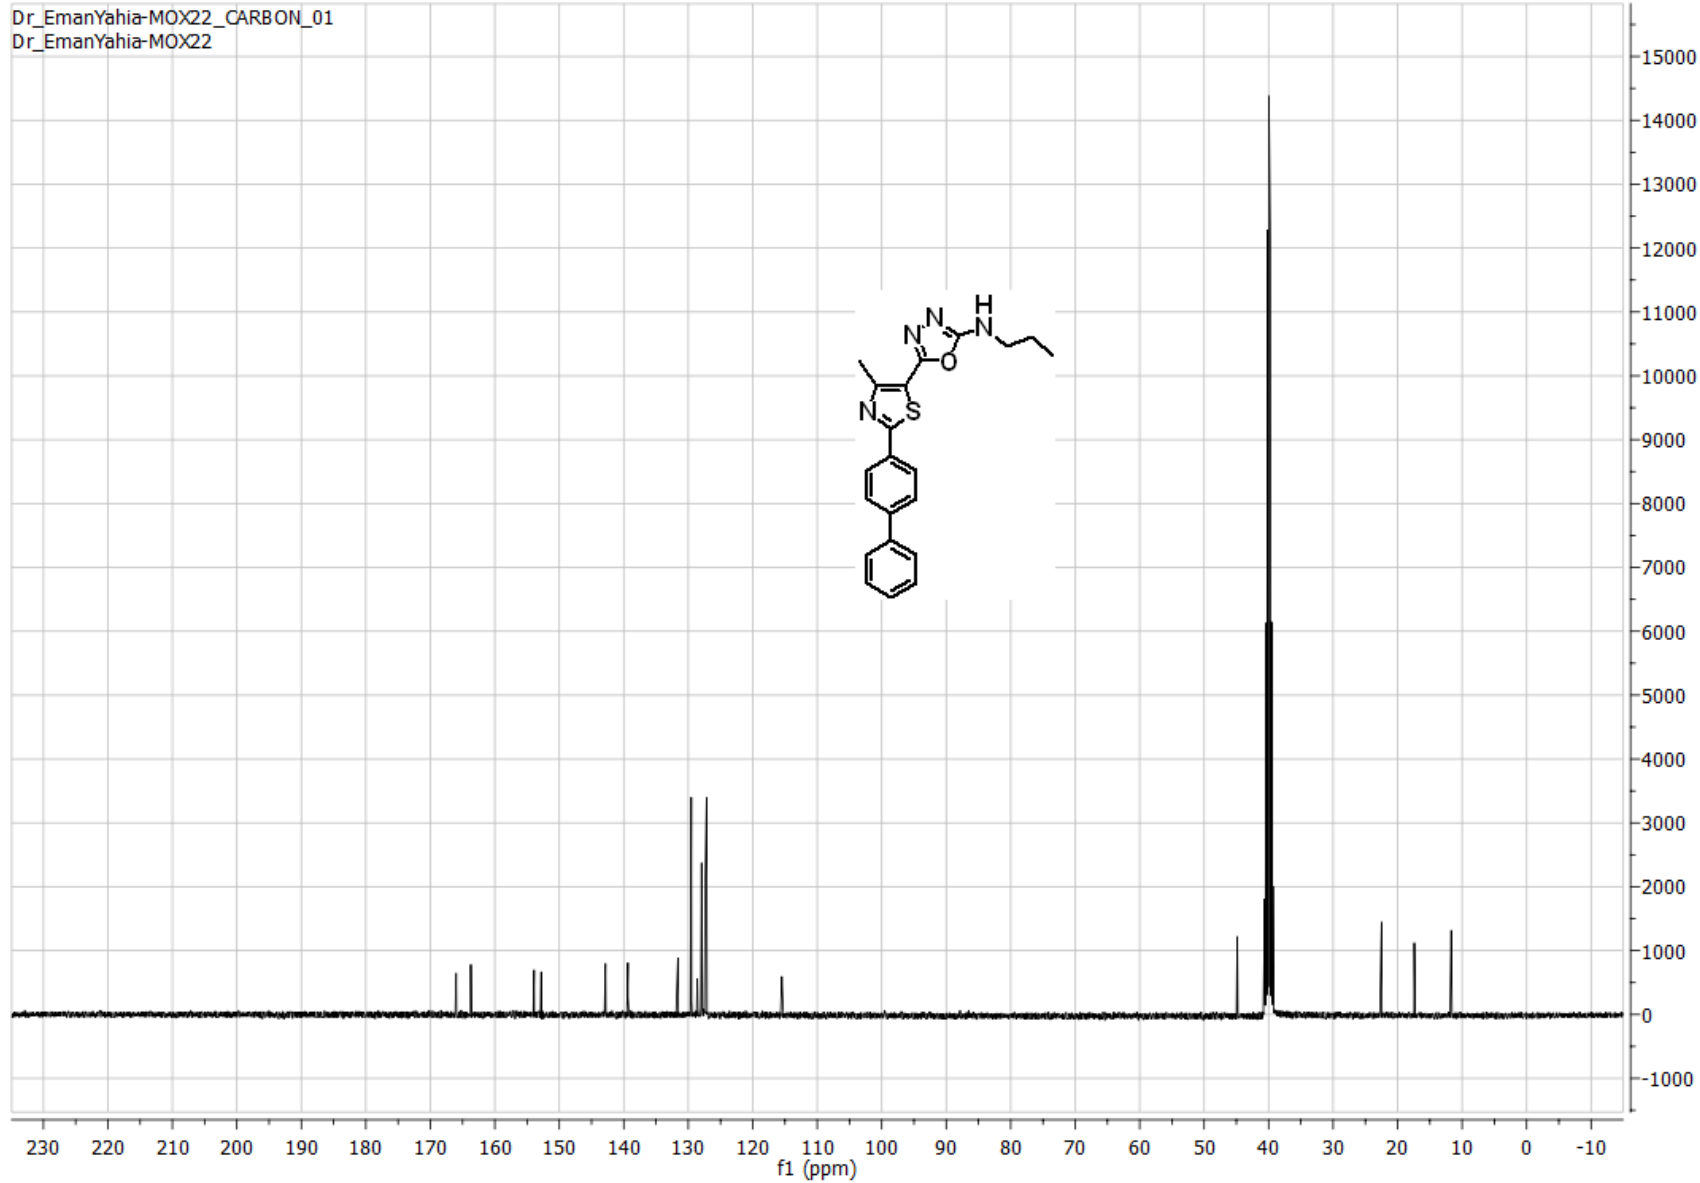

dr\_EmanYahia-MOX16\_PROTON\_01  
dr\_EmanYahia-MOX16

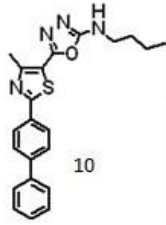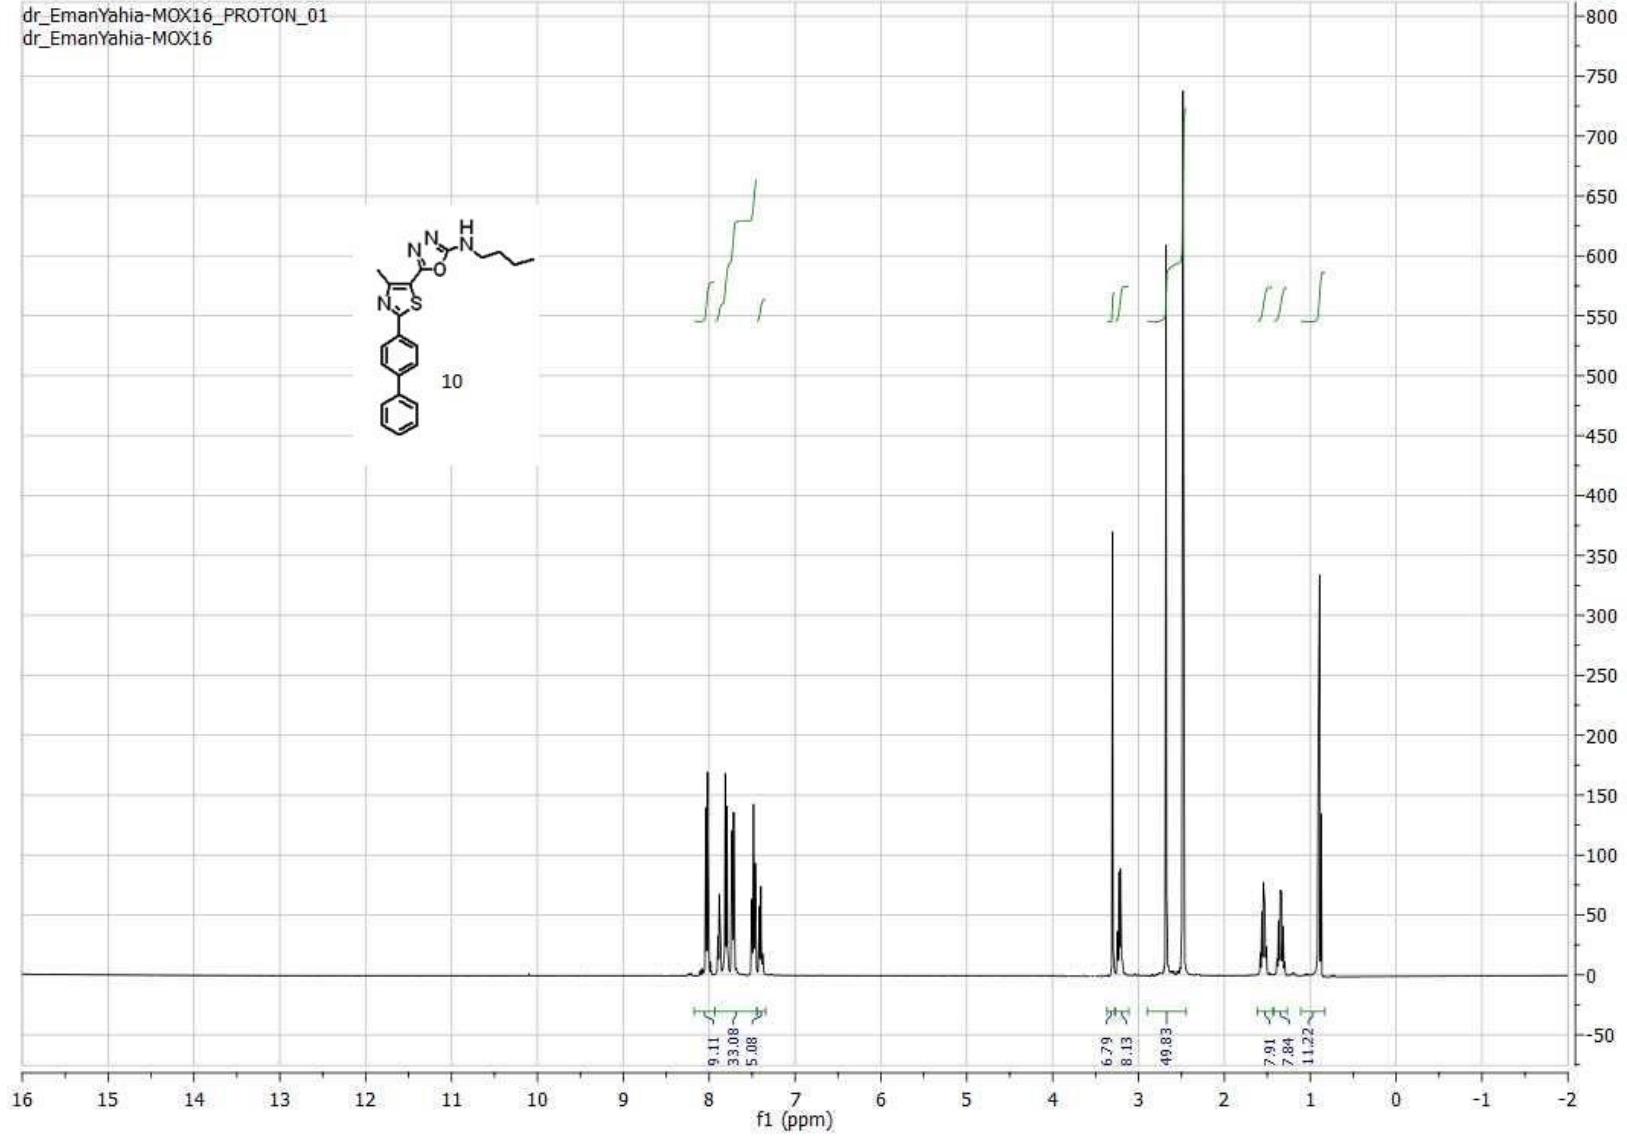

Dr\_EmanYahia-MOX16\_CARBON\_01  
Dr\_EmanYahia-MOX16

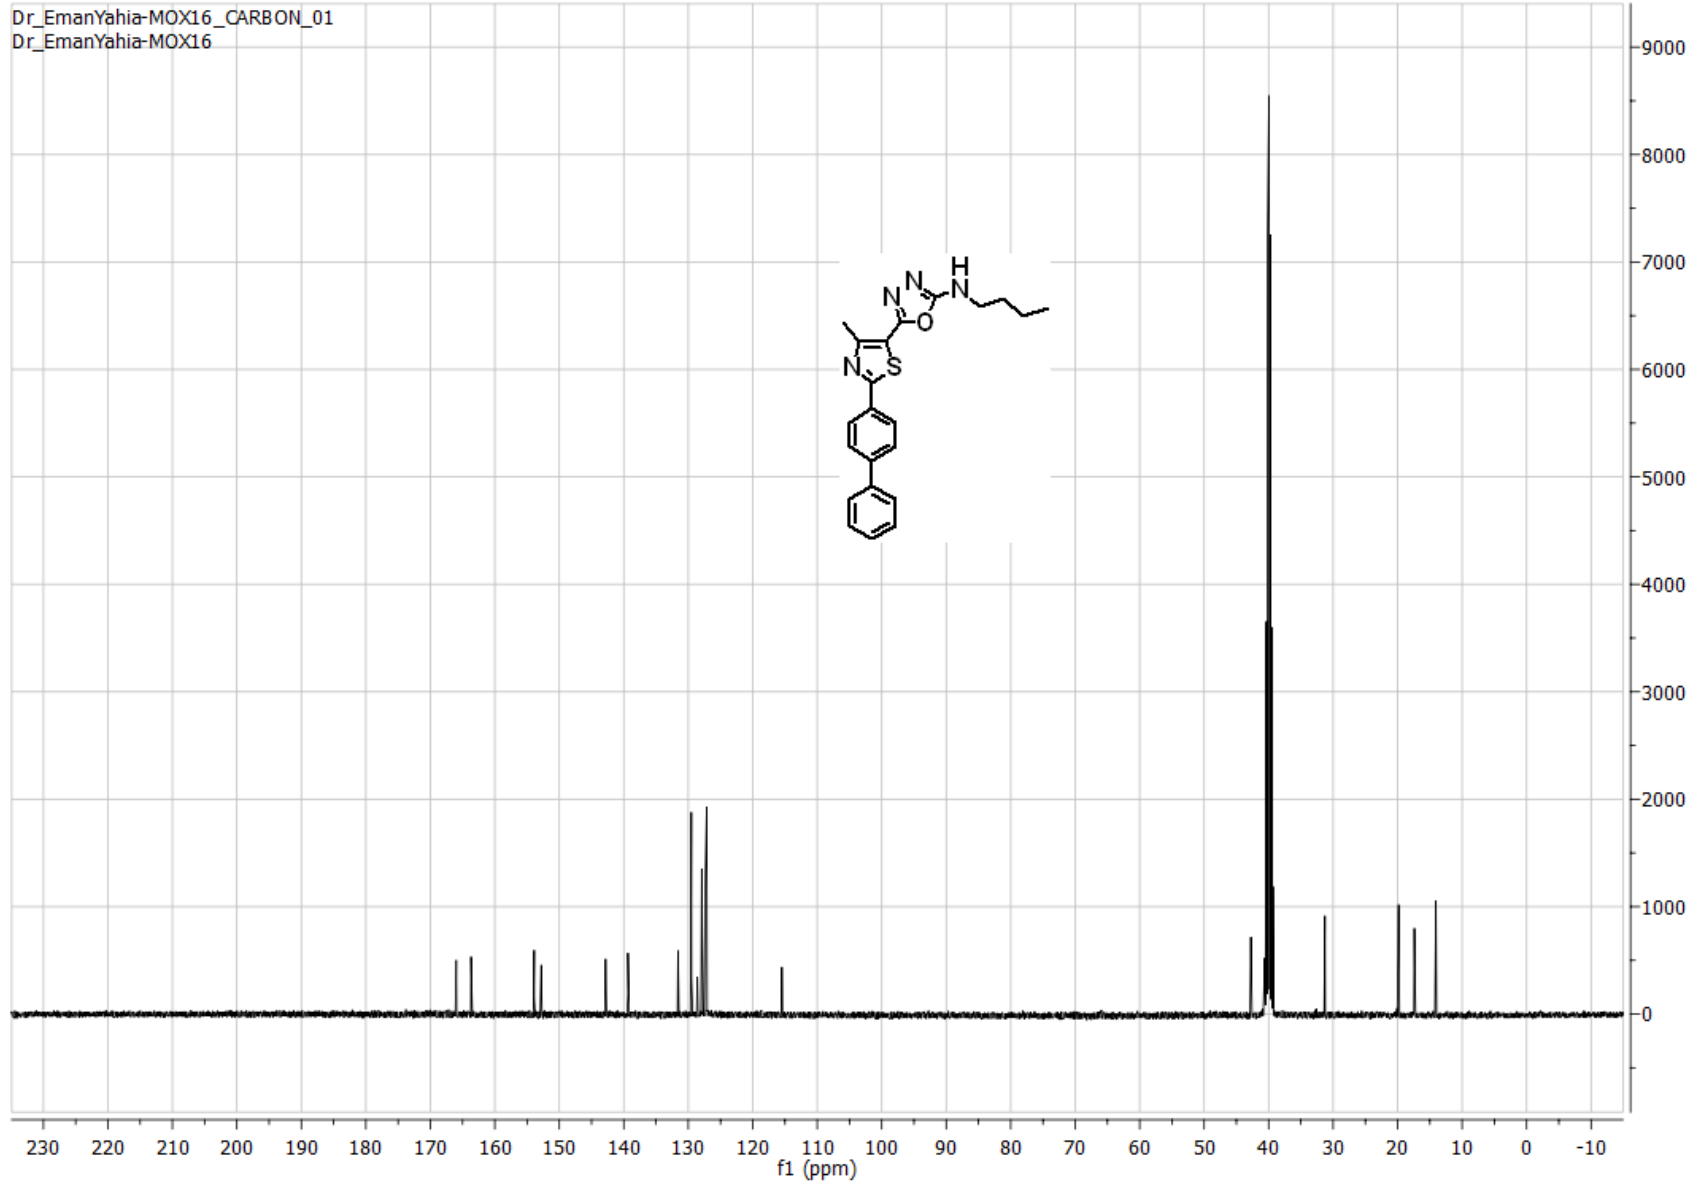

dr\_EmanYahia-MOX18\_PROTON\_01  
dr\_EmanYahia-MOX18

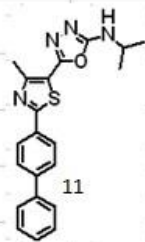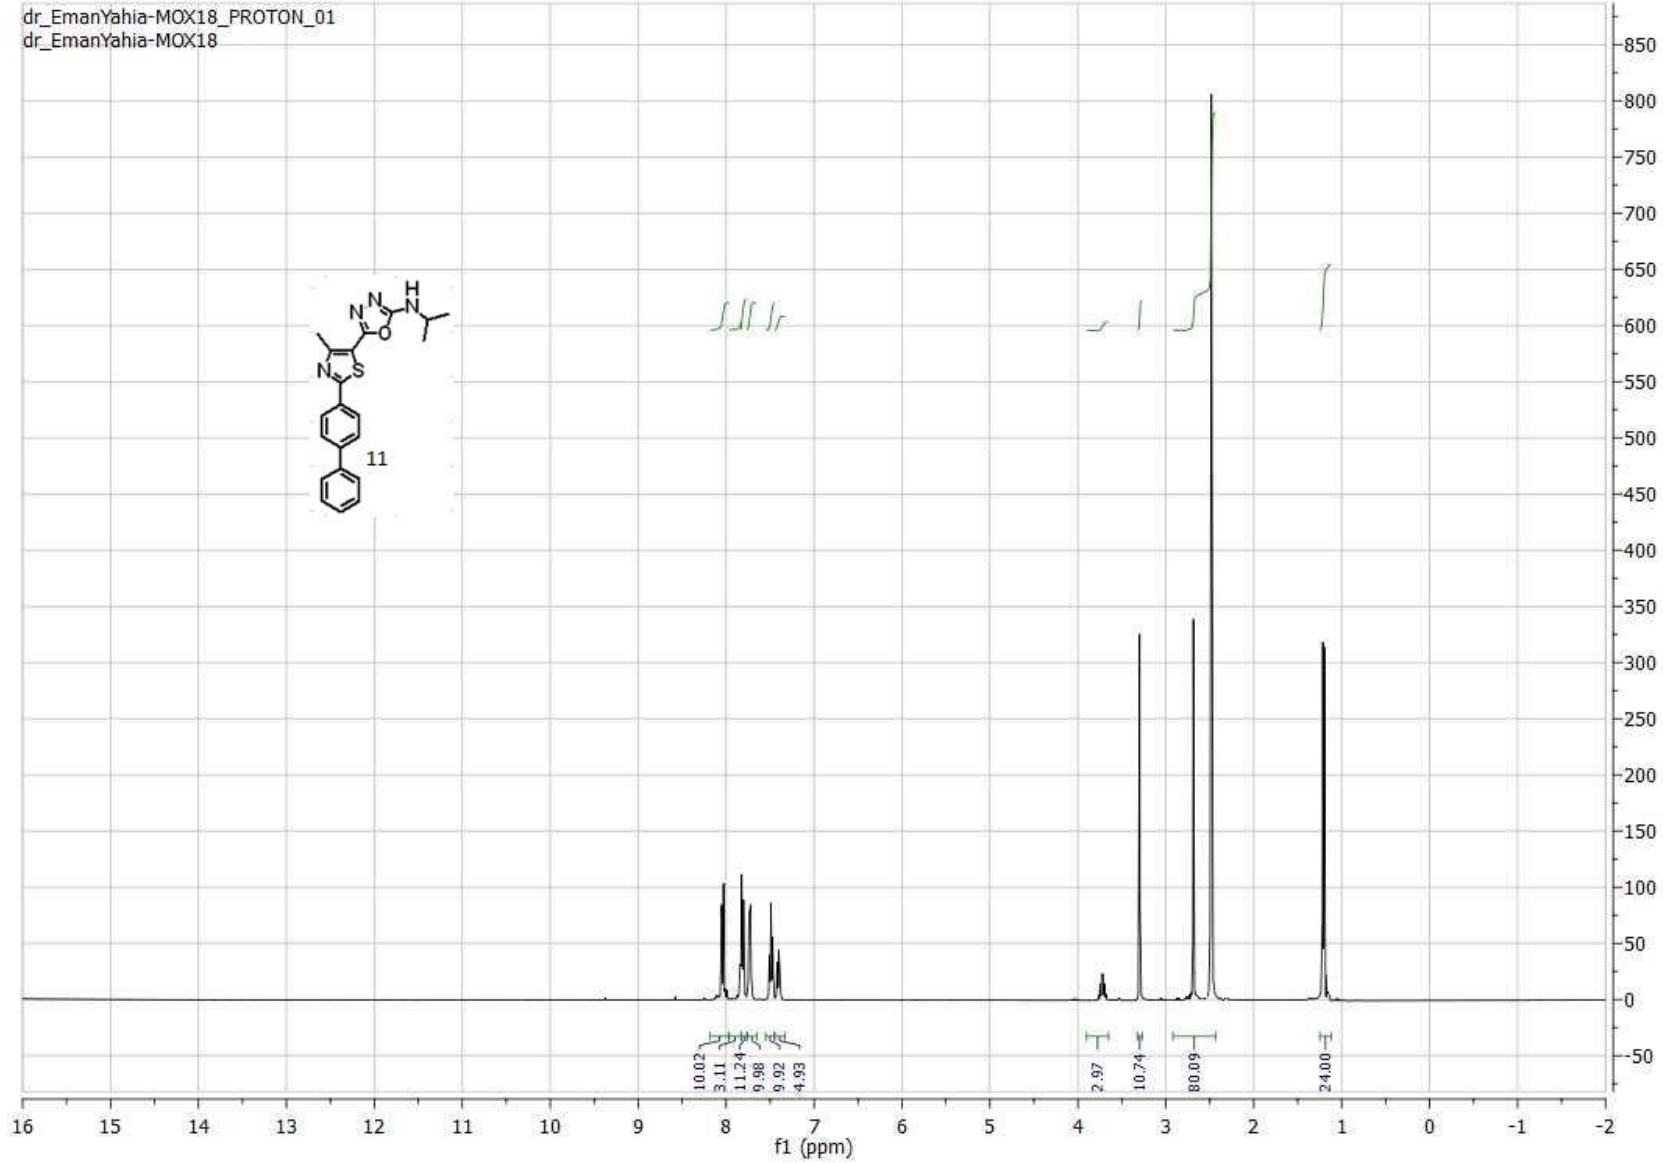

Dr\_EmanYahia-MOX18\_CARBO\_01  
Dr\_EmanYahia-MOX18

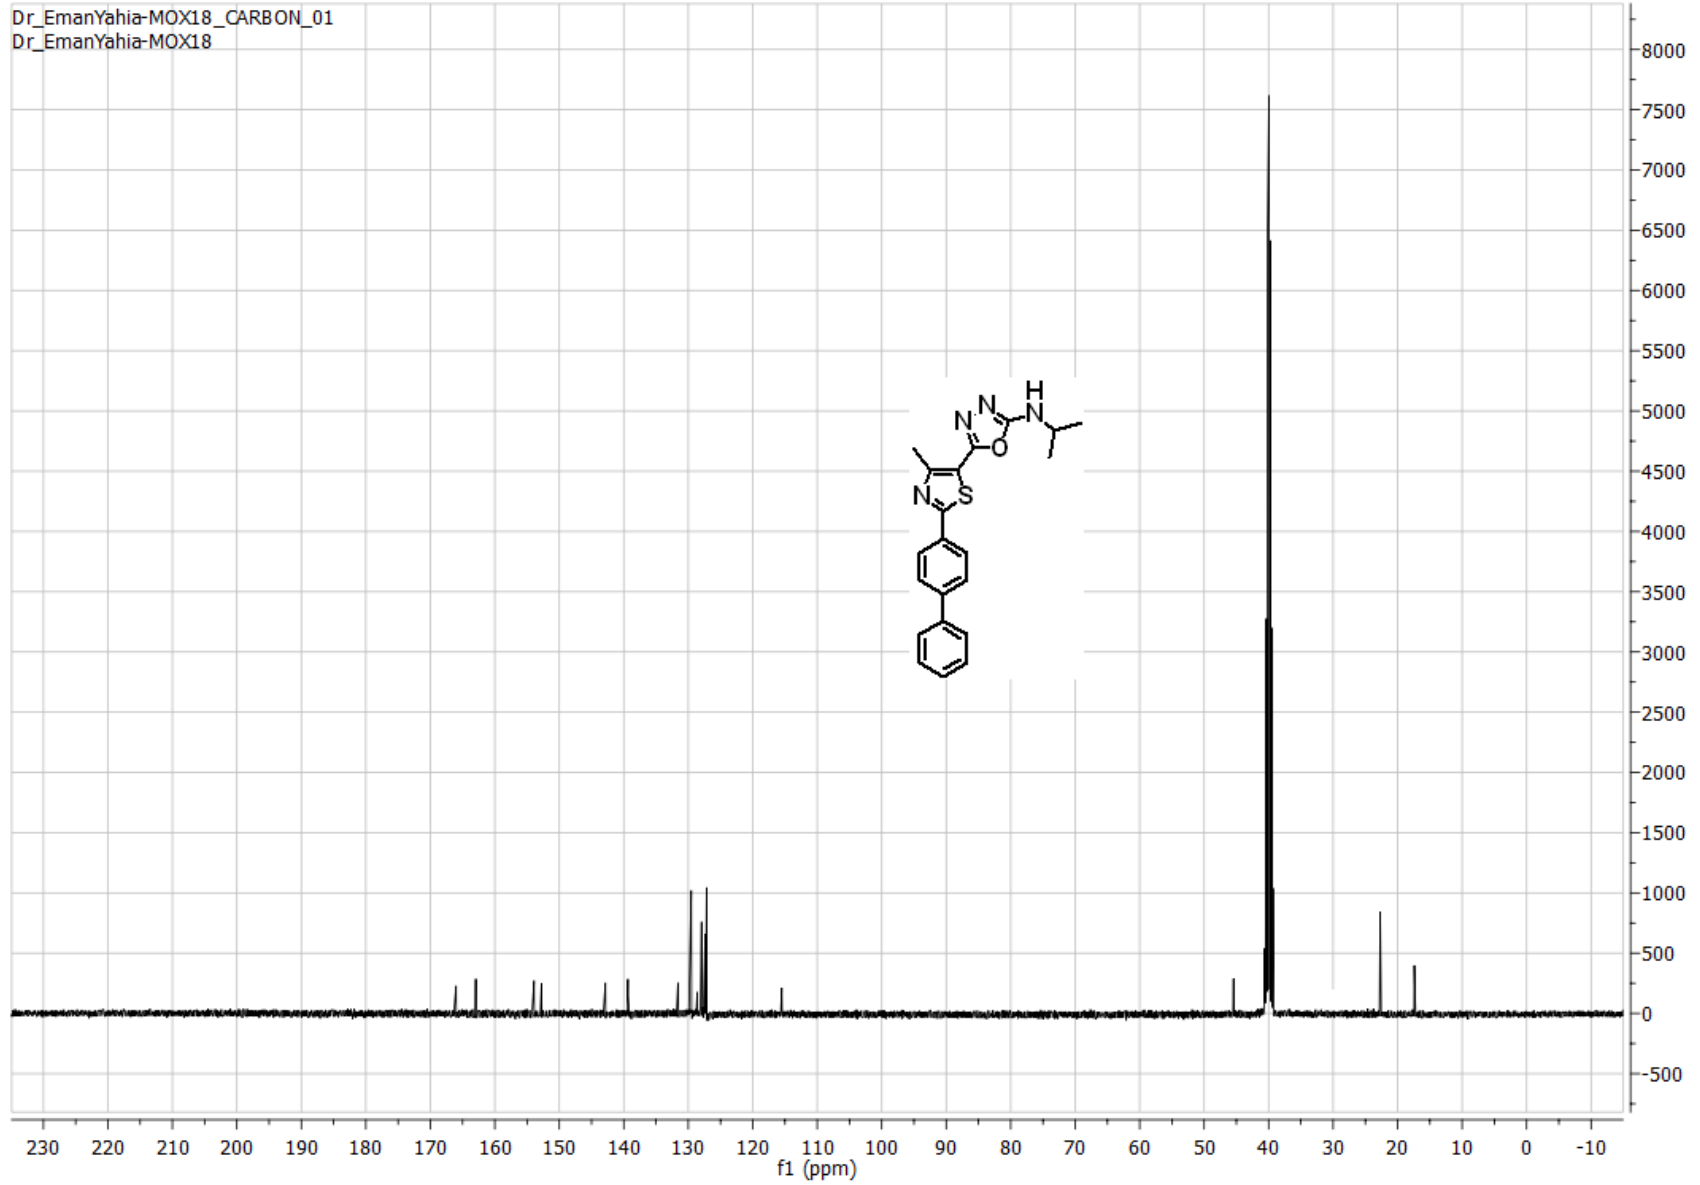

dr\_EmanYahia-MOX21\_PROTON\_01  
dr\_EmanYahia-MOX21

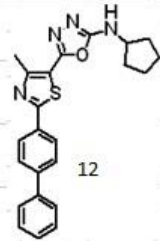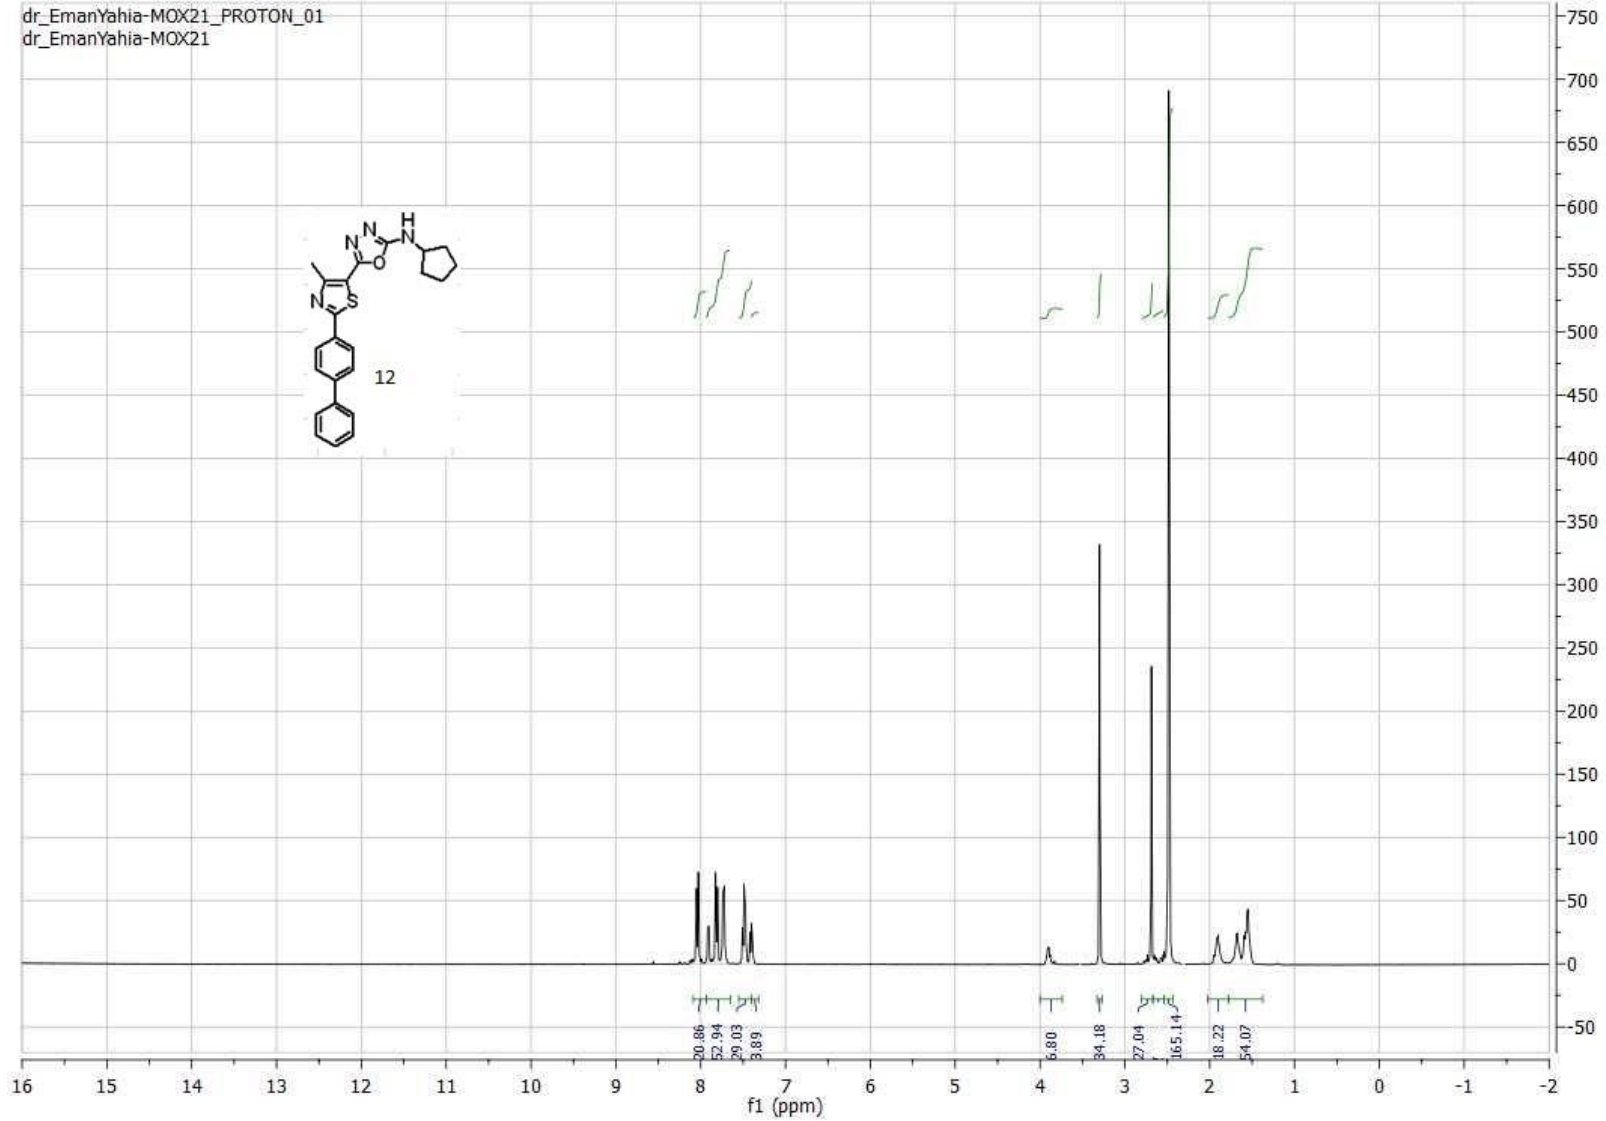



Dr\_EmanYahia-MOX21\_CARBON\_01  
Dr\_EmanYahia-MOX21

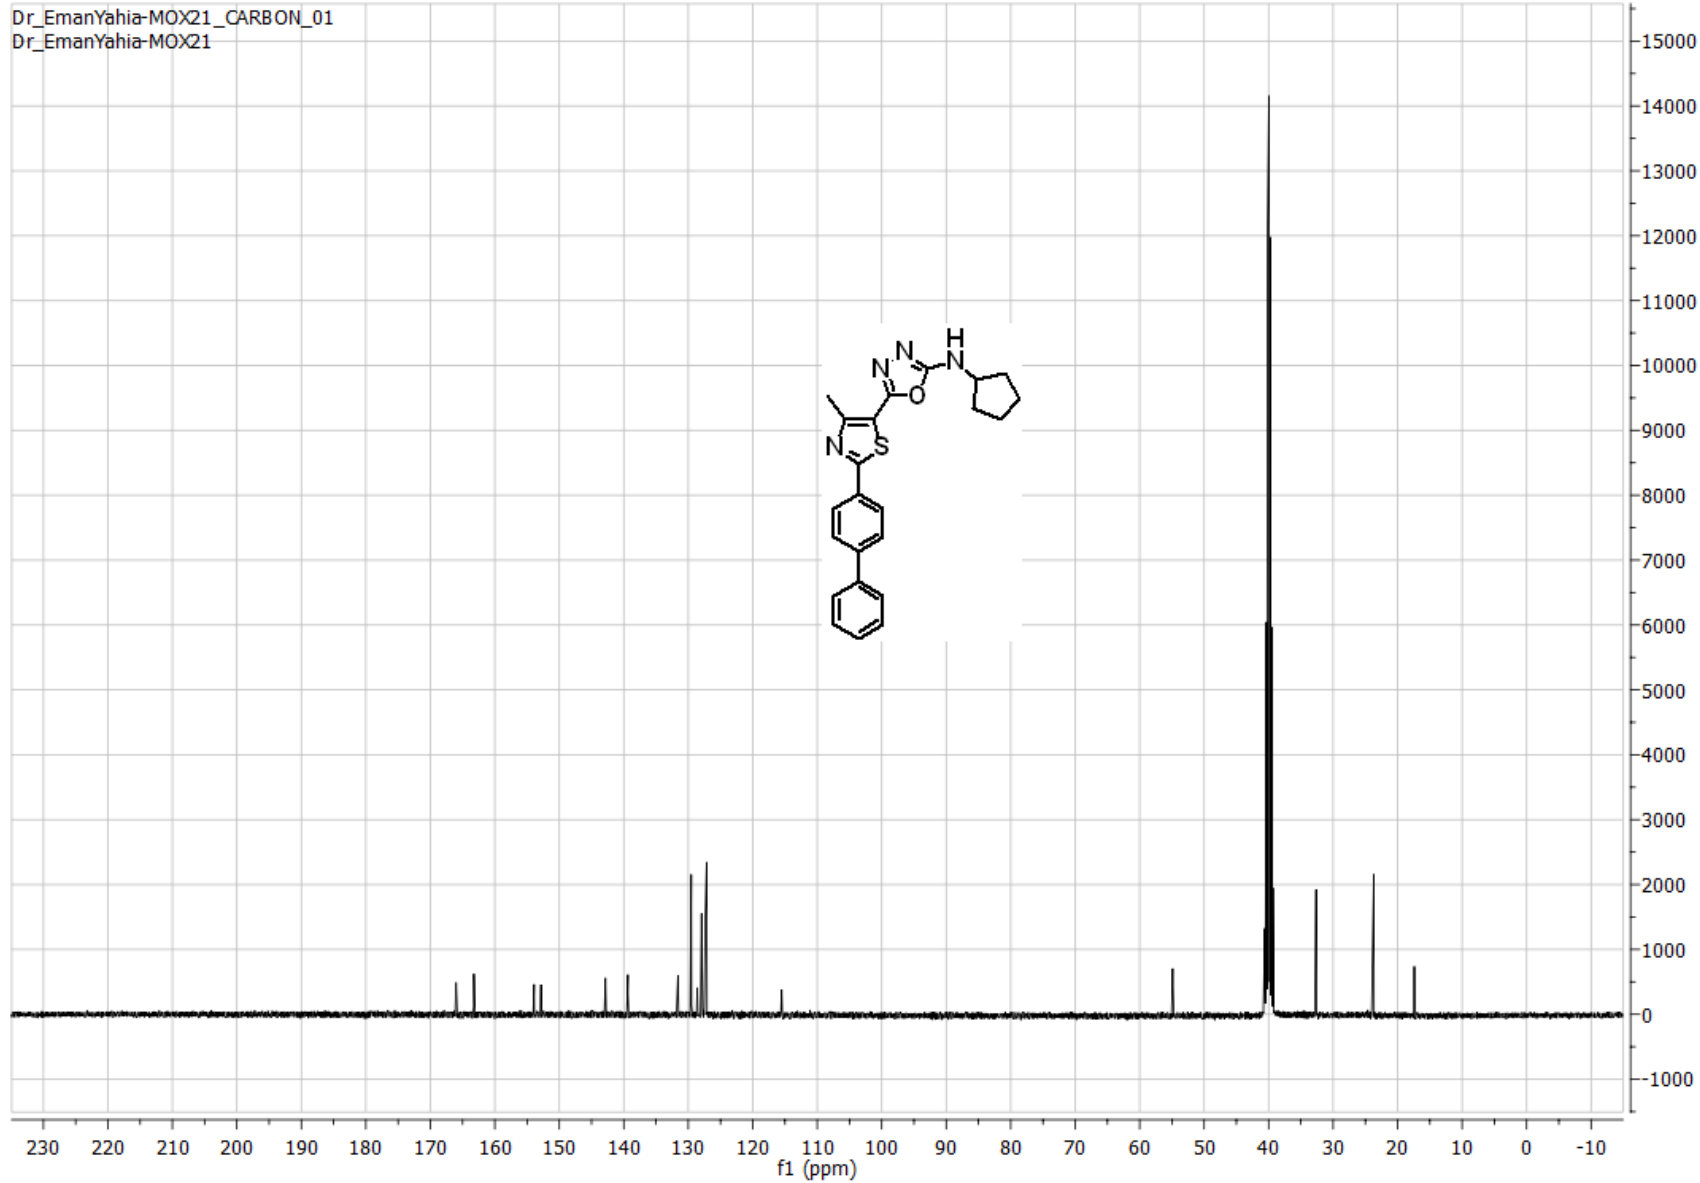

dr\_EmanYahia-MOX20\_PROTON\_01  
dr\_EmanYahia-MOX20

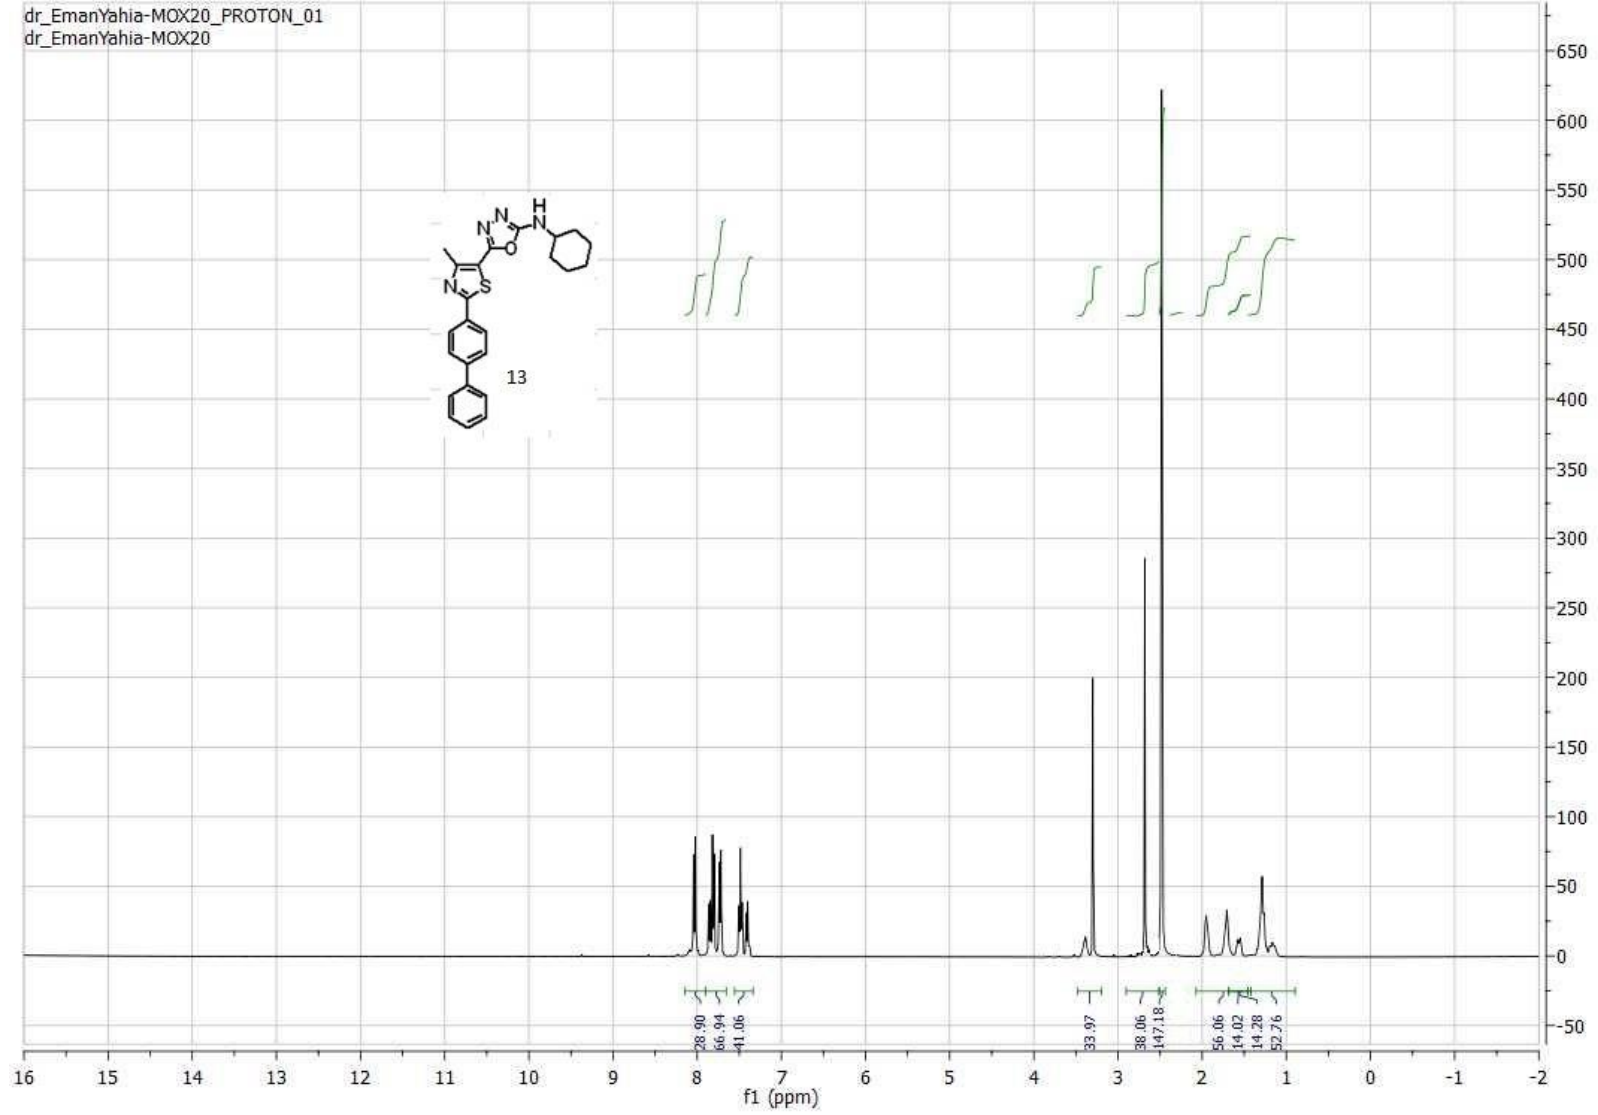

Dr\_EmanYahia-MOX20\_CARBO...  
Dr\_EmanYahia-MOX20

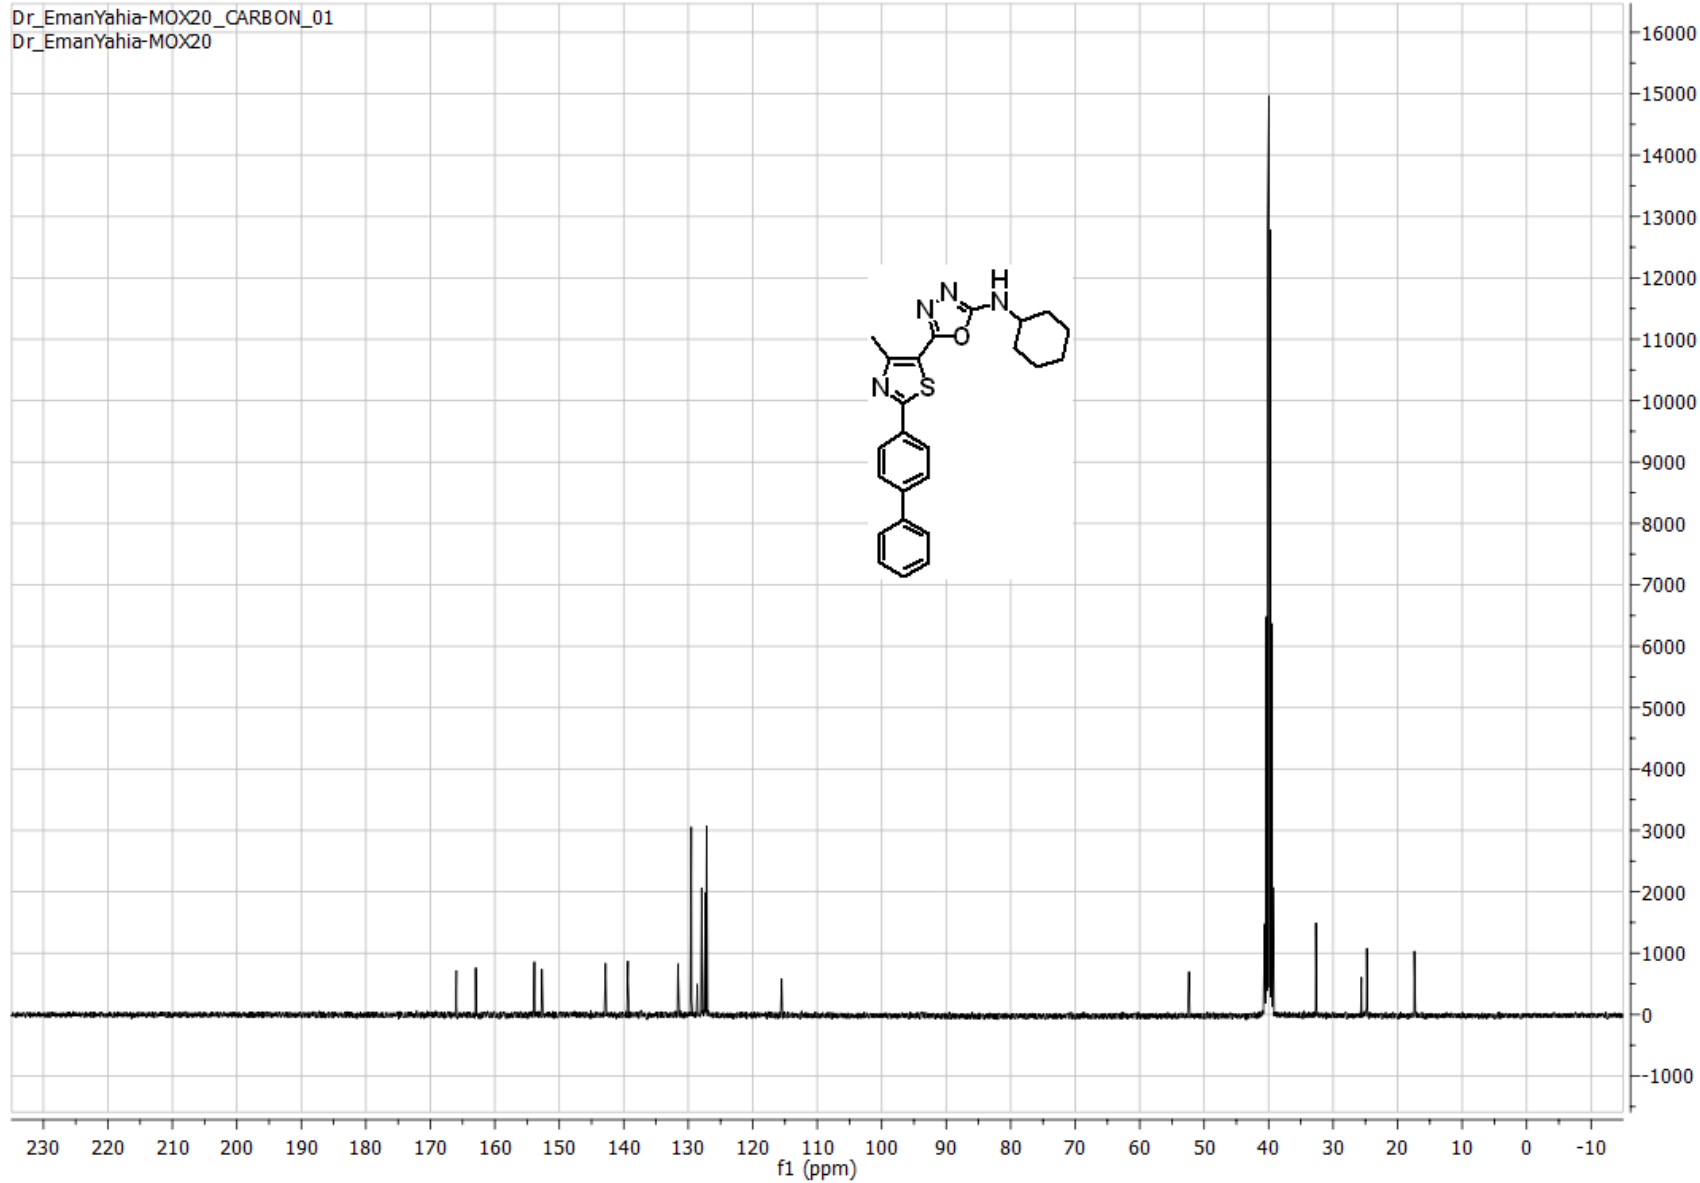

dr\_EmanYahia-MOX17\_PROTON\_01  
dr\_EmanYahia-MOX17

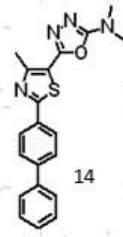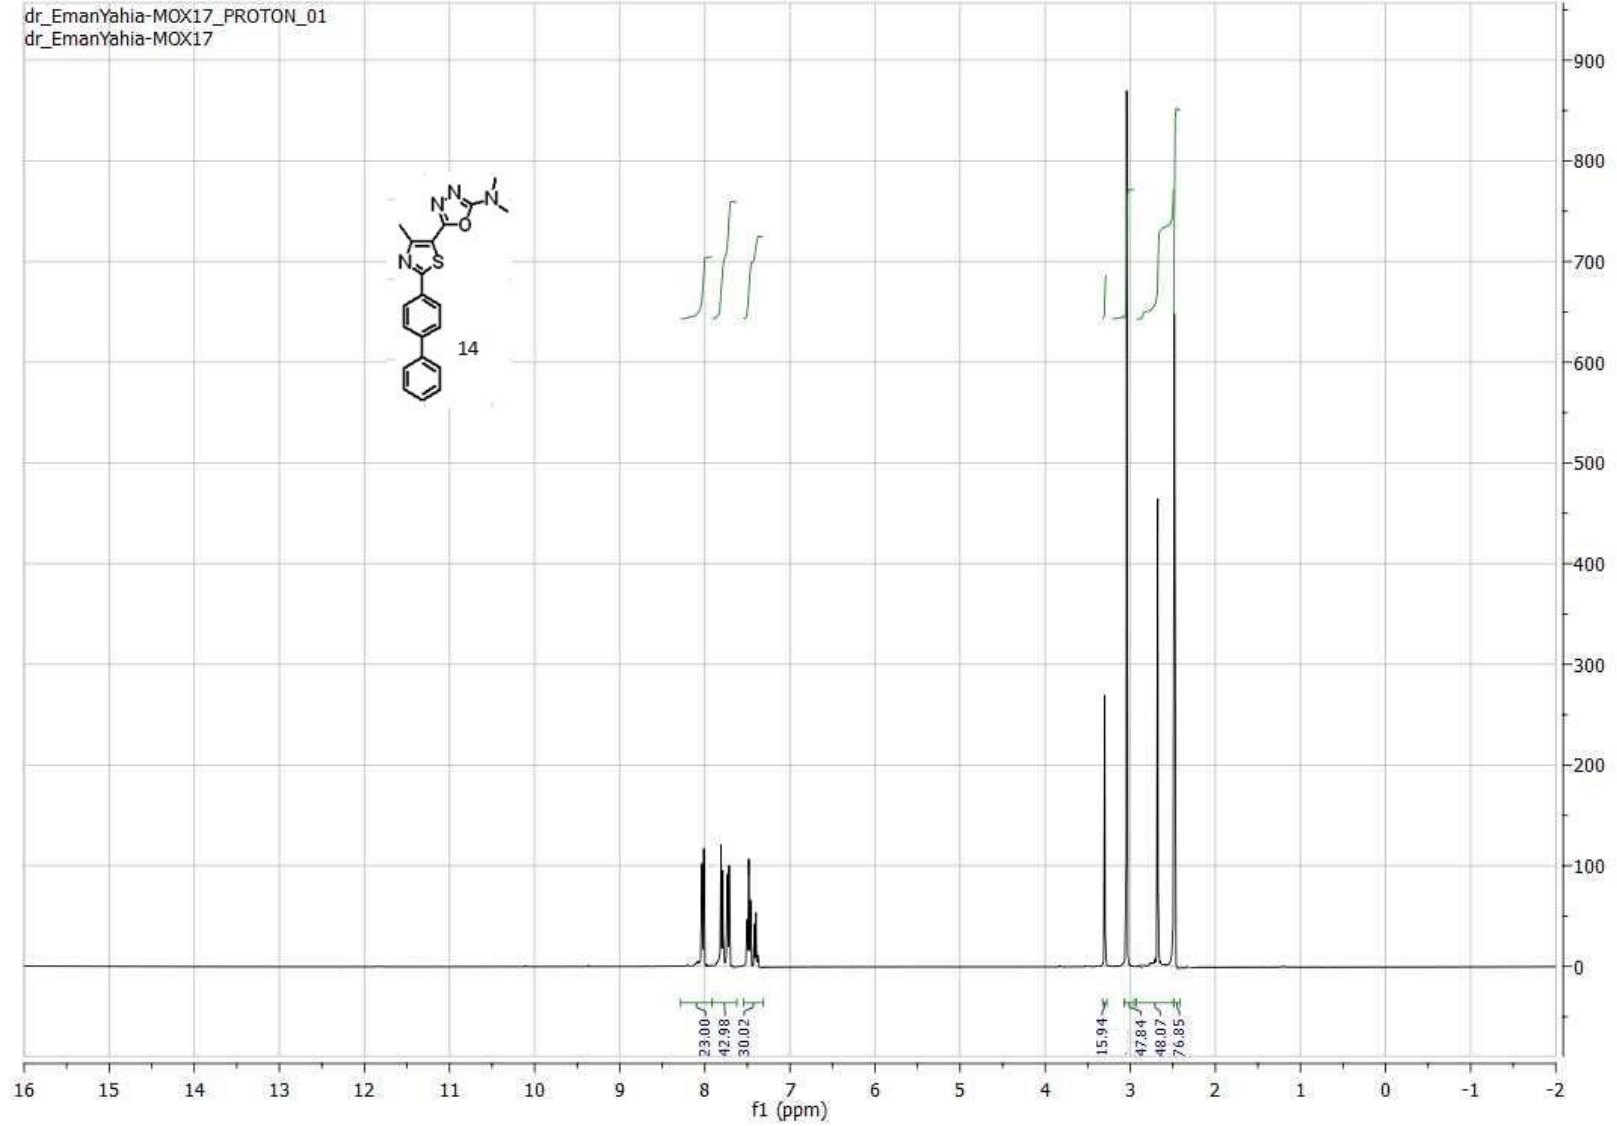

Dr\_EmanYahia-MOX17\_CARBON\_01  
Dr\_EmanYahia-MOX17

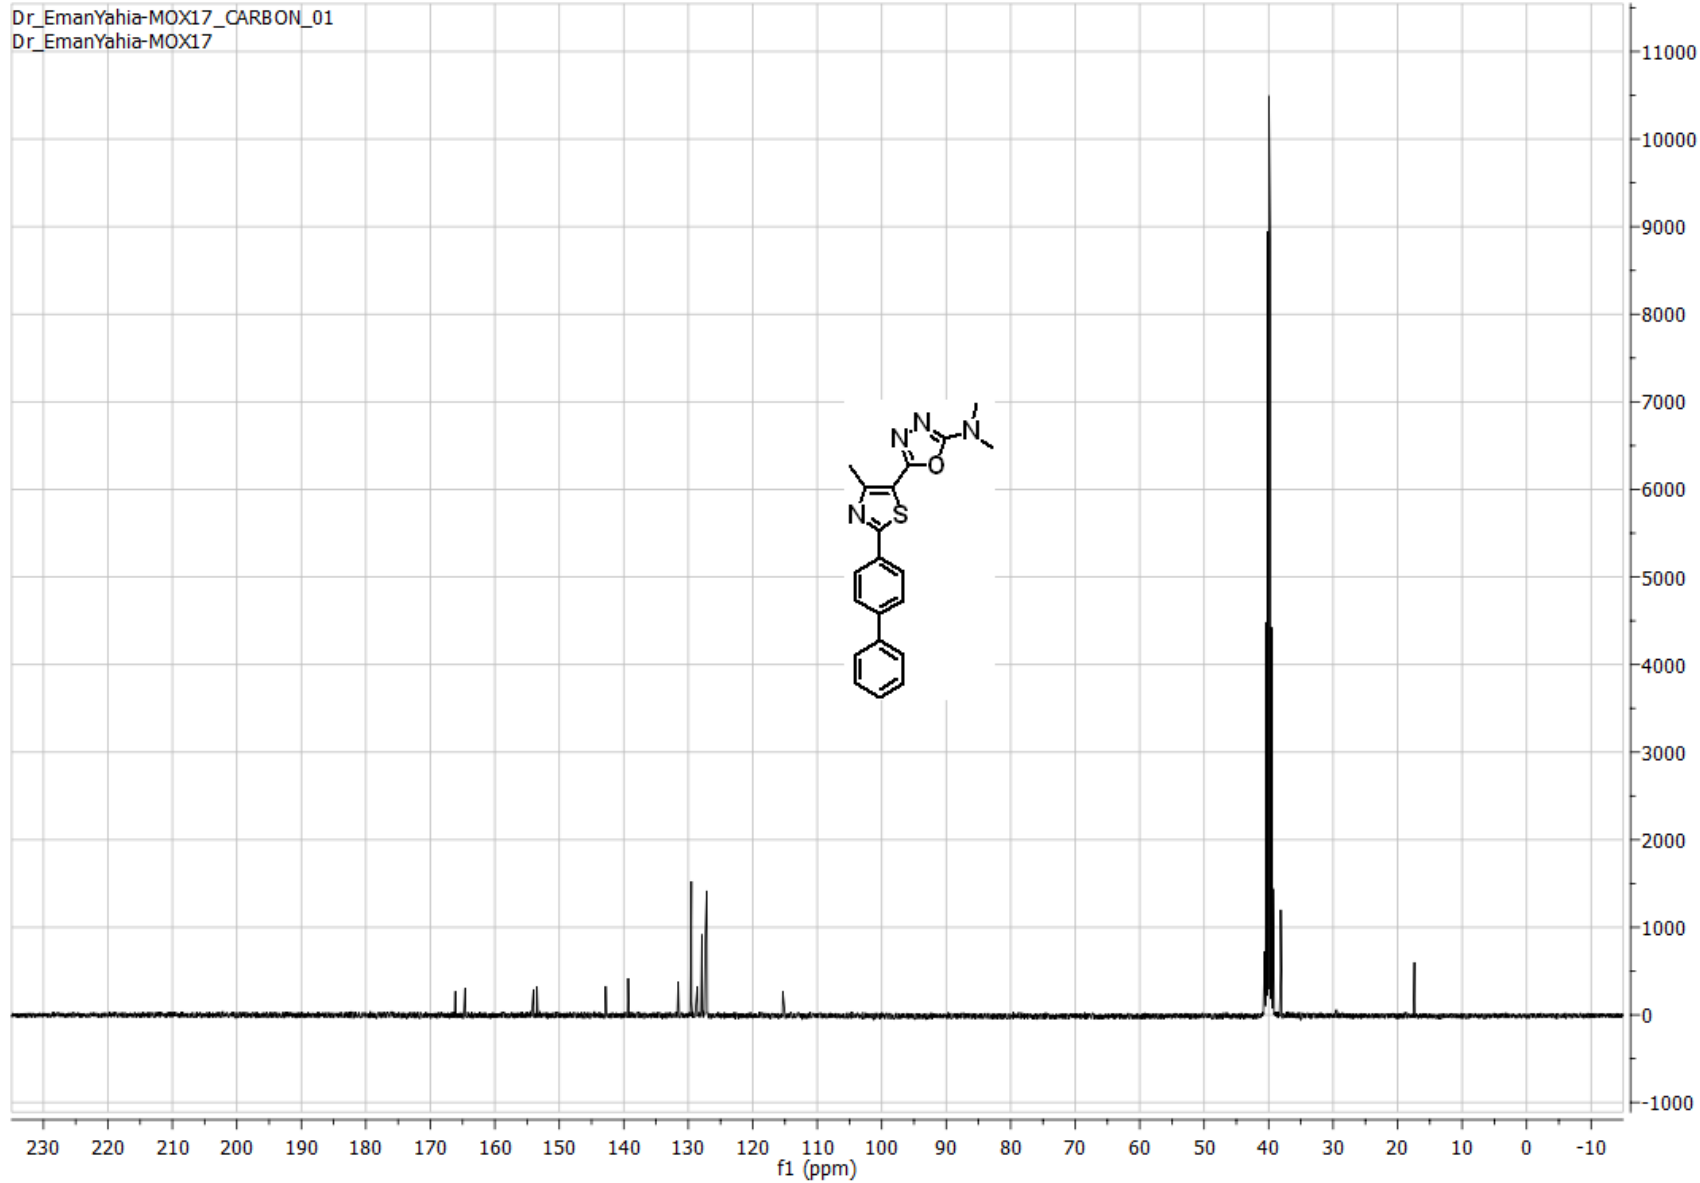

dr\_EmanYahia-MOX23\_PROTON\_01  
dr\_EmanYahia-MOX23

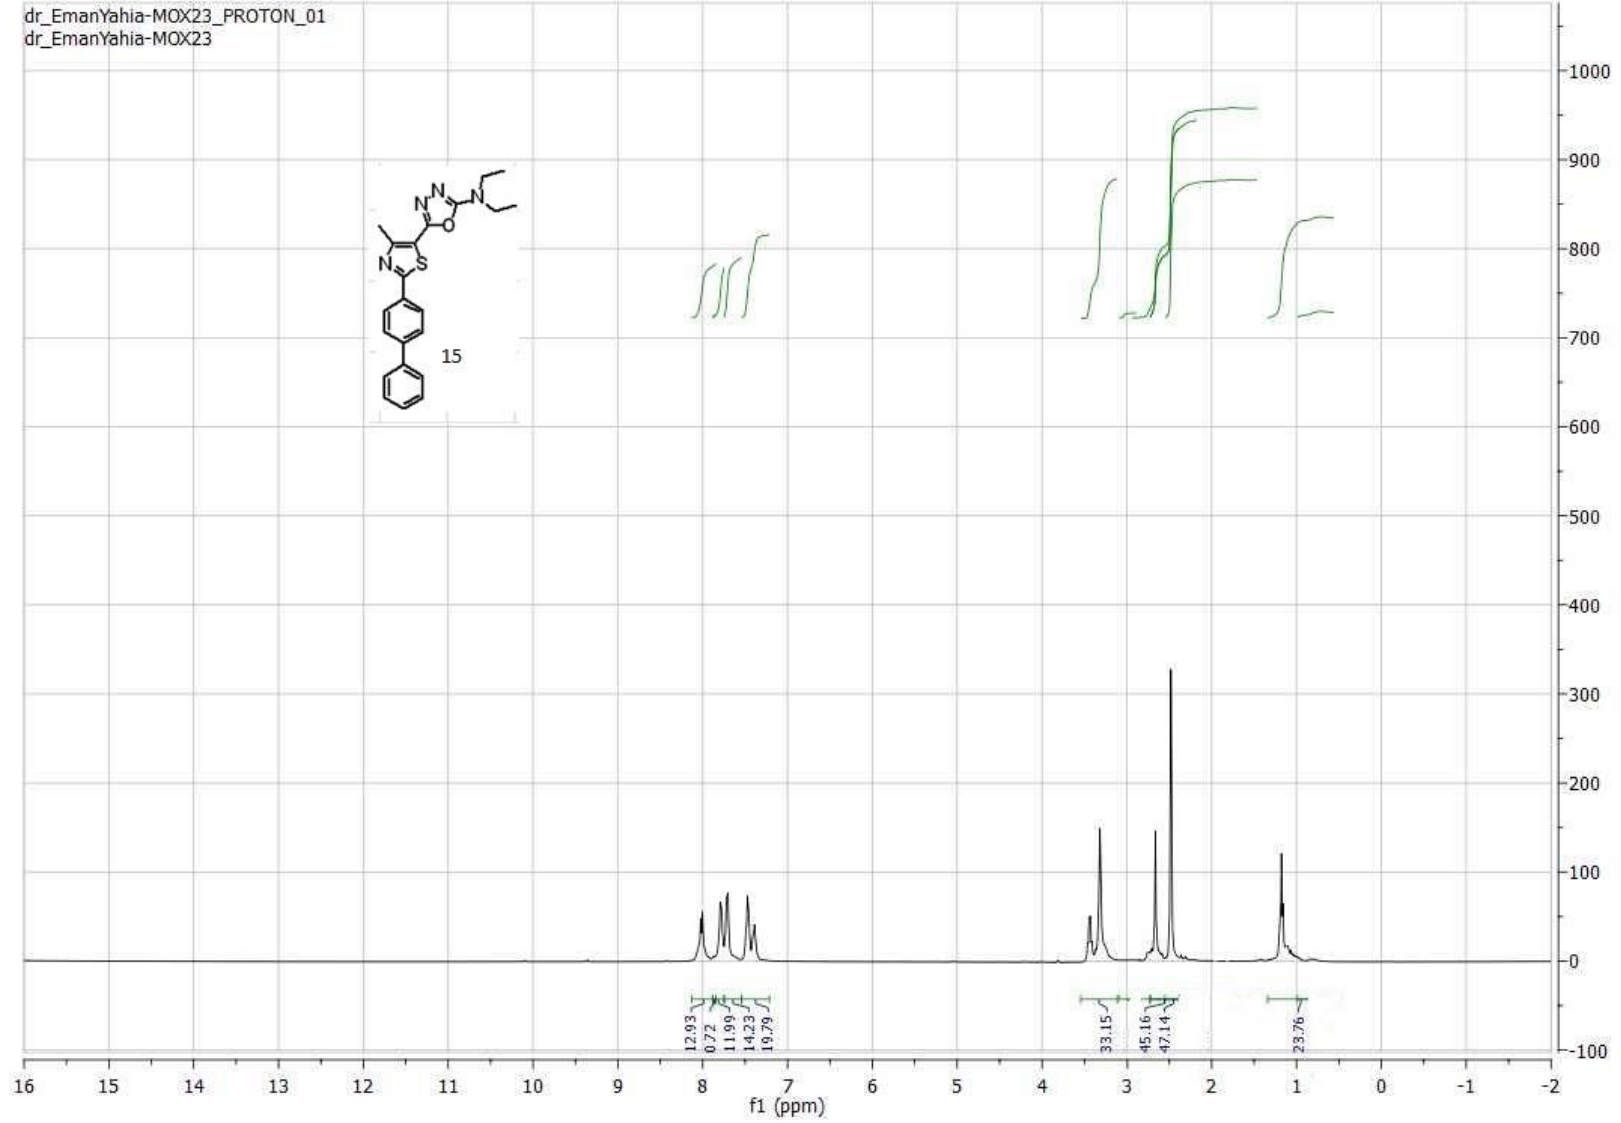

Dr\_EmanYahia-MOX23\_CARBON\_01  
Dr\_EmanYahia-MOX23

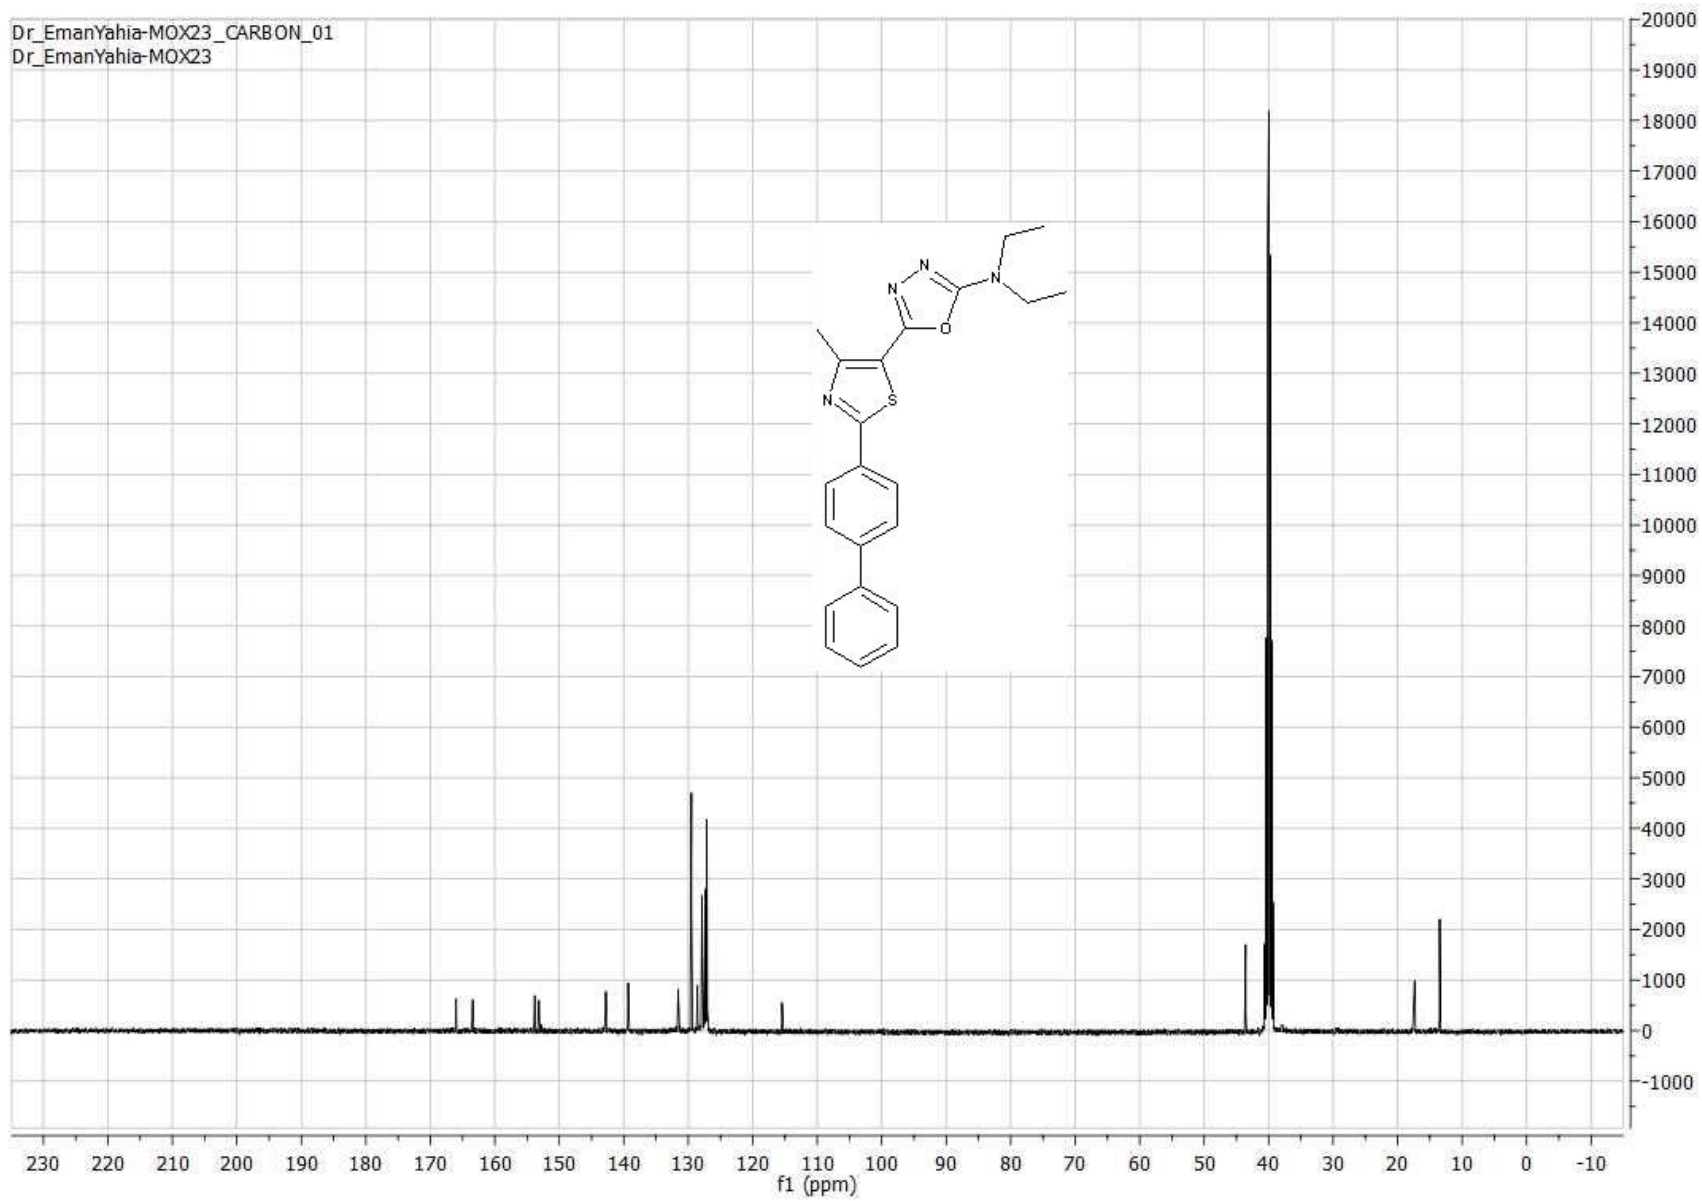





Dr\_MohamedHagrass-MOX25\_CARBON\_01  
Dr\_MohamedHagrass-MOX25

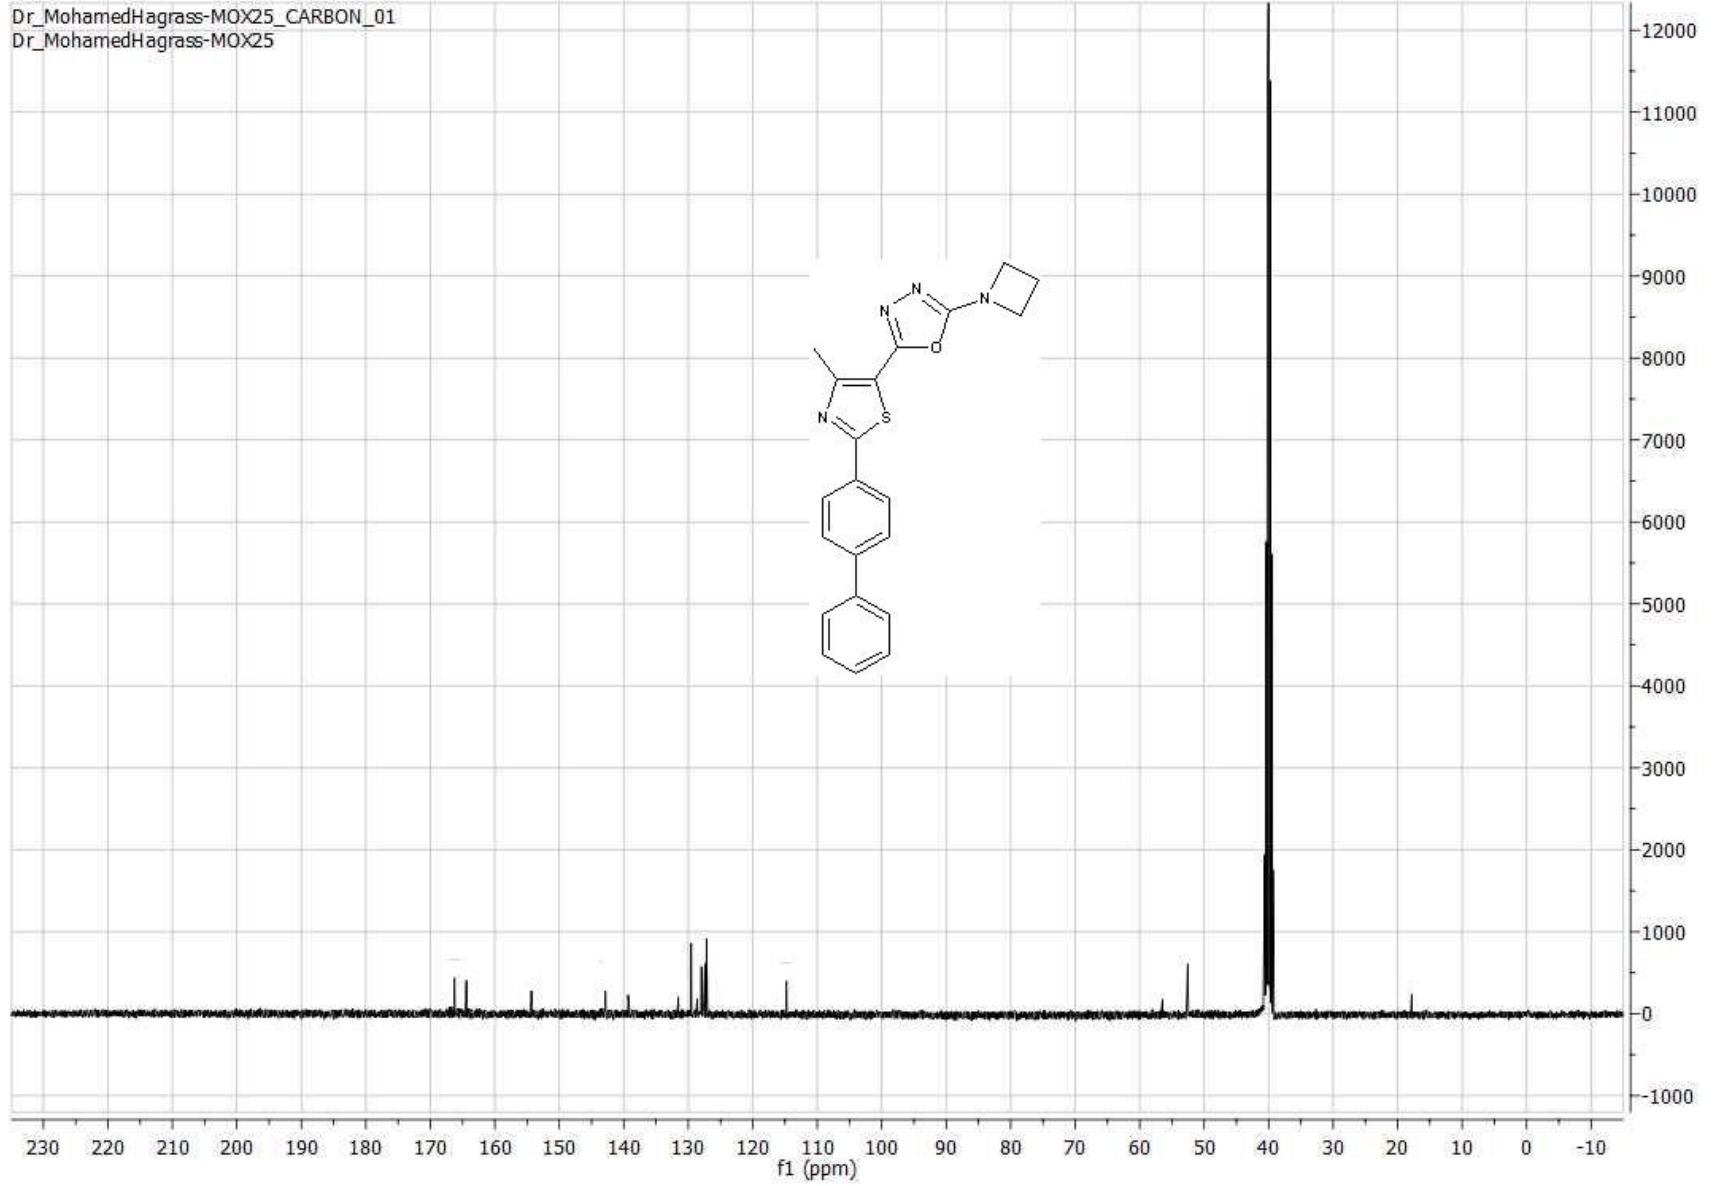

Dr\_MohamedHagrass-MOX24\_PROTON\_01  
Dr\_MohamedHagrass-MOX24

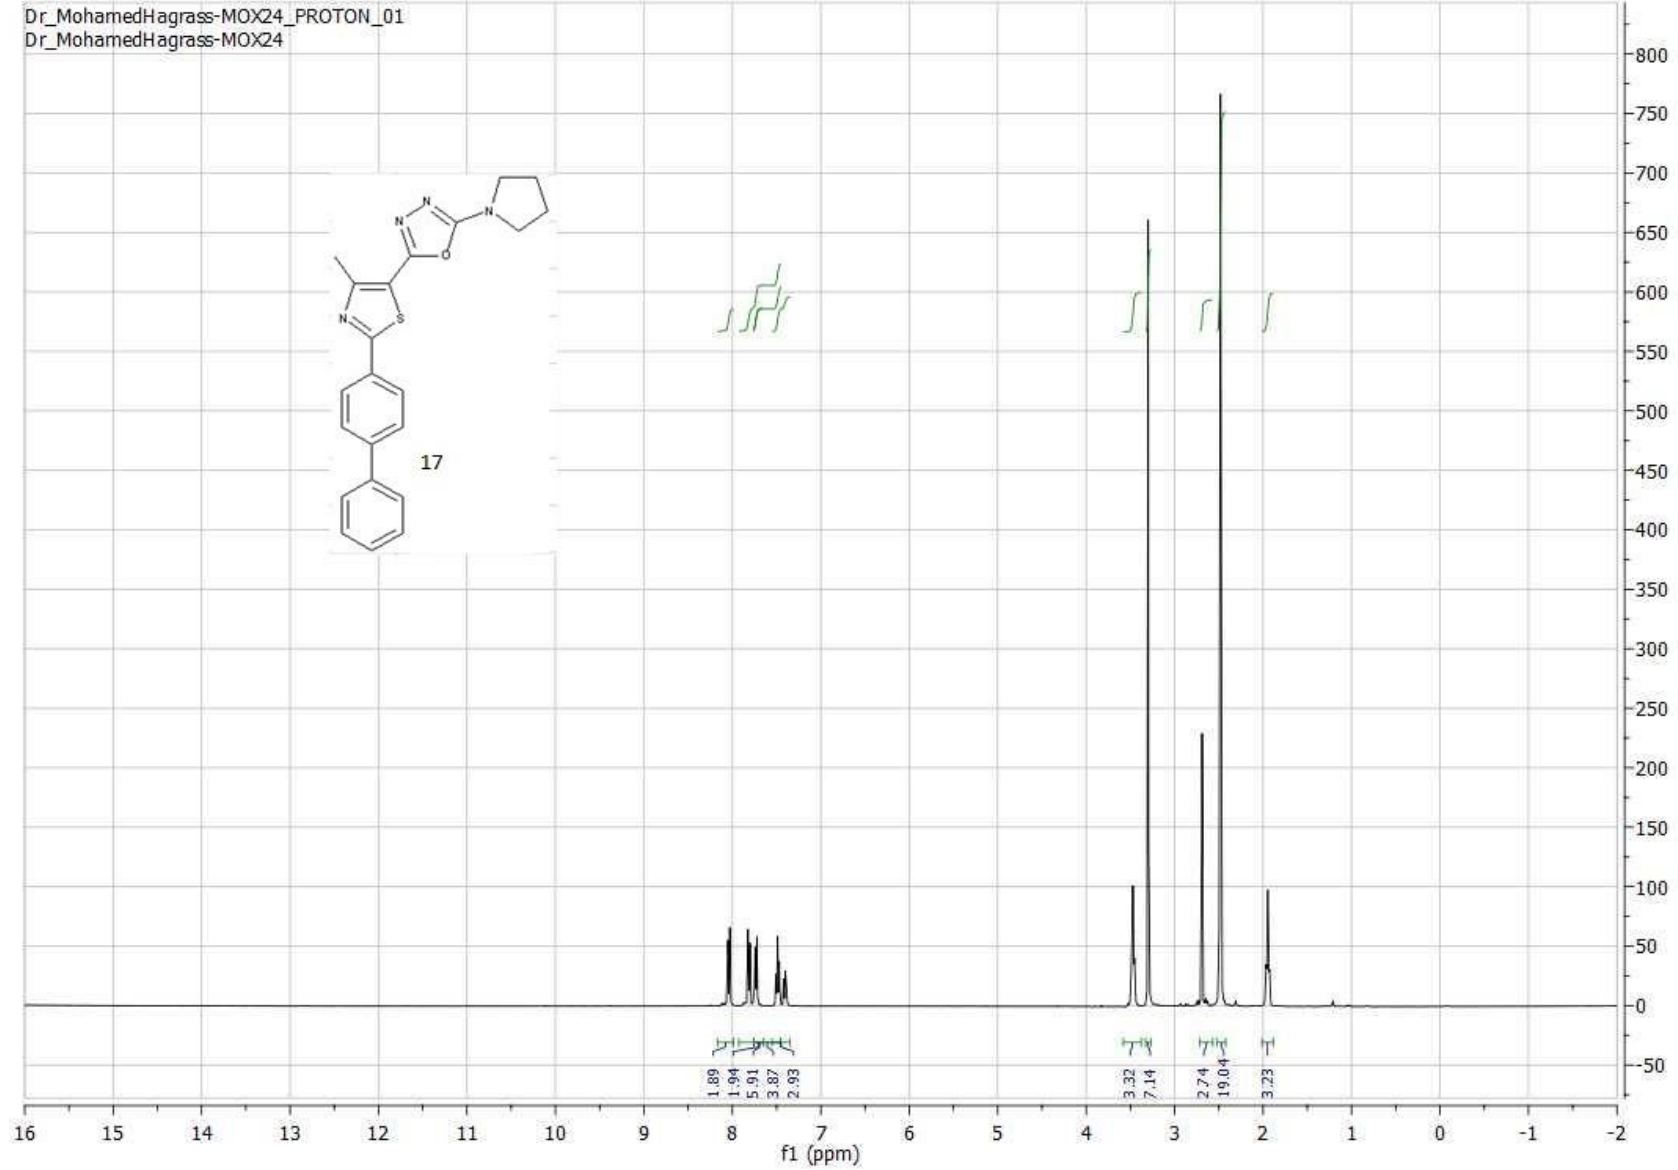

Dr\_MohamedHagress-MOX24 \_CARBON\_01  
Dr\_MohamedHagress-MOX24

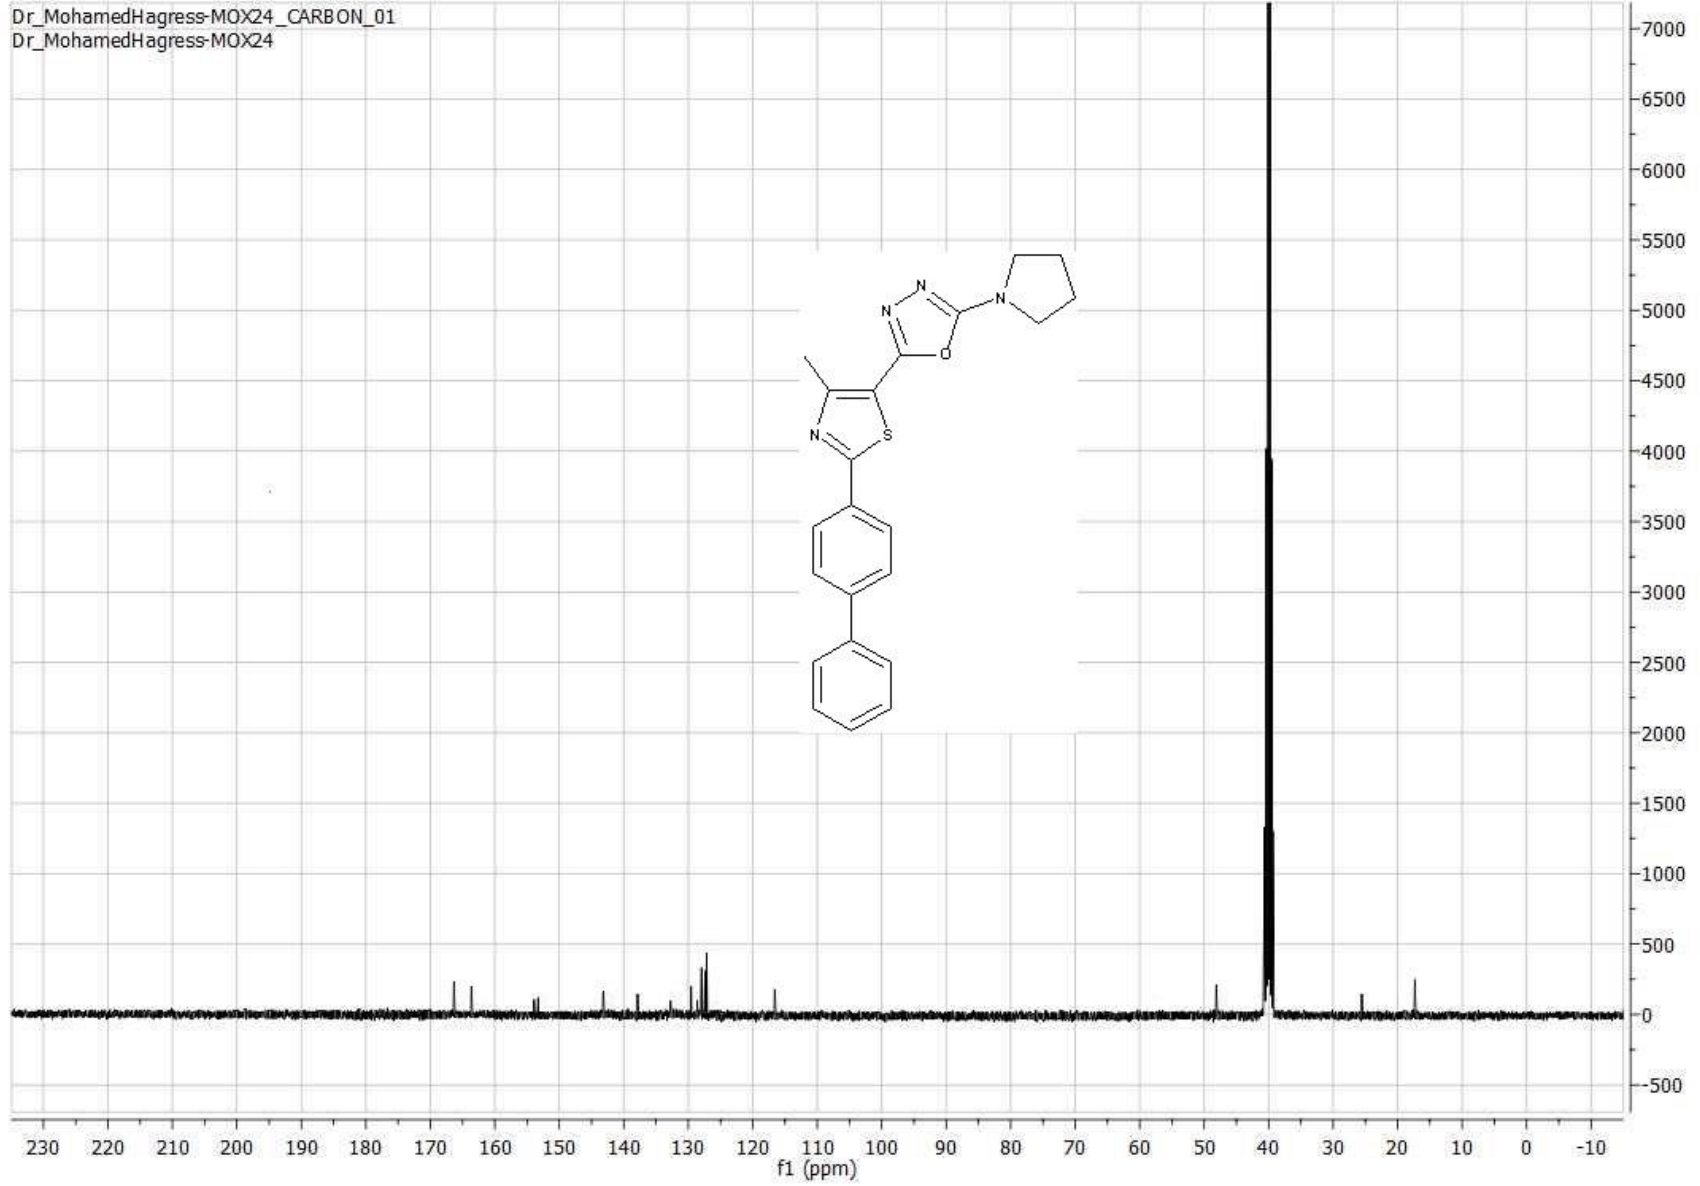

Dr\_EmanYaiha-MOX14\_PROTON\_01  
Dr\_EmanYaiha-MOX14

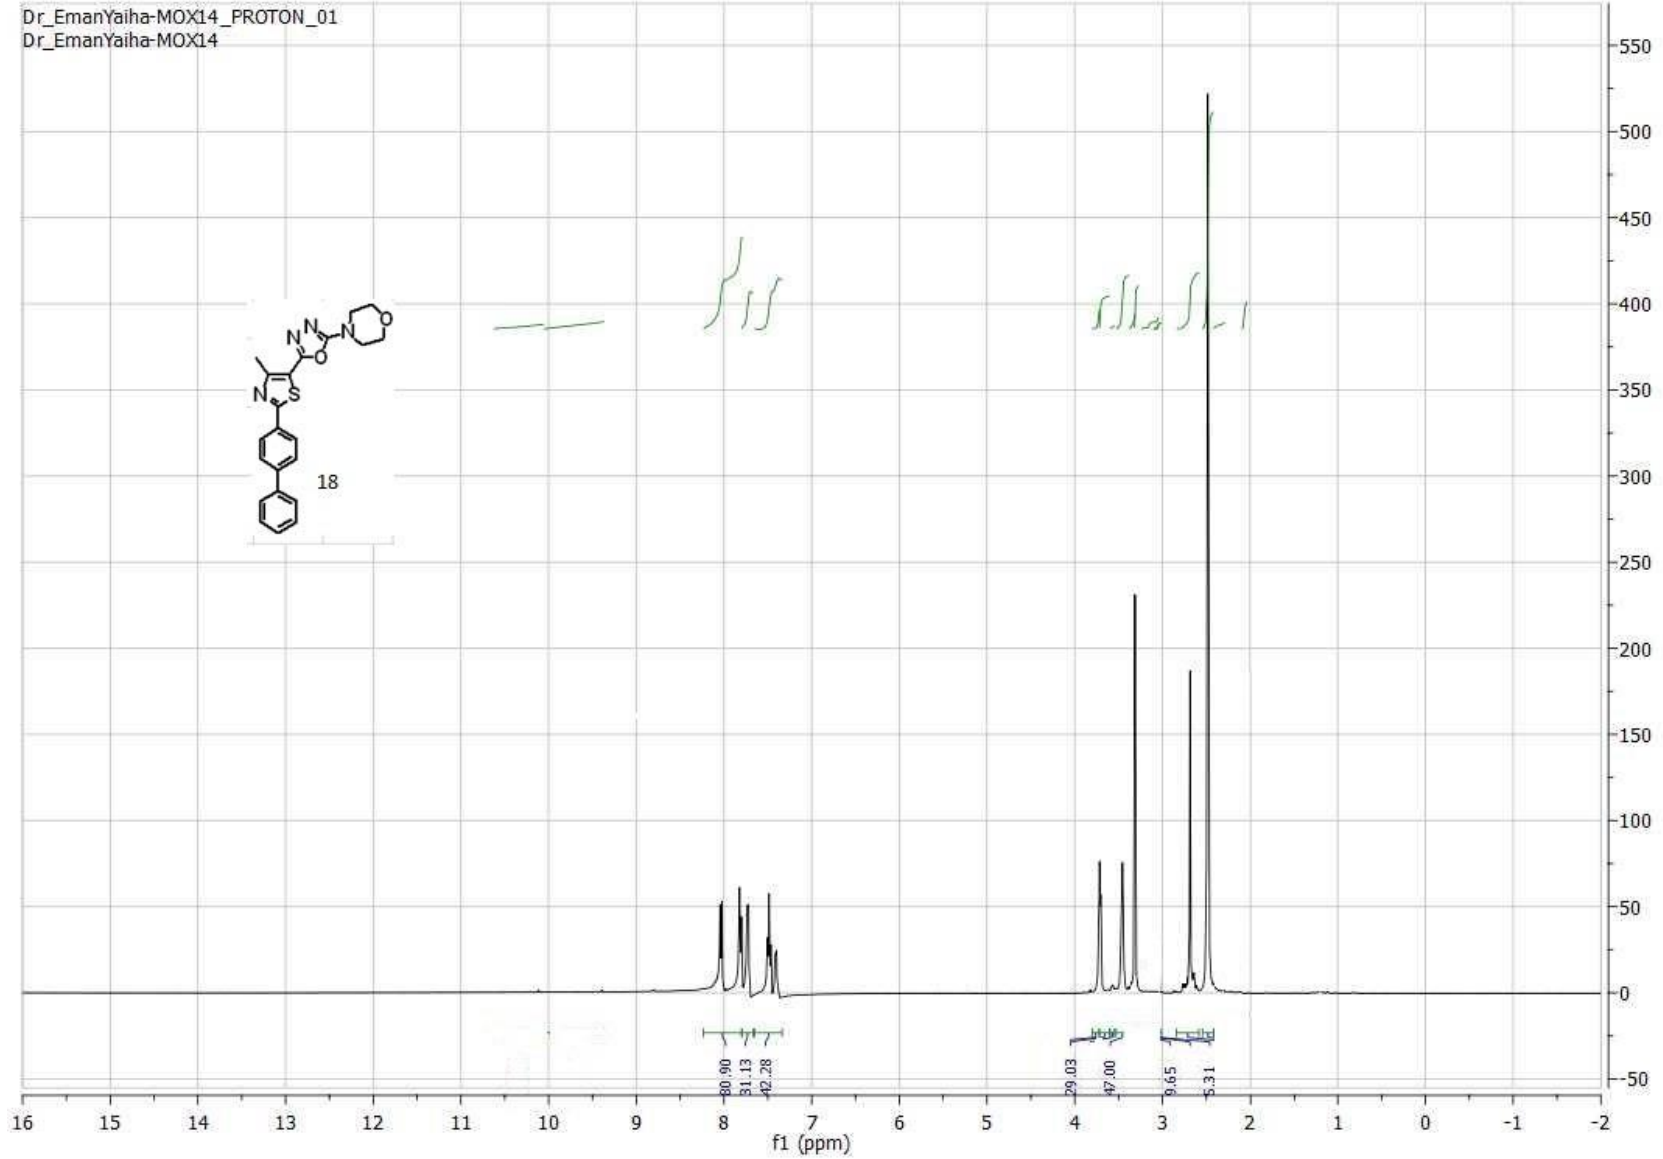

Dr\_EmanYahia-MOX14\_CARBON\_01  
Dr\_EmanYahia-MOX14

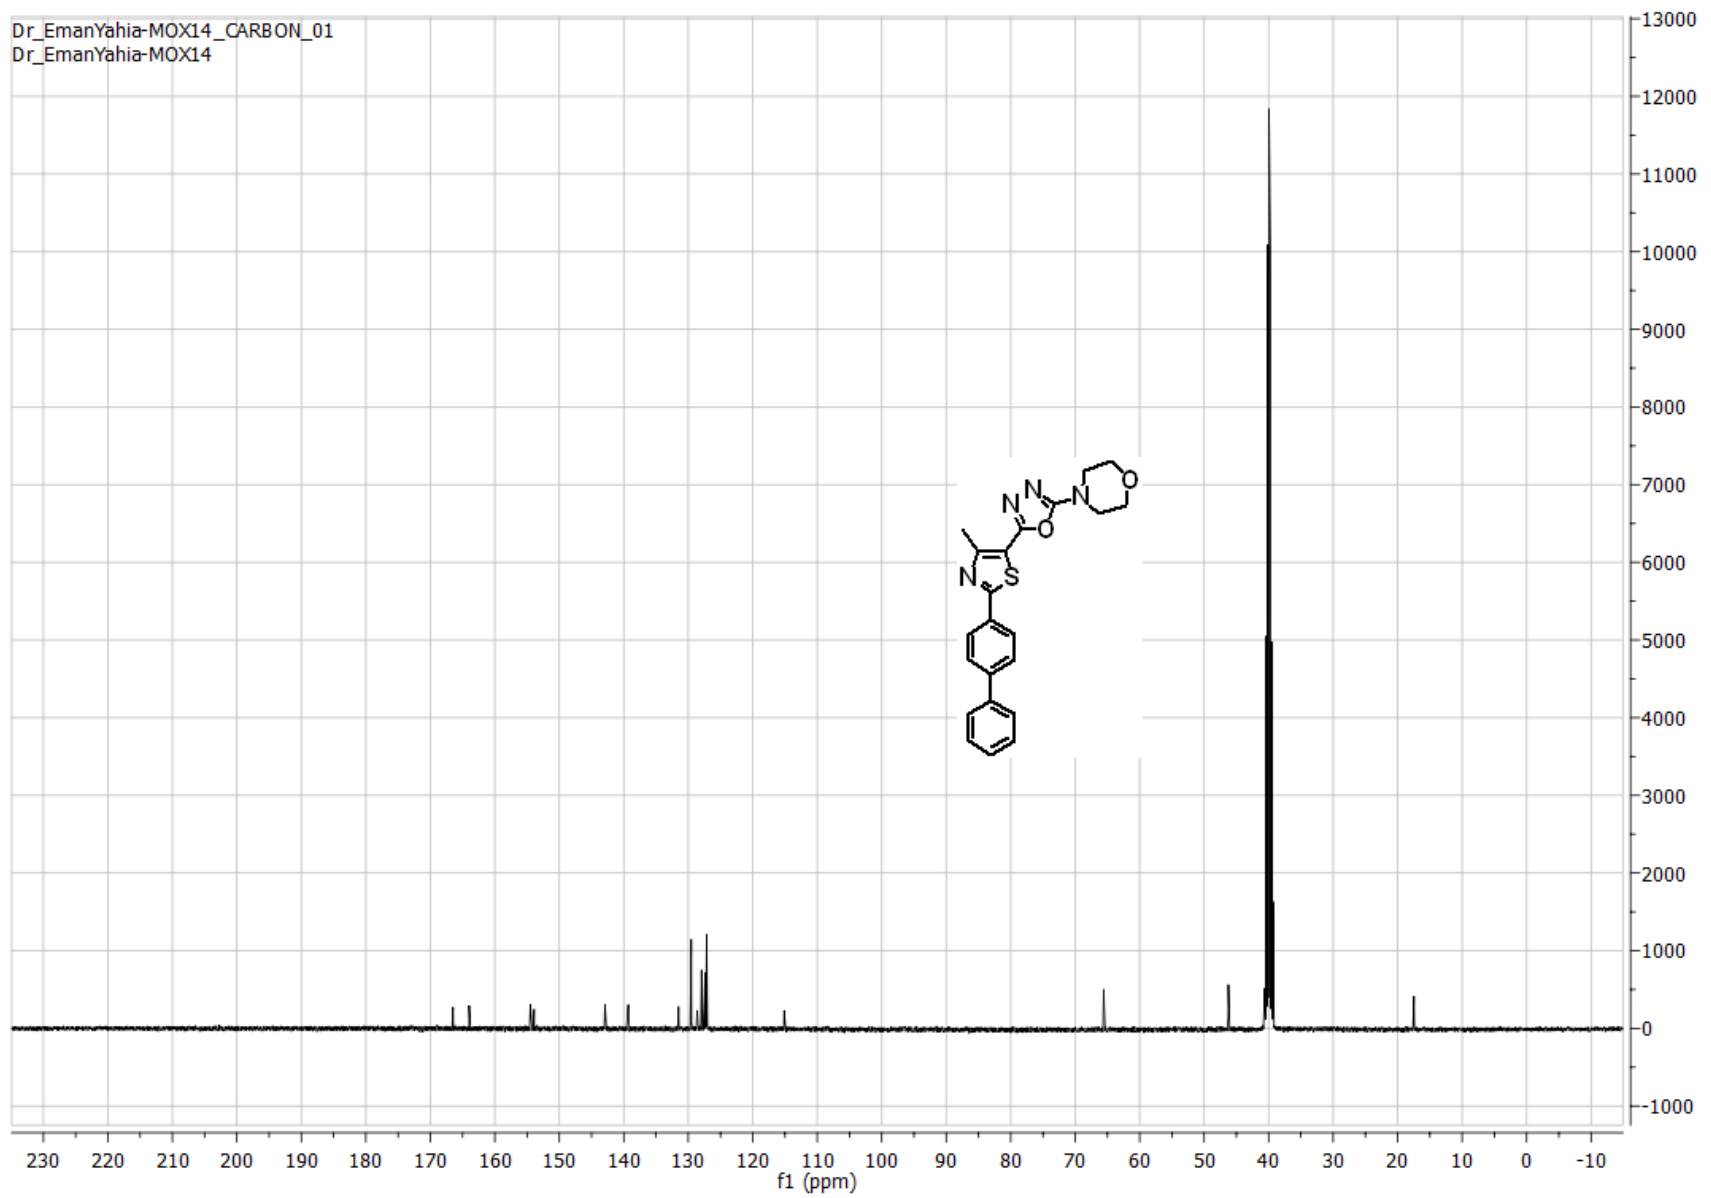

Dr\_MohamedHagrass-MOX26\_PROTON\_01  
Dr\_MohamedHagrass-MOX26

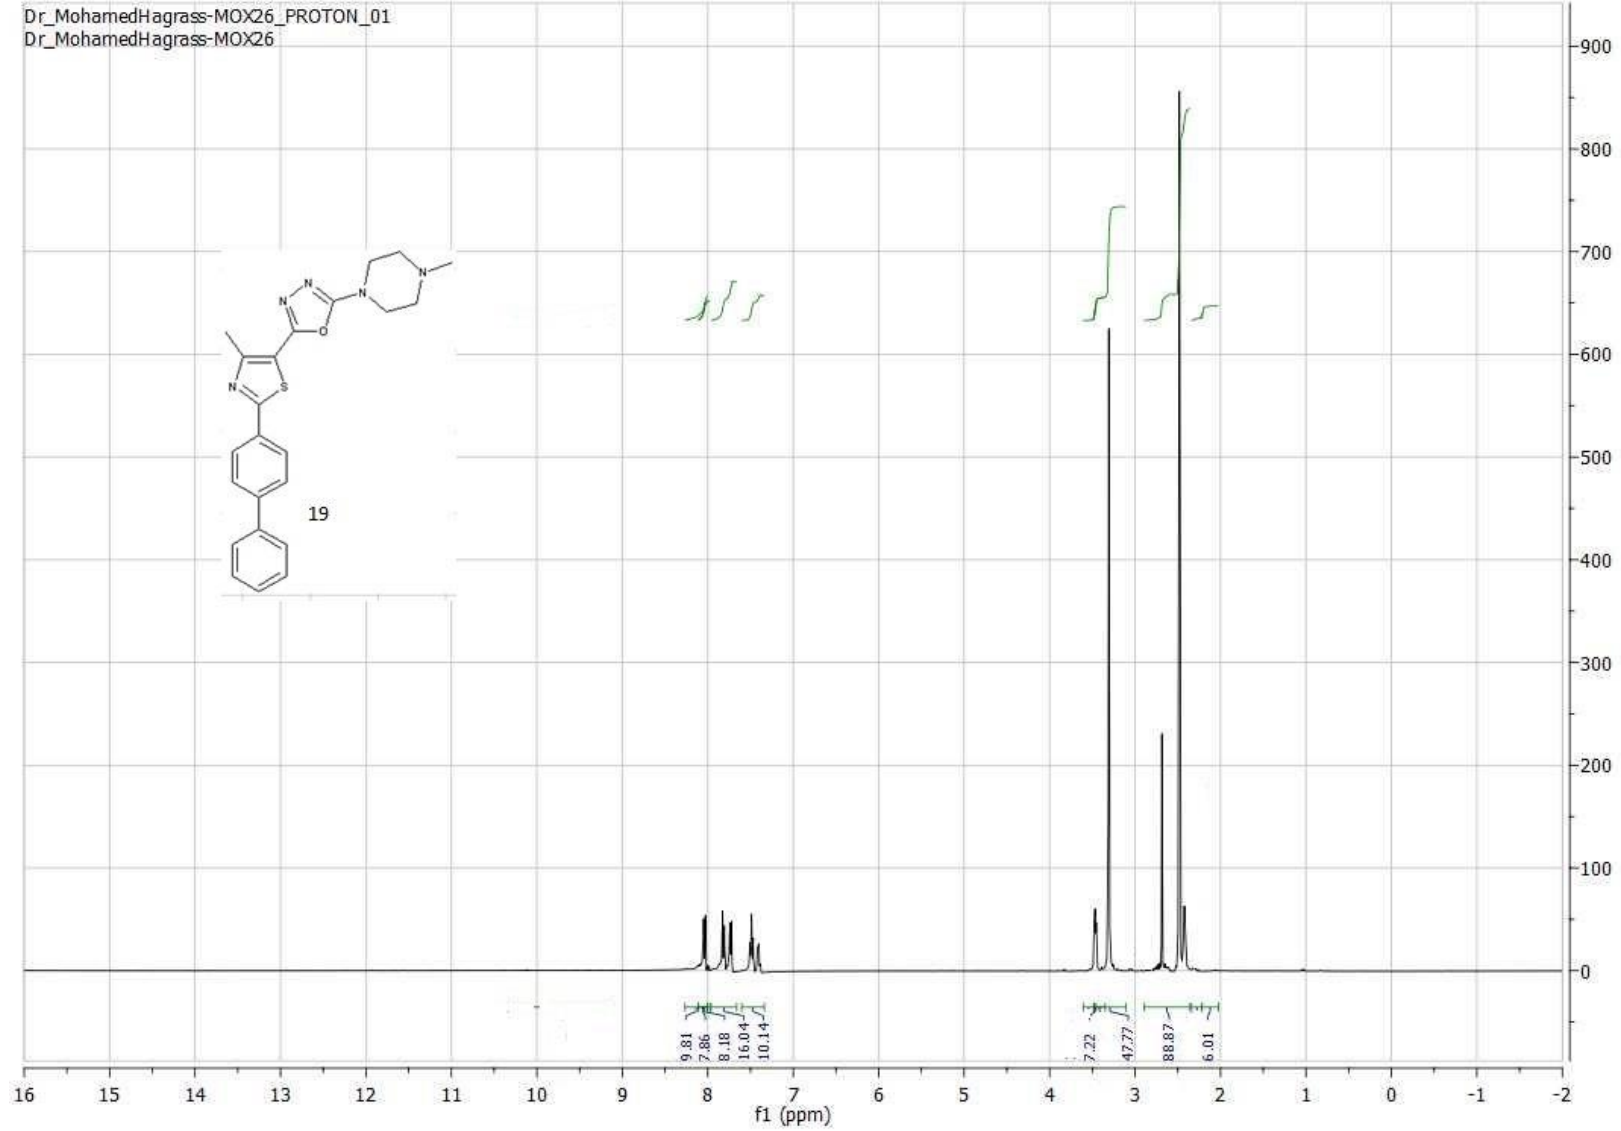

Dr\_MohamedHagress-Mox26\_CARBON\_01  
Dr\_MohamedHagress-Mox26

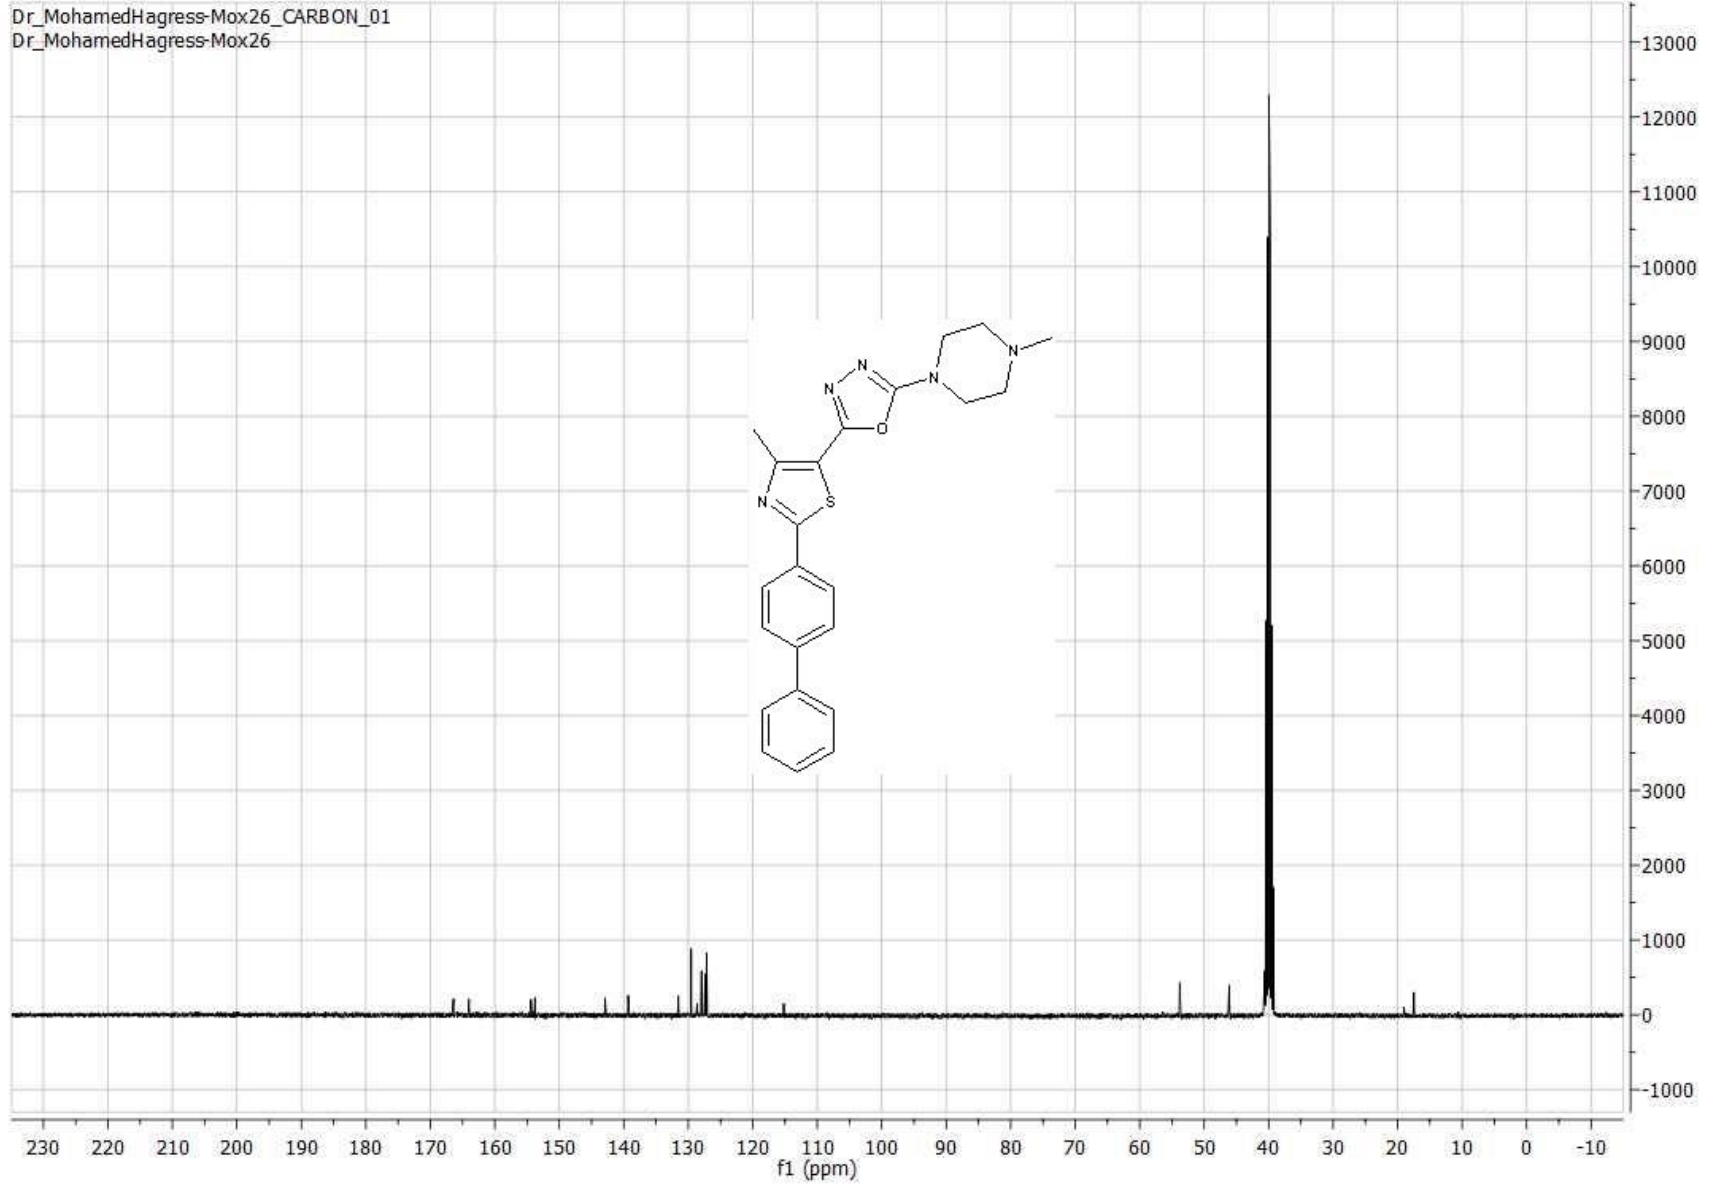

Dr\_MohamedHagrass-MOX35\_PROTON\_01  
Dr\_MohamedHagrass-MOX35

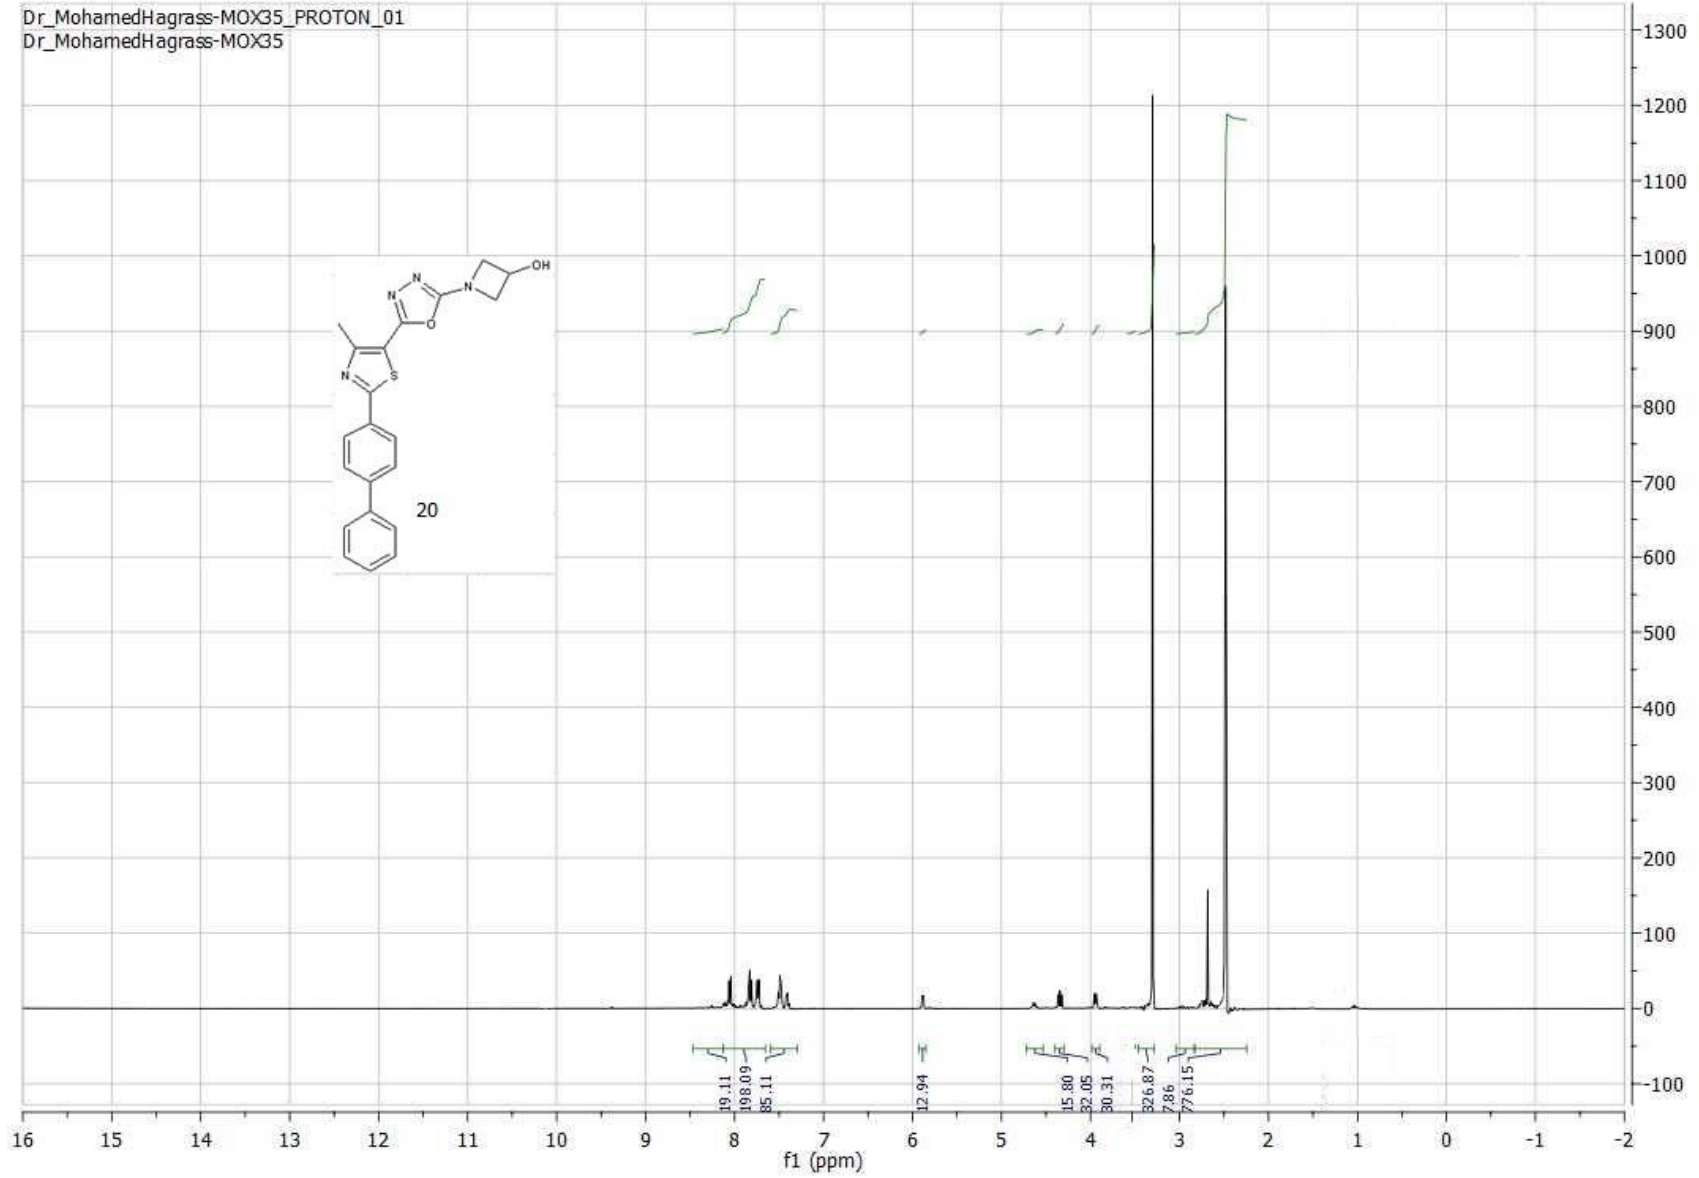



Dr\_MohamedHagress-Mox35\_CARBON\_01  
Dr\_MohamedHagress-Mox35

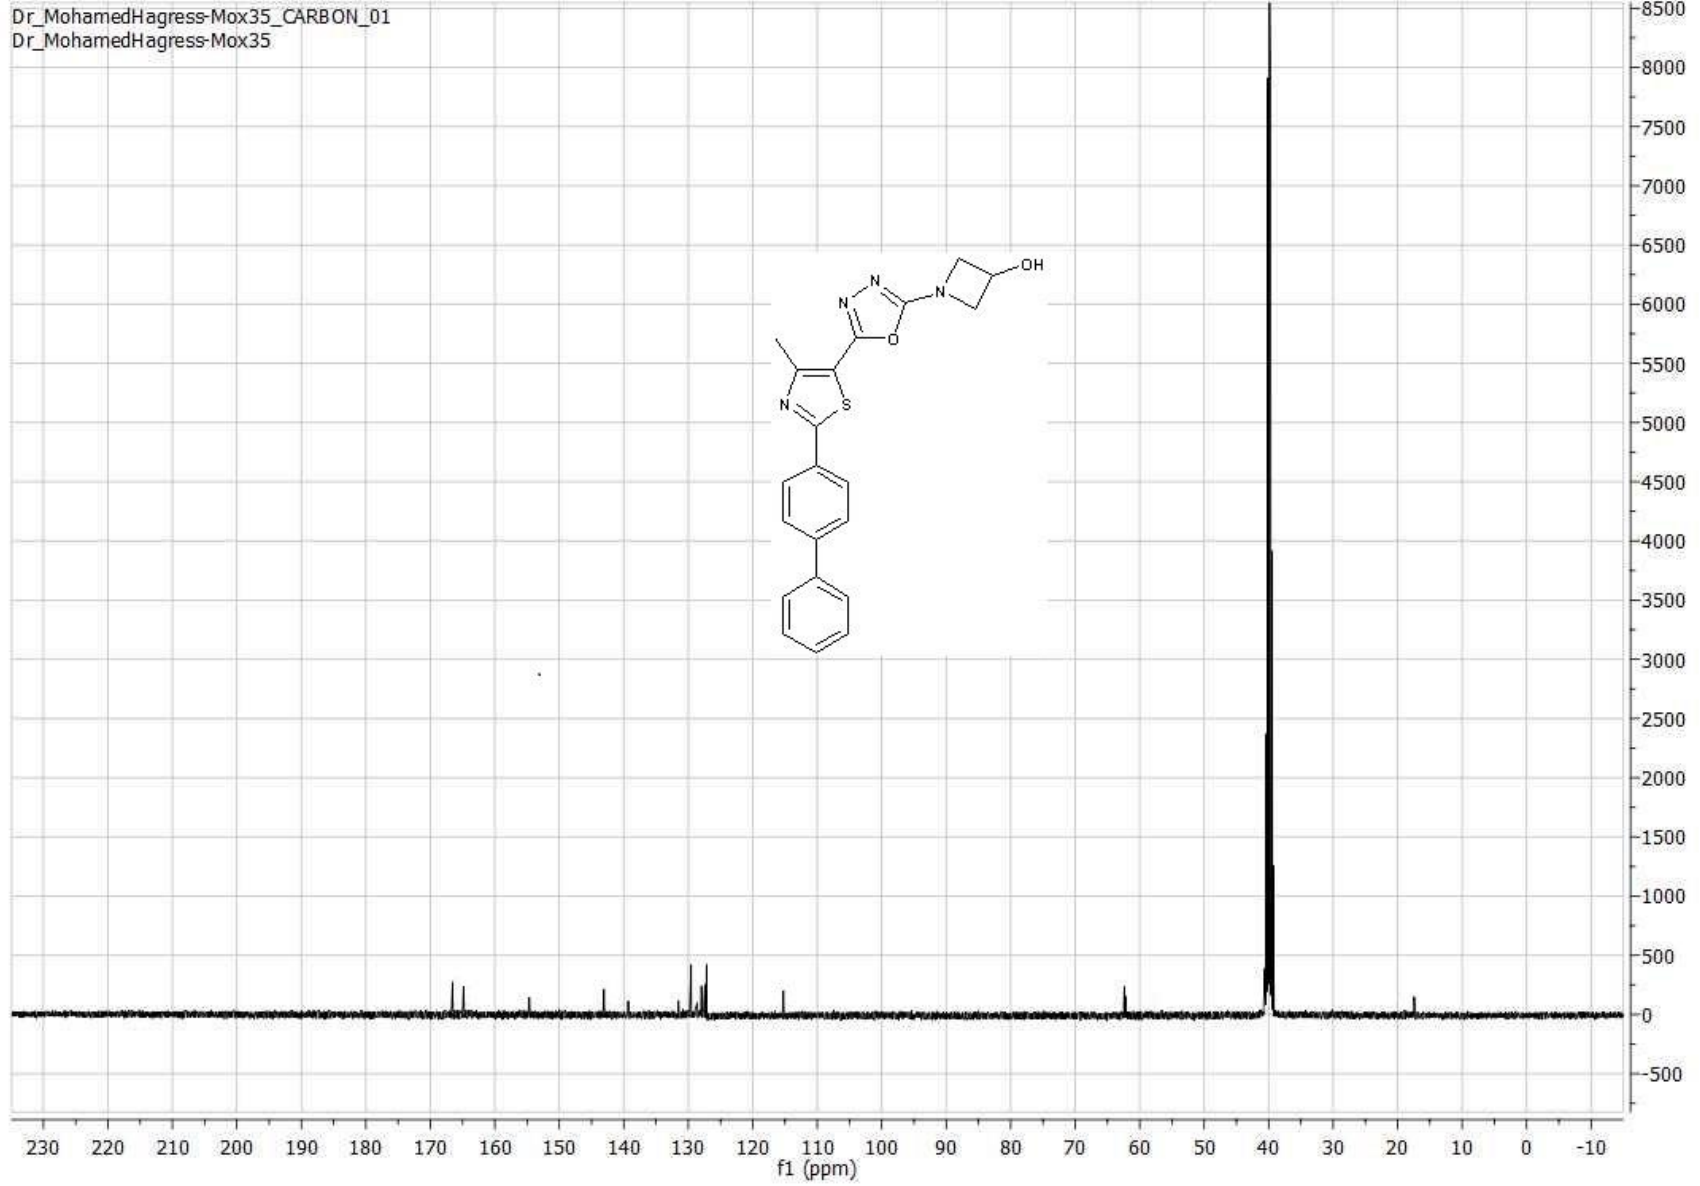

dr\_EmanYahia-MOX5C\_PROTON\_01  
dr\_EmanYahia-MOX5C

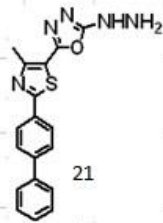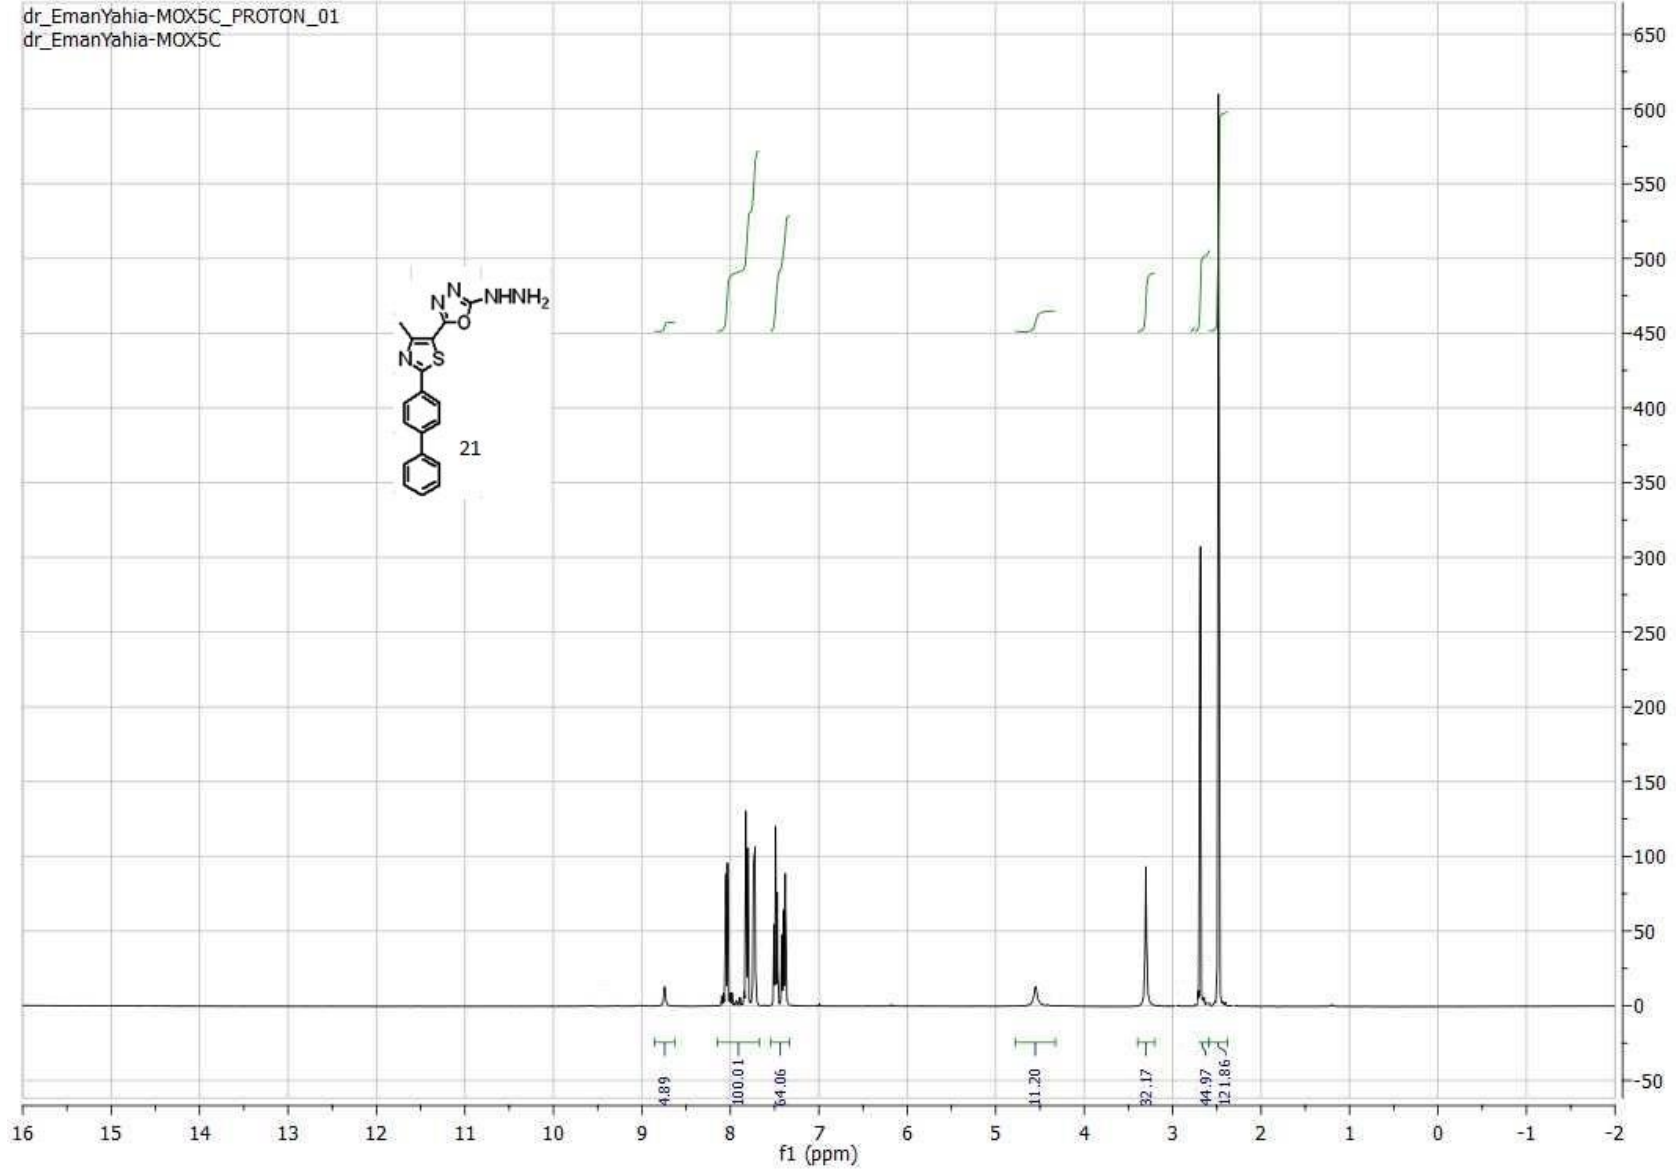

Dr\_EmanYahia-MOX5C\_CARBON\_01  
Dr\_EmanYahia-MOX5C

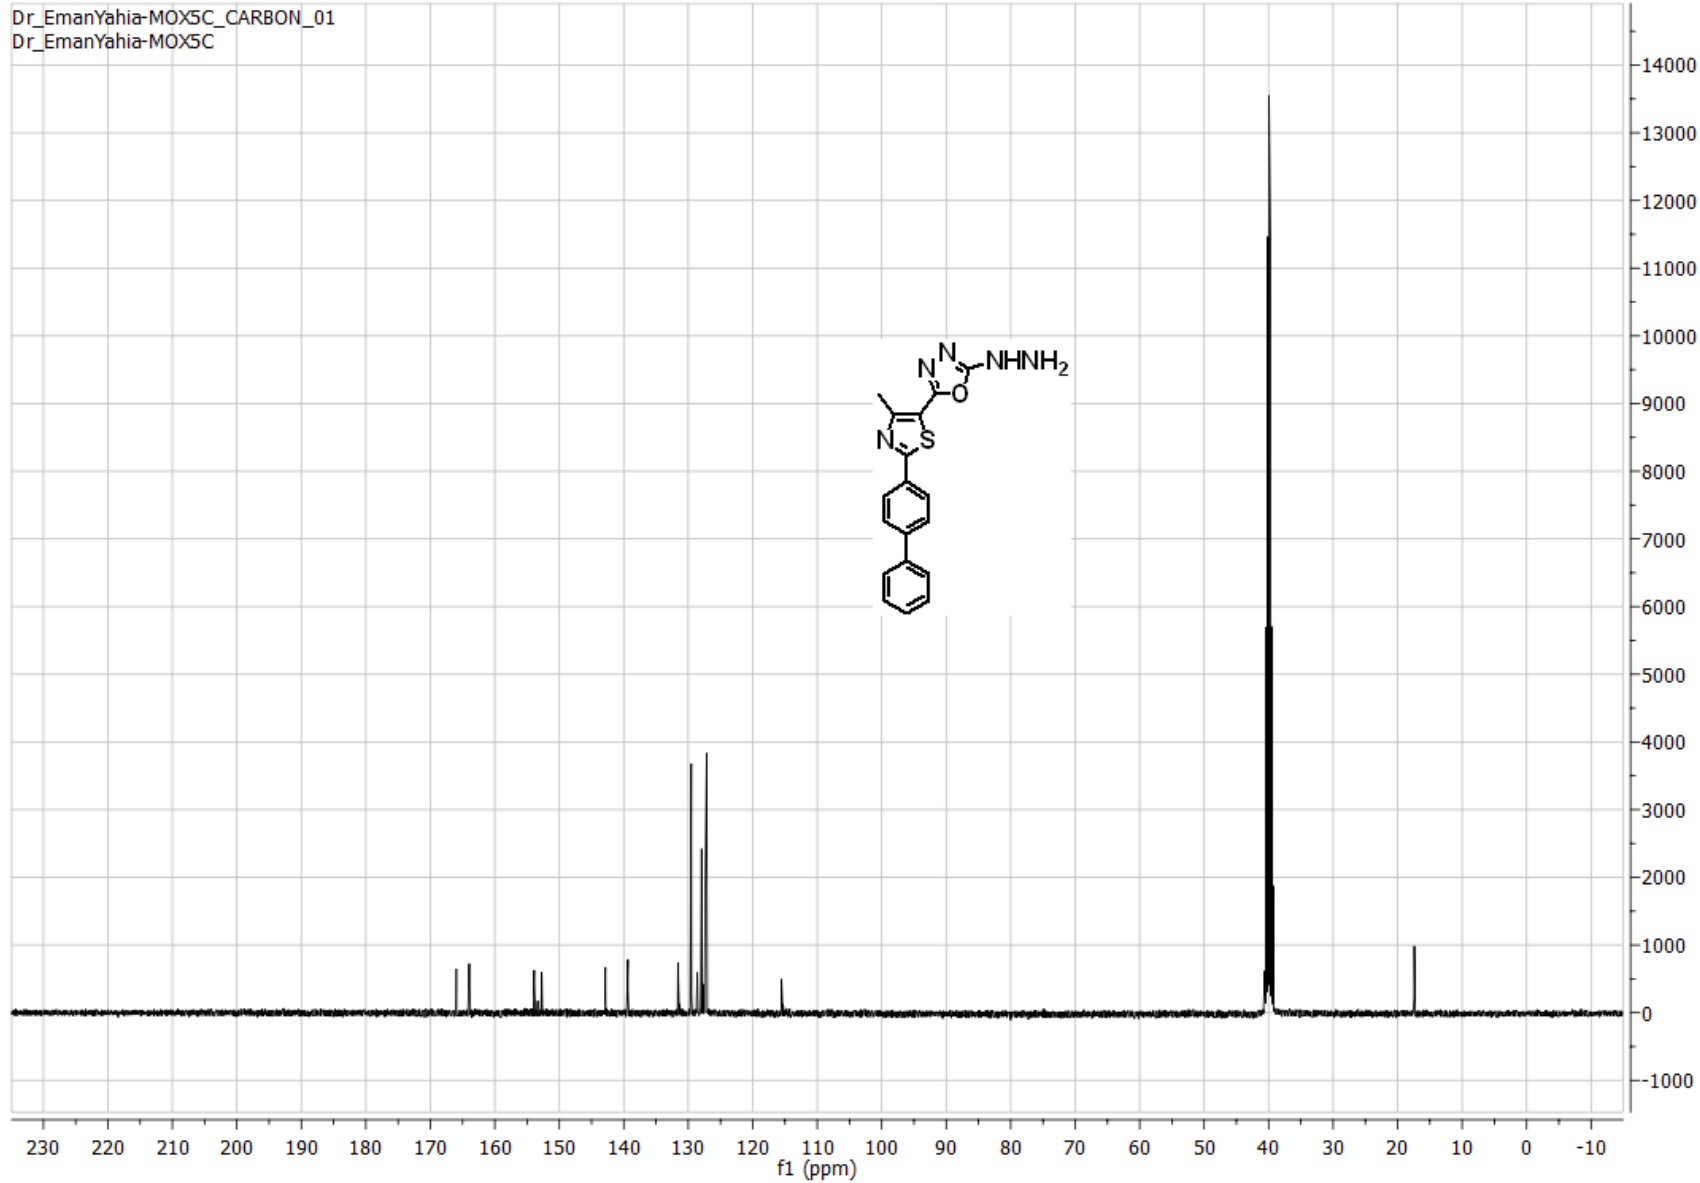

Dr\_EmanYaiha-MOX7\_PROTON\_01  
Dr\_EmanYaiha-MOX7

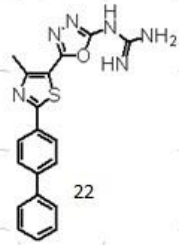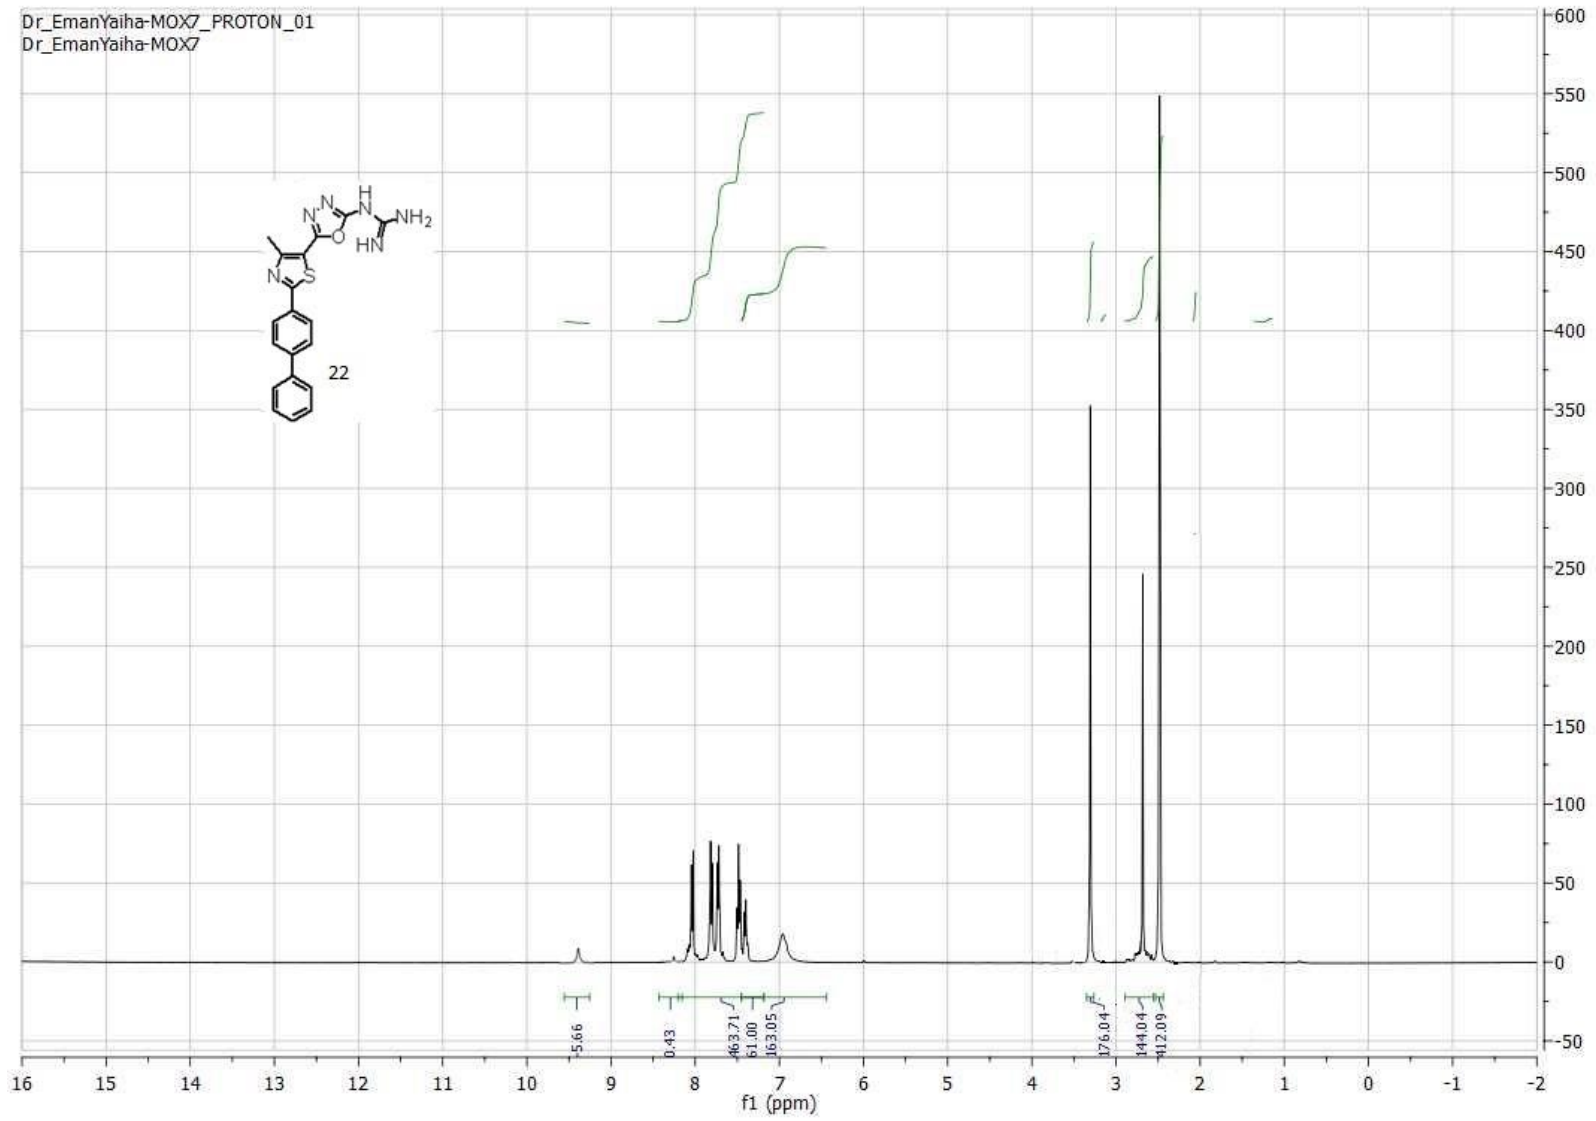

Dr\_EmanYahia-MOX7\_CARBON\_01  
Dr\_EmanYahia-MOX7

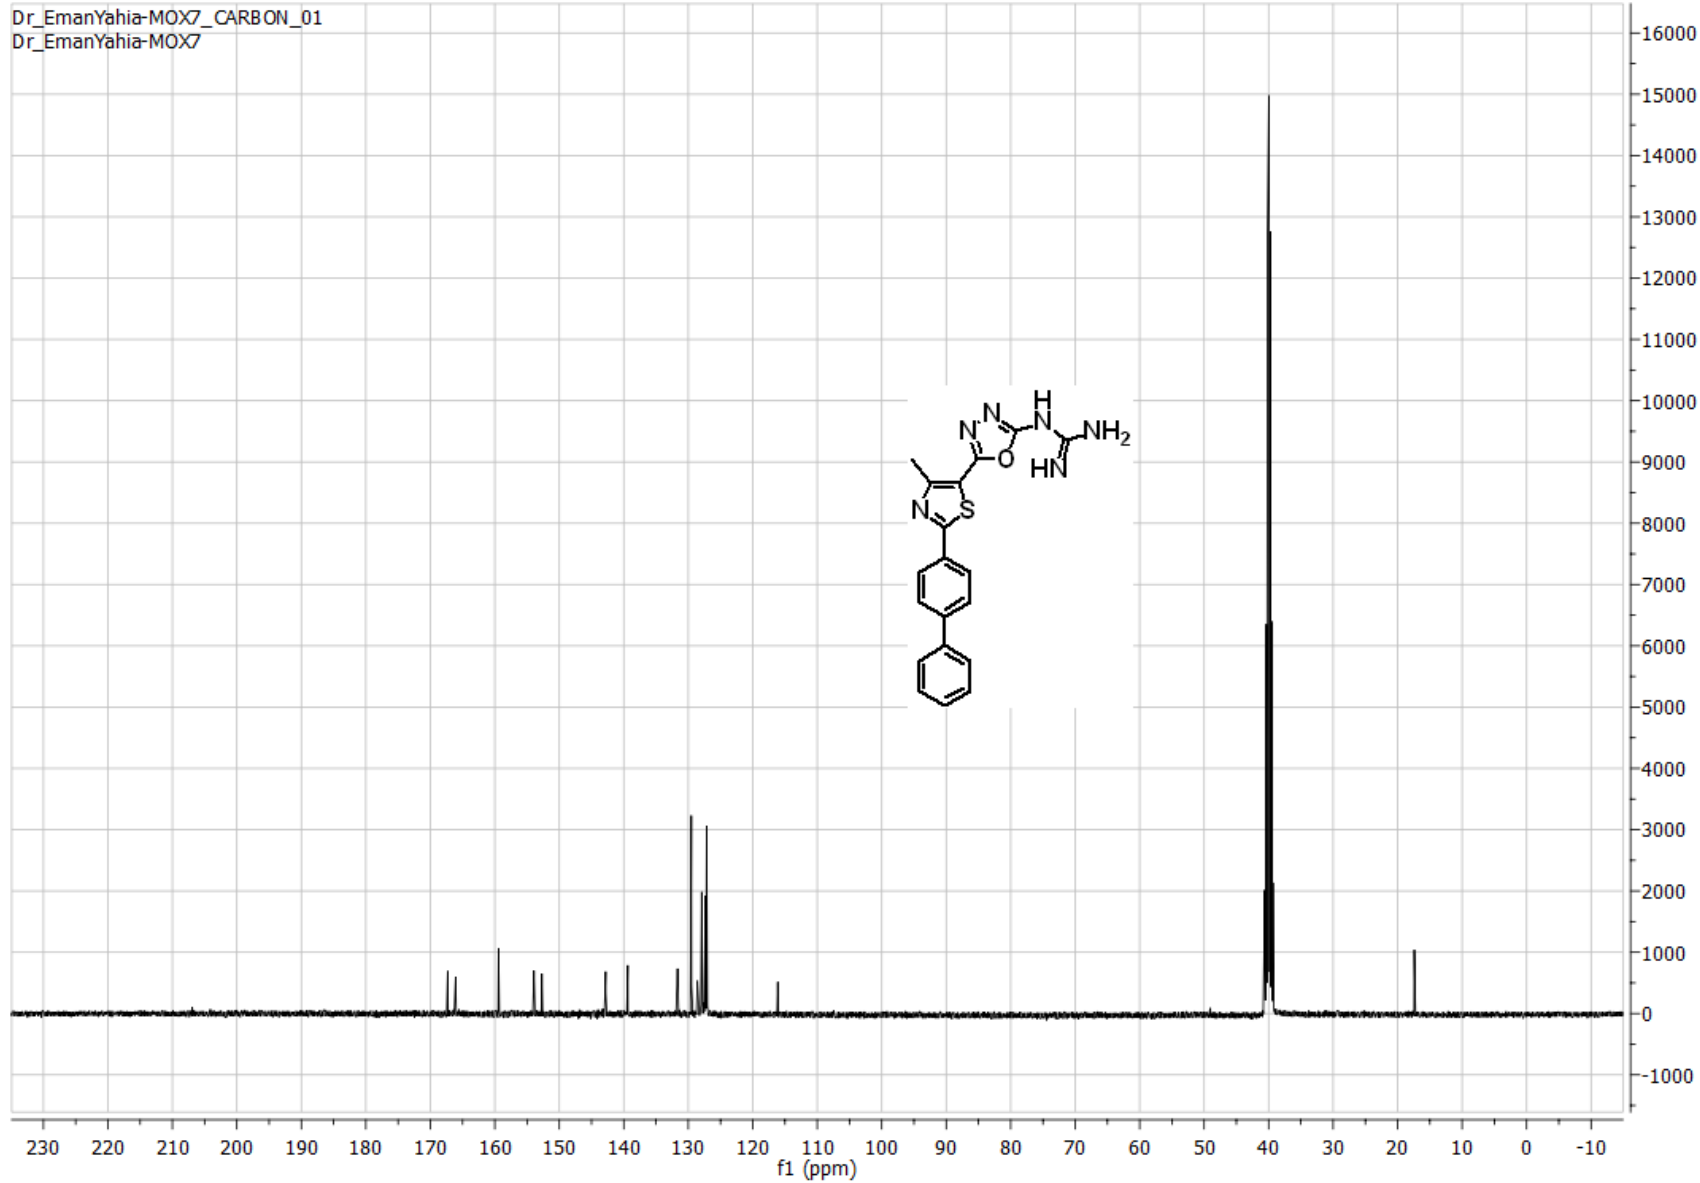



dr\_EmanYahia-MOX6\_CARBON\_01  
dr\_EmanYahia-MOX6

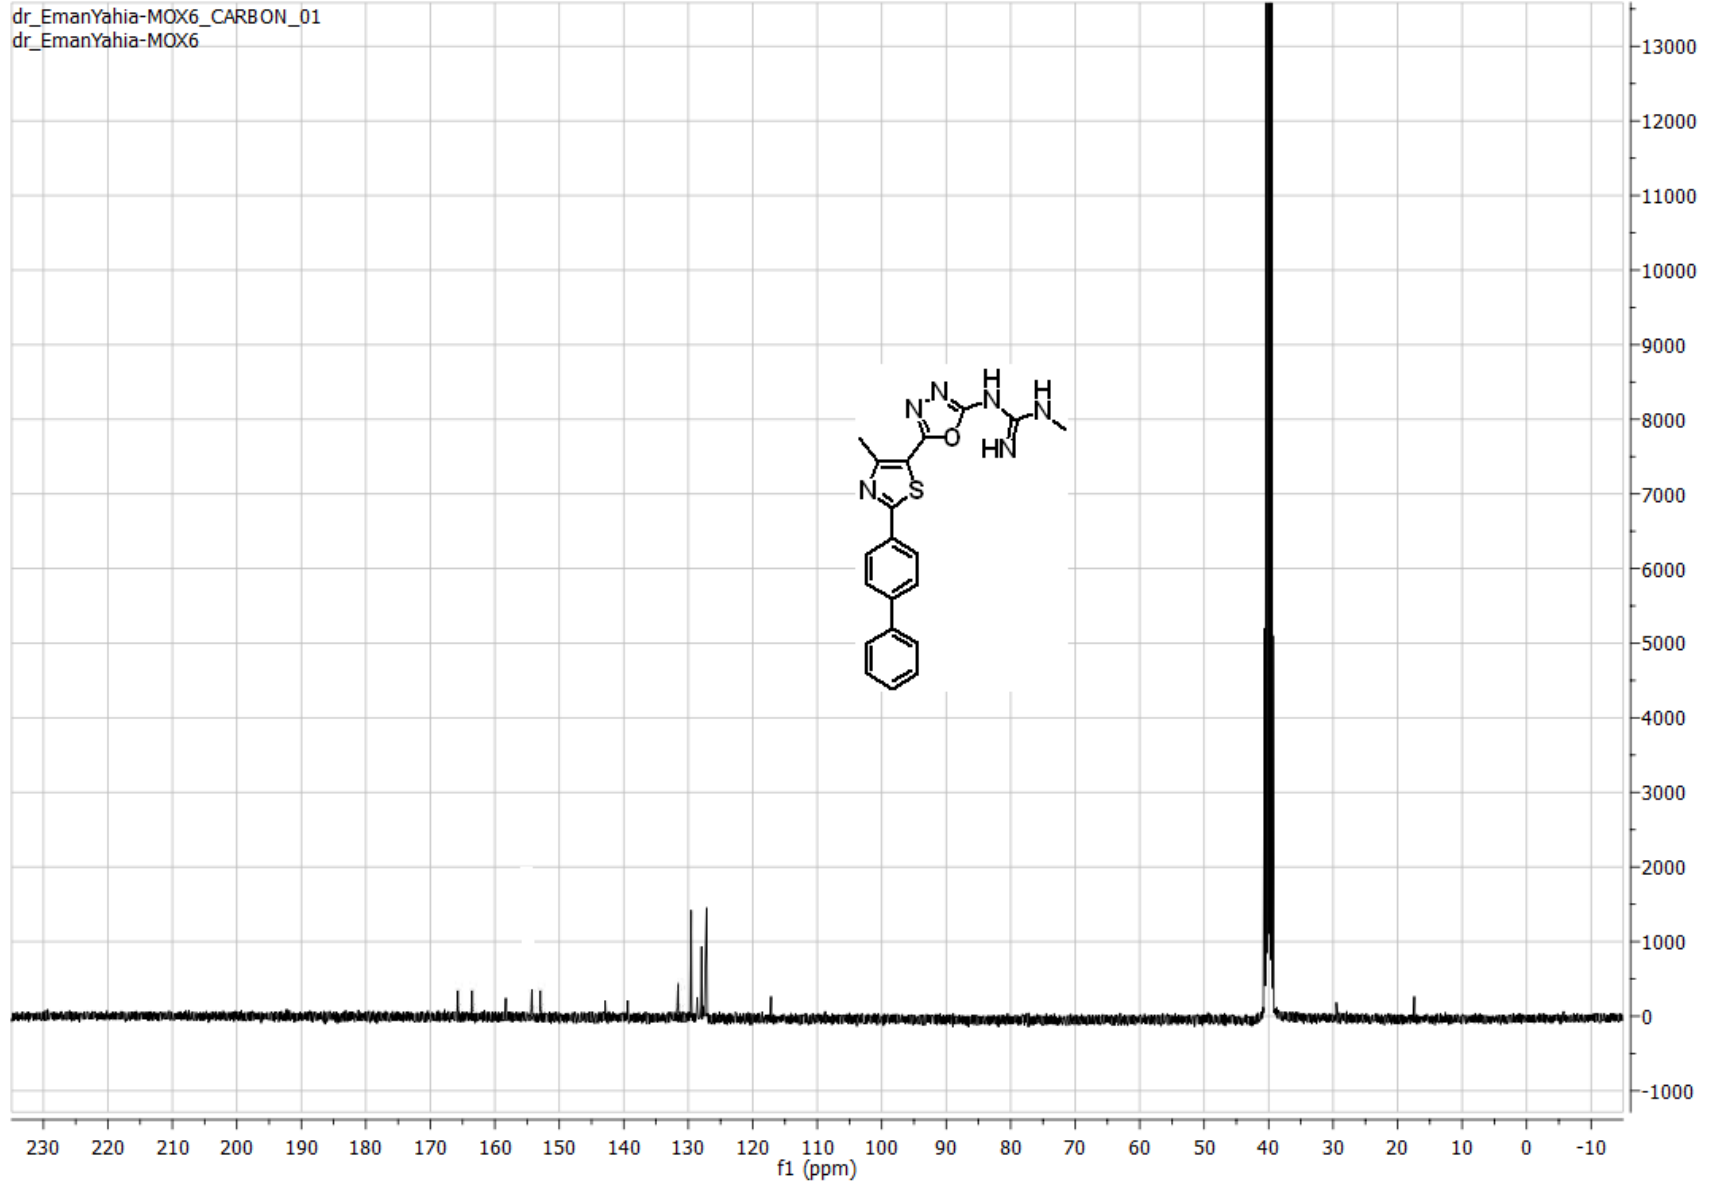

Dr\_EmanYaiha-MOX13\_PROTON\_01  
Dr\_EmanYaiha-MOX13

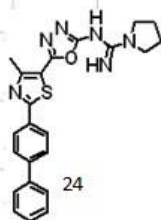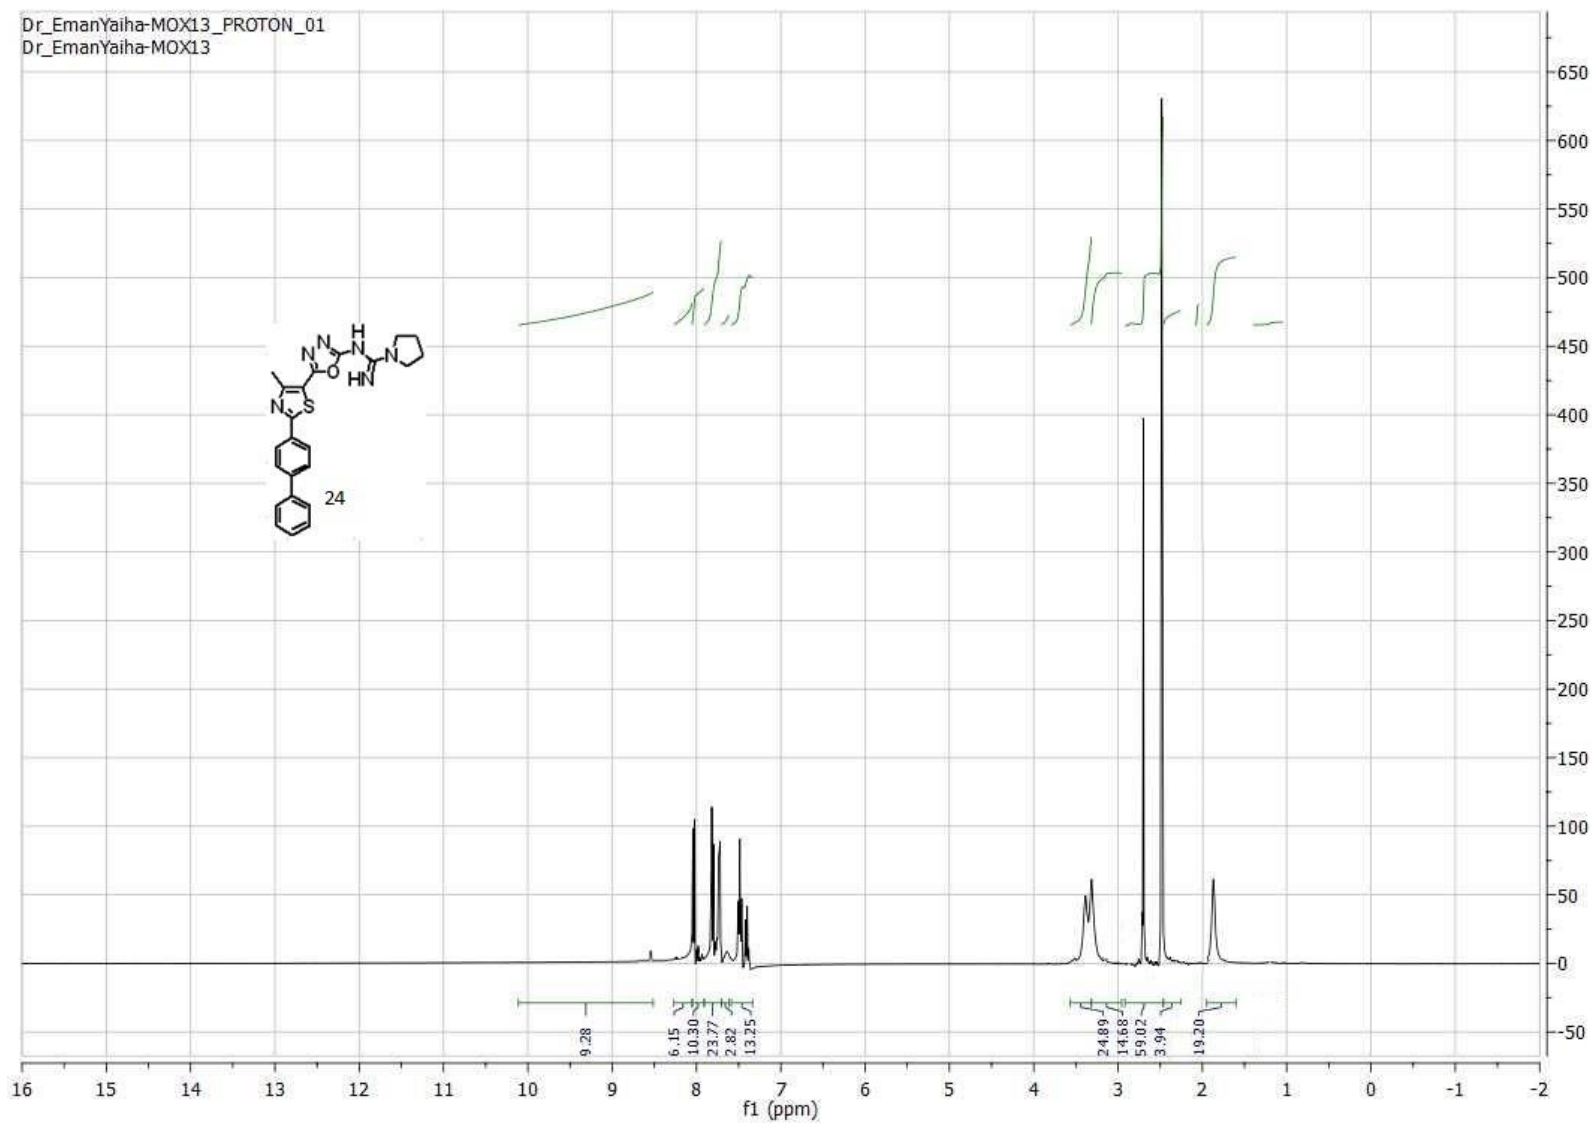



Dr\_EmanYahia-MOX13\_CARBON\_01  
Dr\_EmanYahia-MOX13

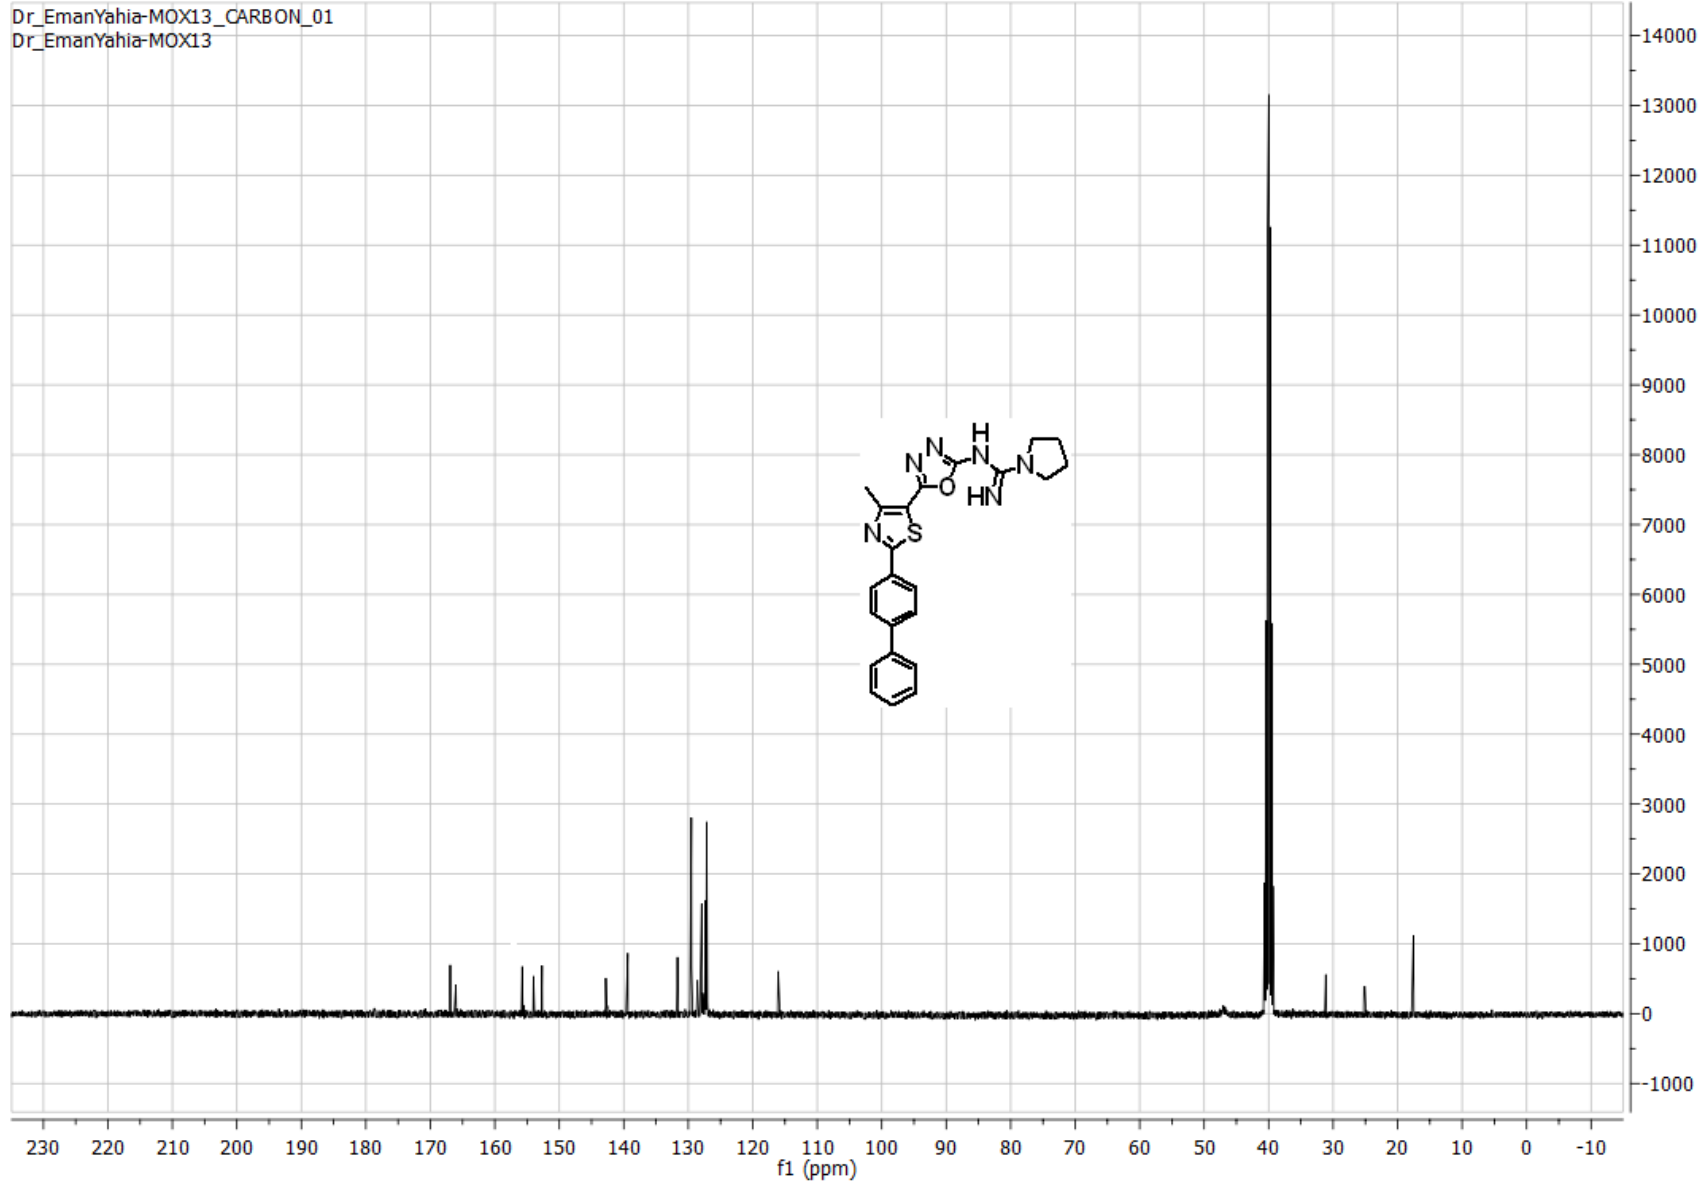

Dr\_MohamedHagrass-MOX33\_PROTON\_01  
Dr\_MohamedHagrass-MOX33

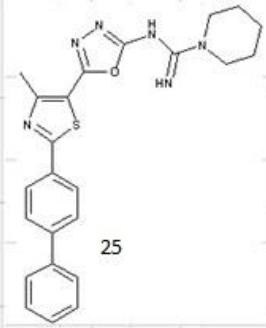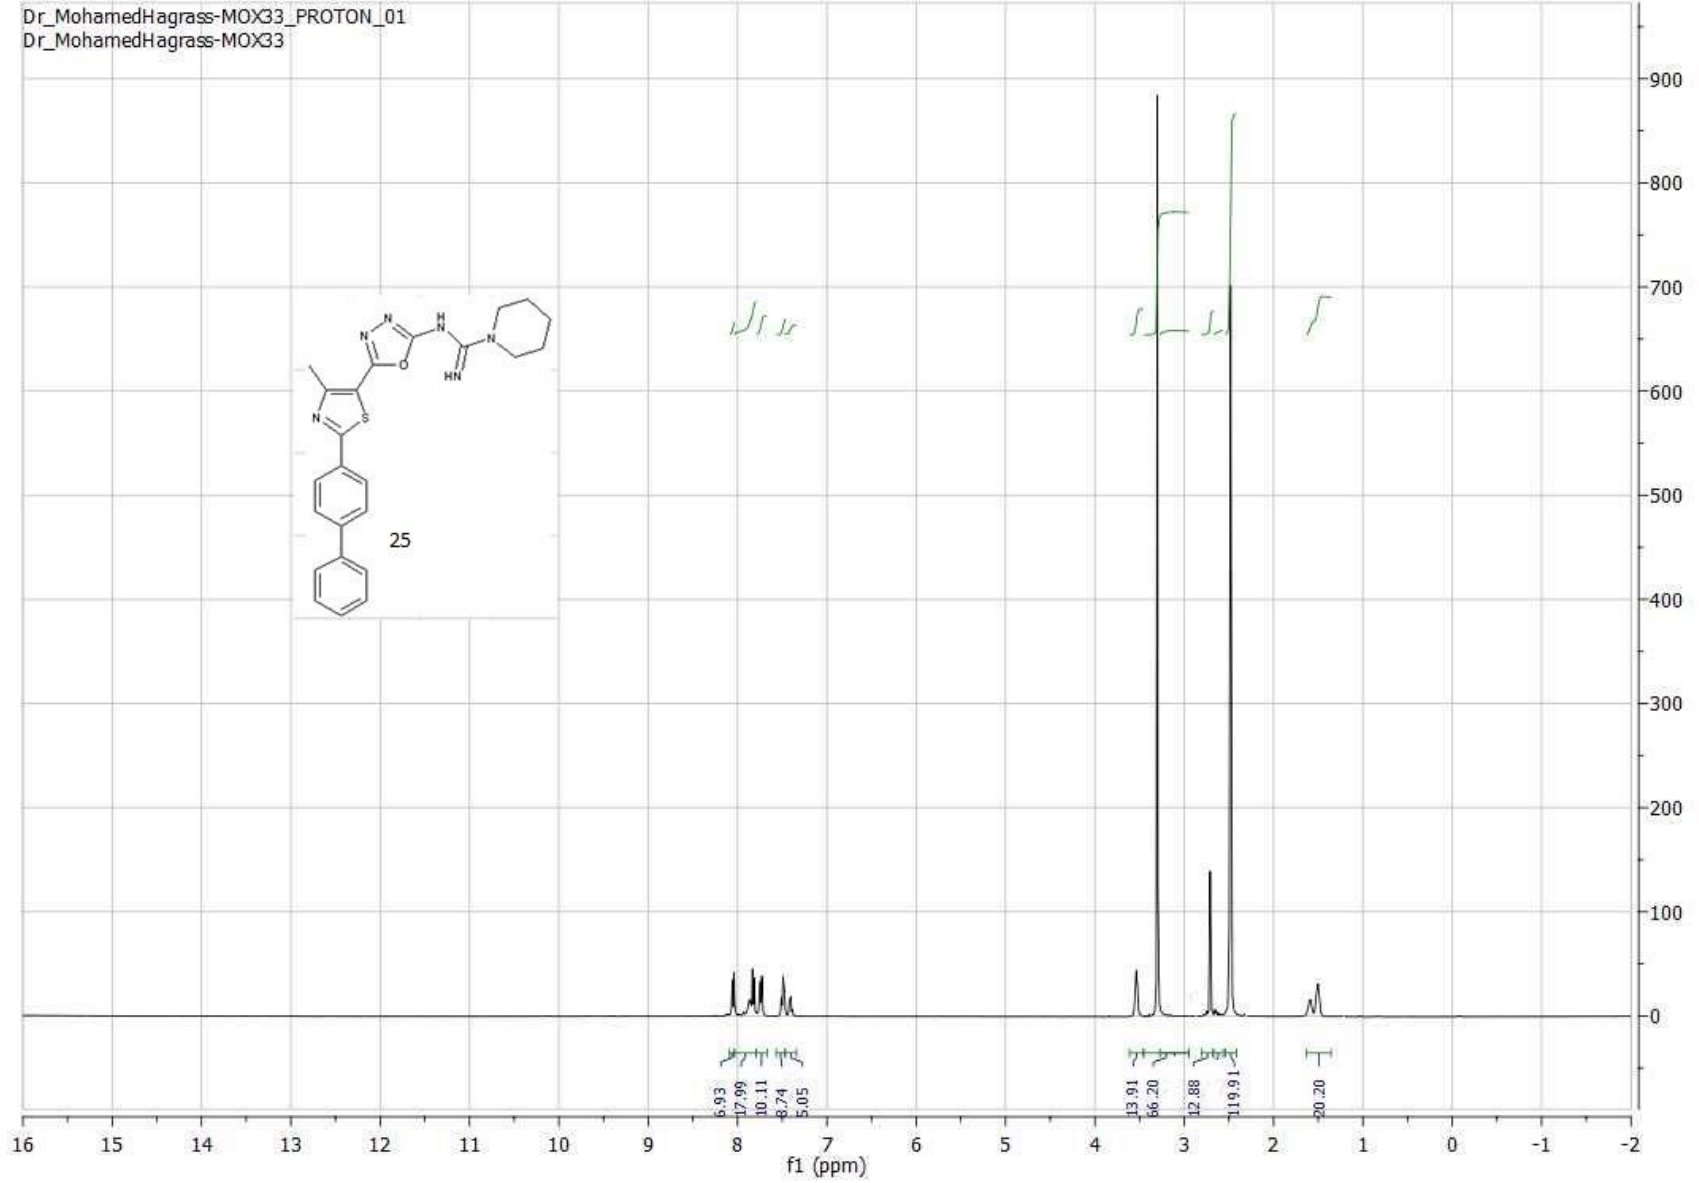

Dr\_MohamedHagress-Mox33\_CARBON\_01  
Dr\_MohamedHagress-Mox33

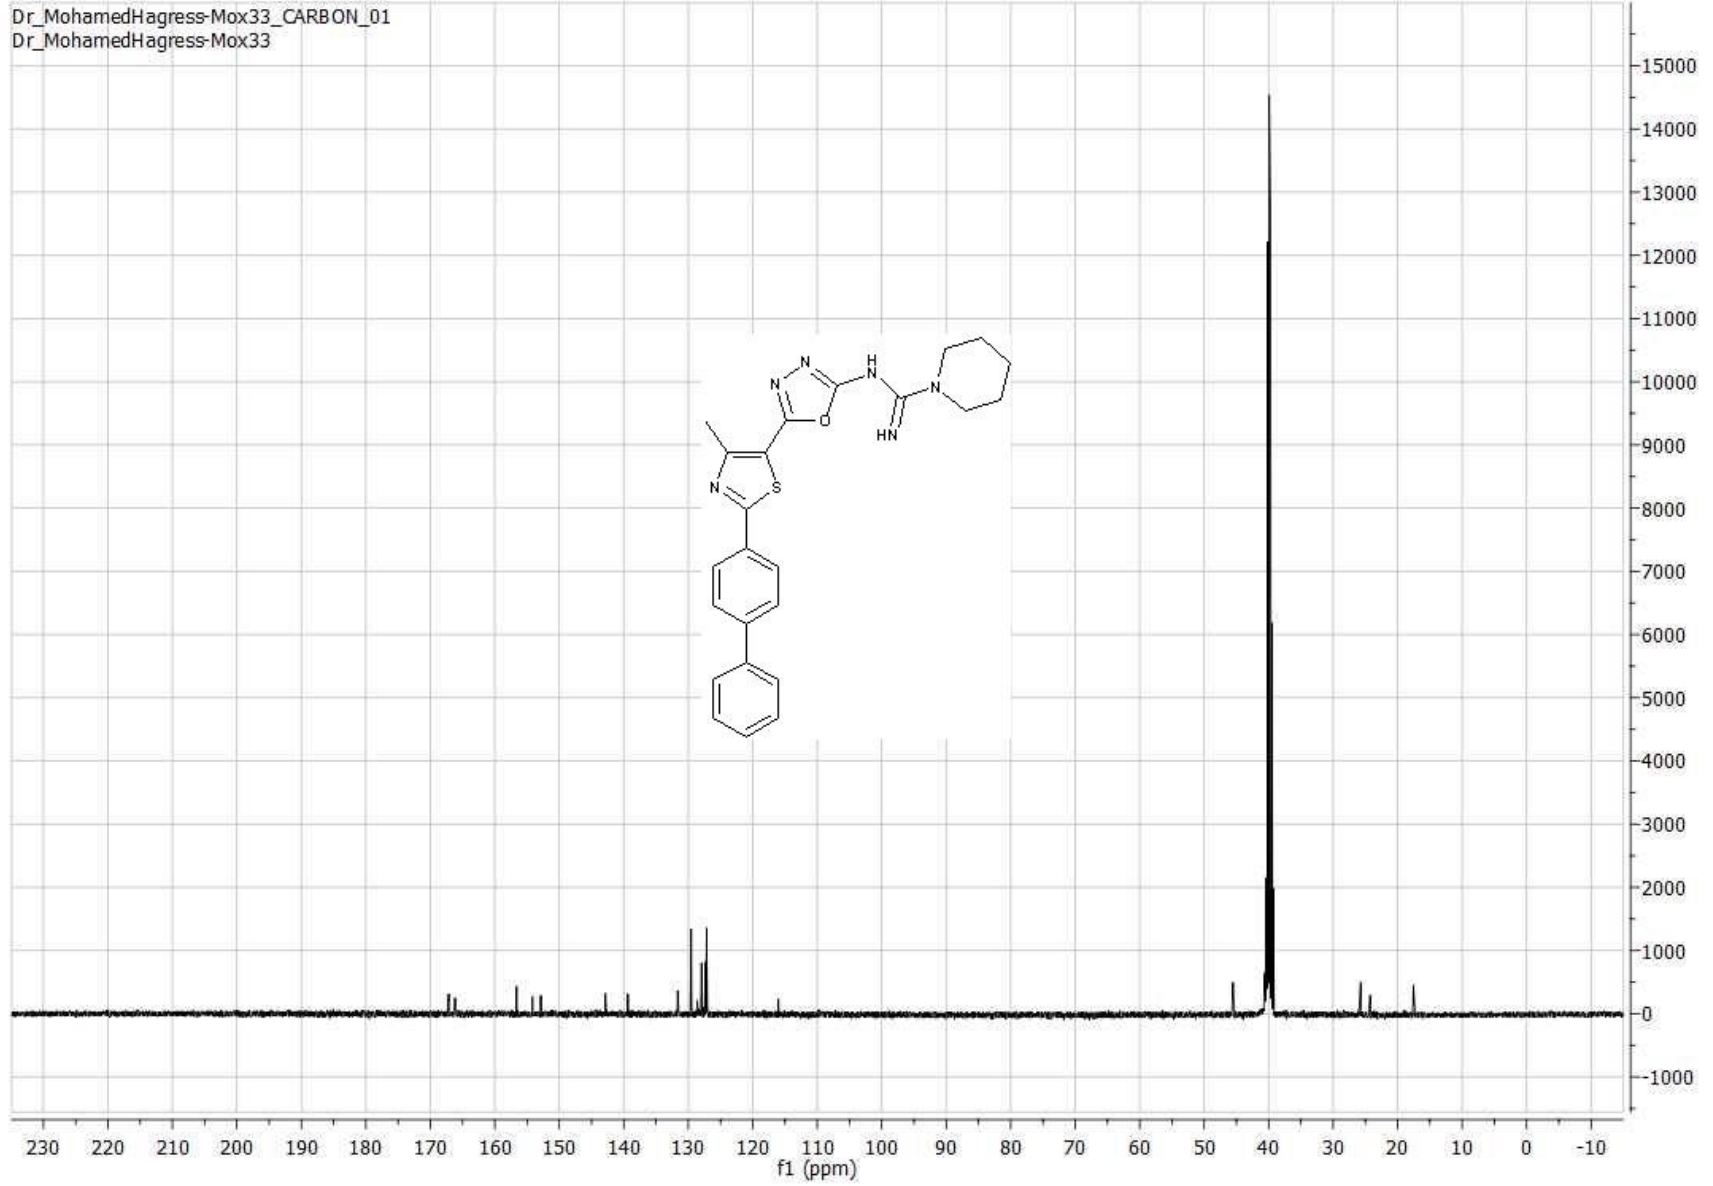



Dr\_MohamedHagress-Mox32\_CARBON\_01  
Dr\_MohamedHagress-Mox32

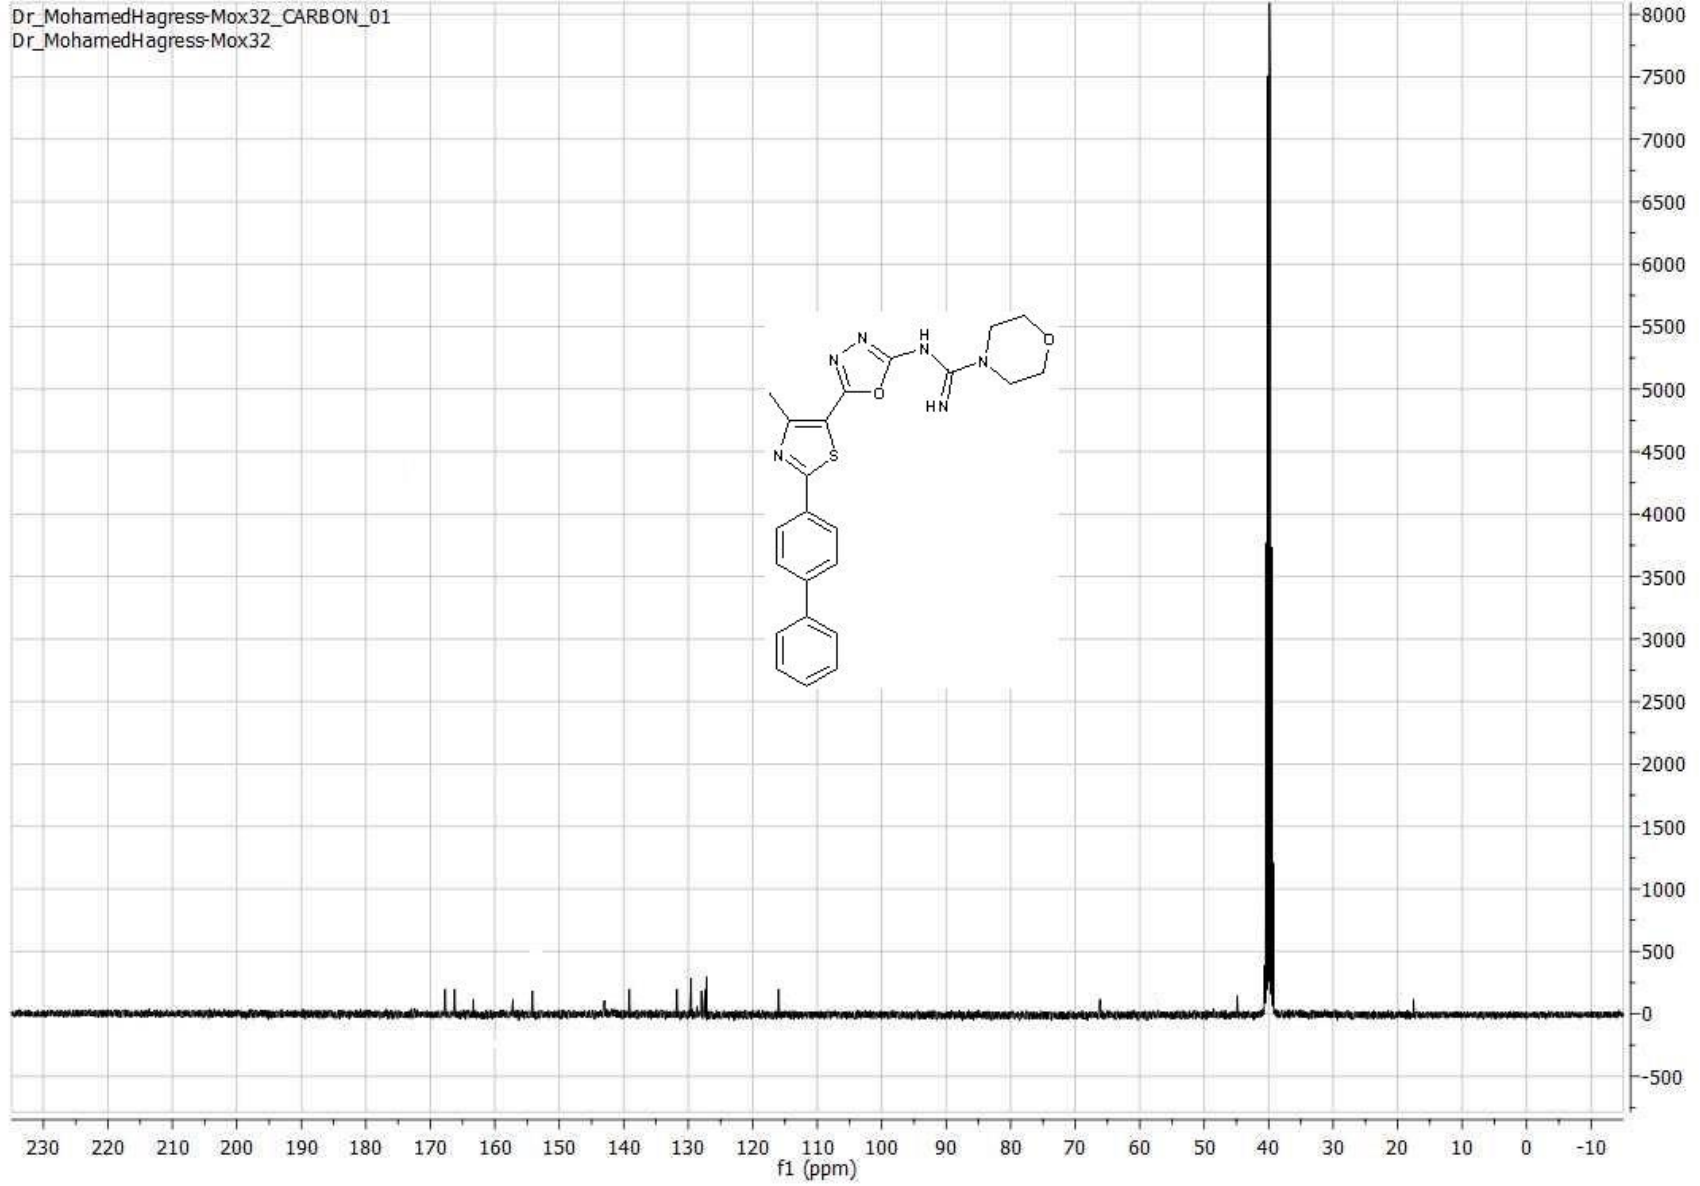

Dr\_MohamedHagrass-MOX34\_PROTON\_01  
Dr\_MohamedHagrass-MOX34

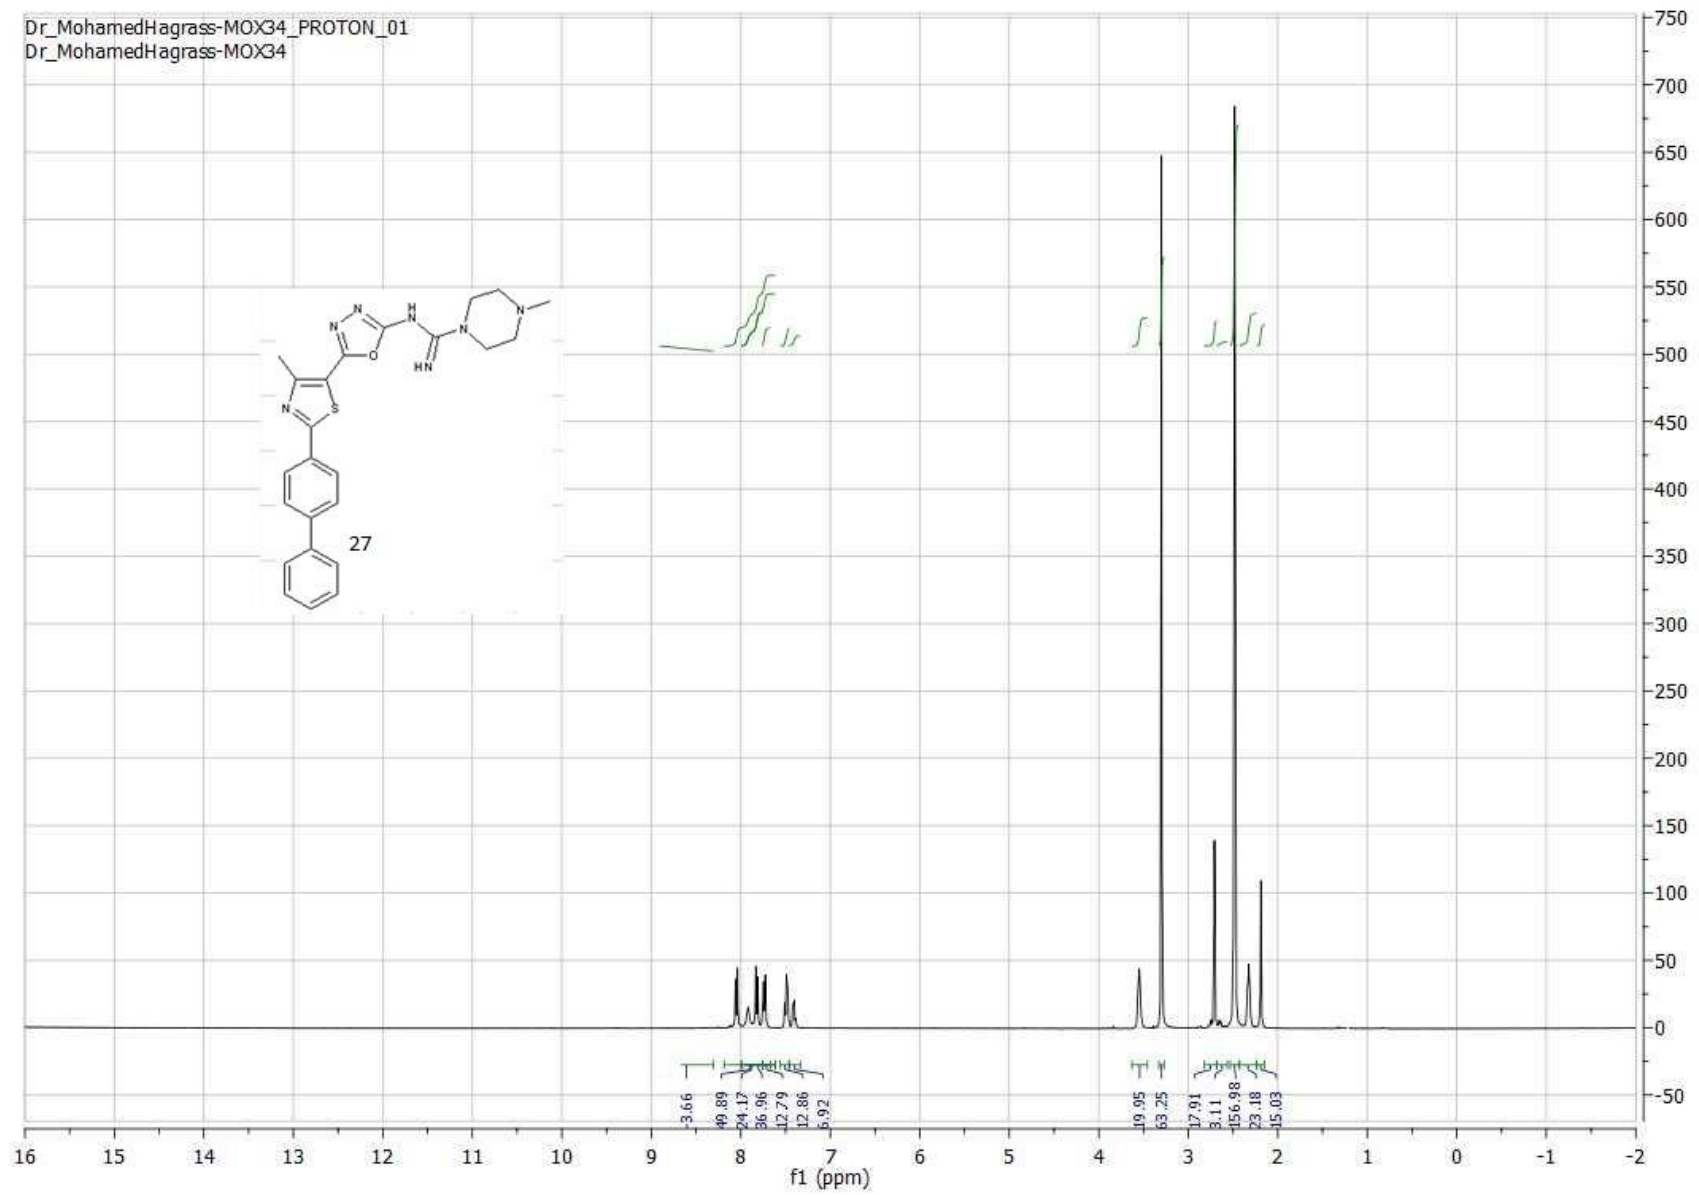

Dr\_MohamedHagress-MOX34\_CARBON\_01  
Dr\_MohamedHagress-MOX34

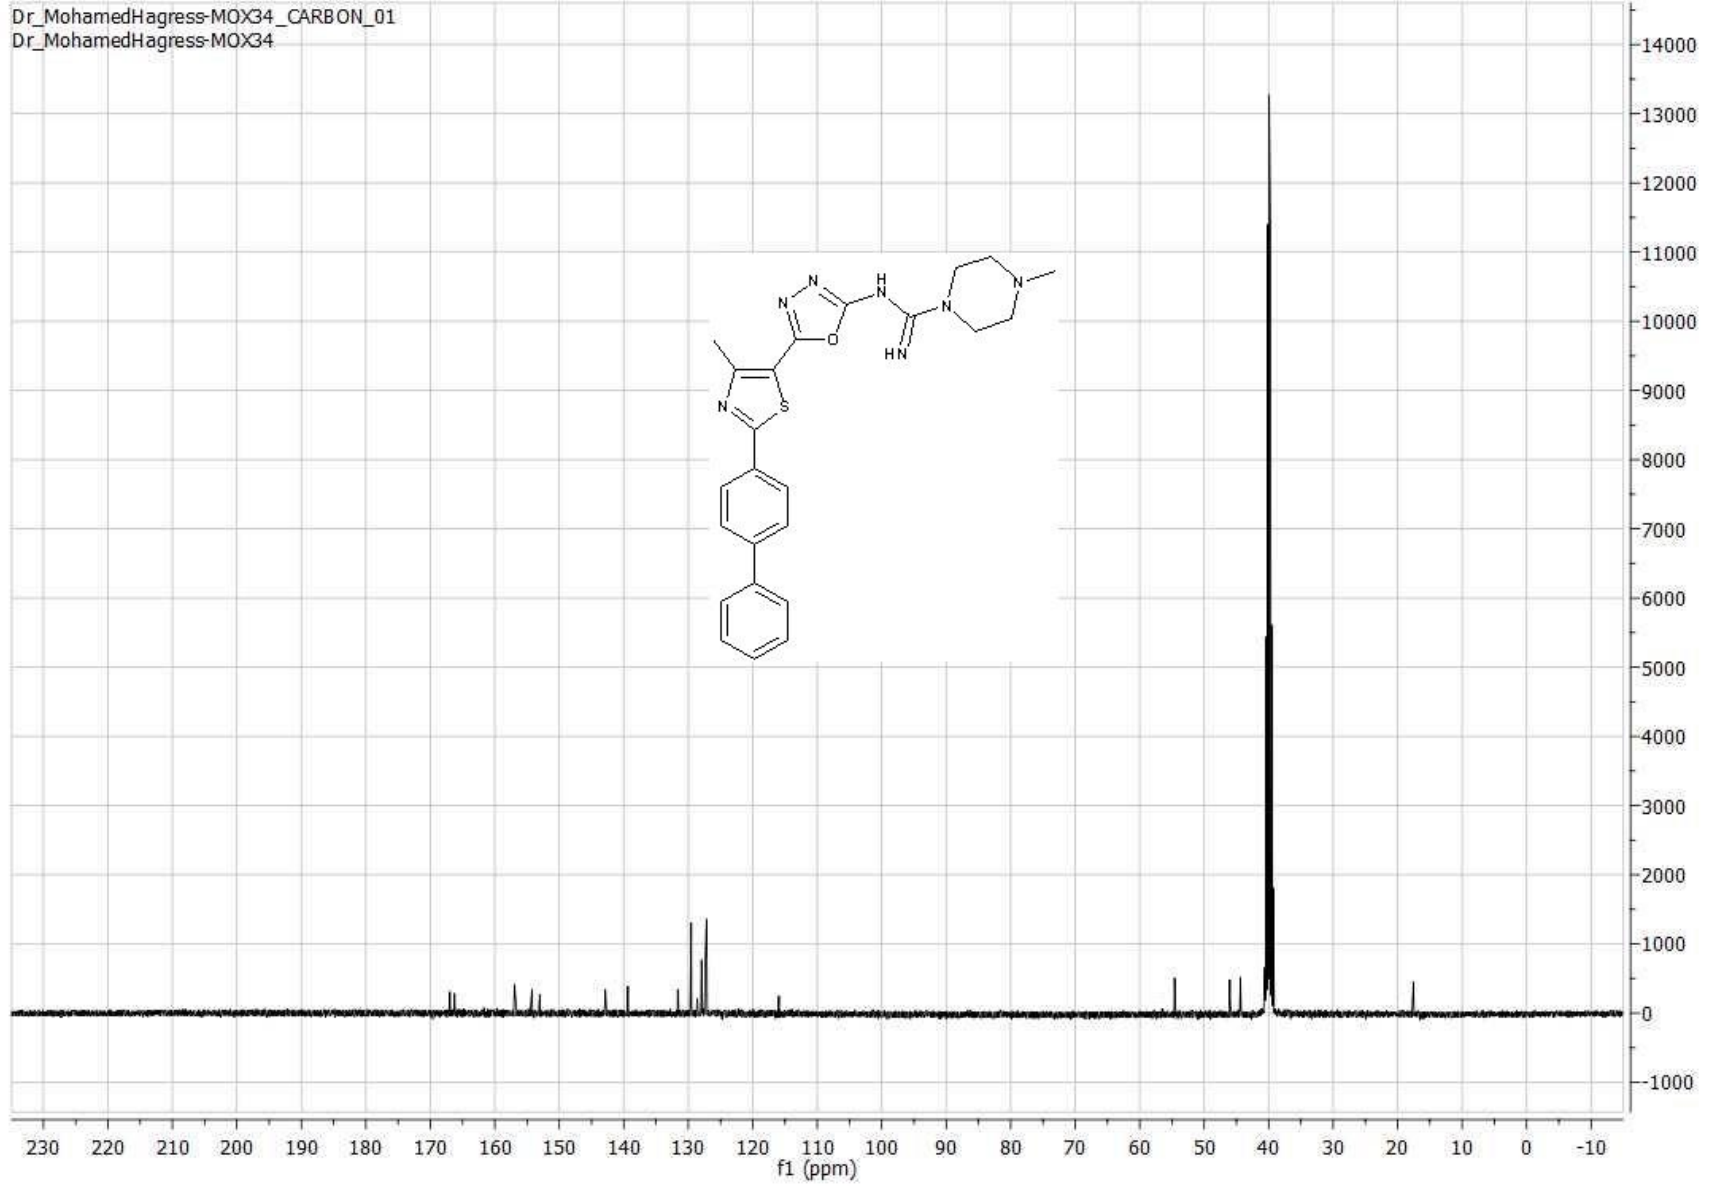

Dr\_EmanYahia-SH14\_PROTON\_01  
Dr\_EmanYahia-SH14

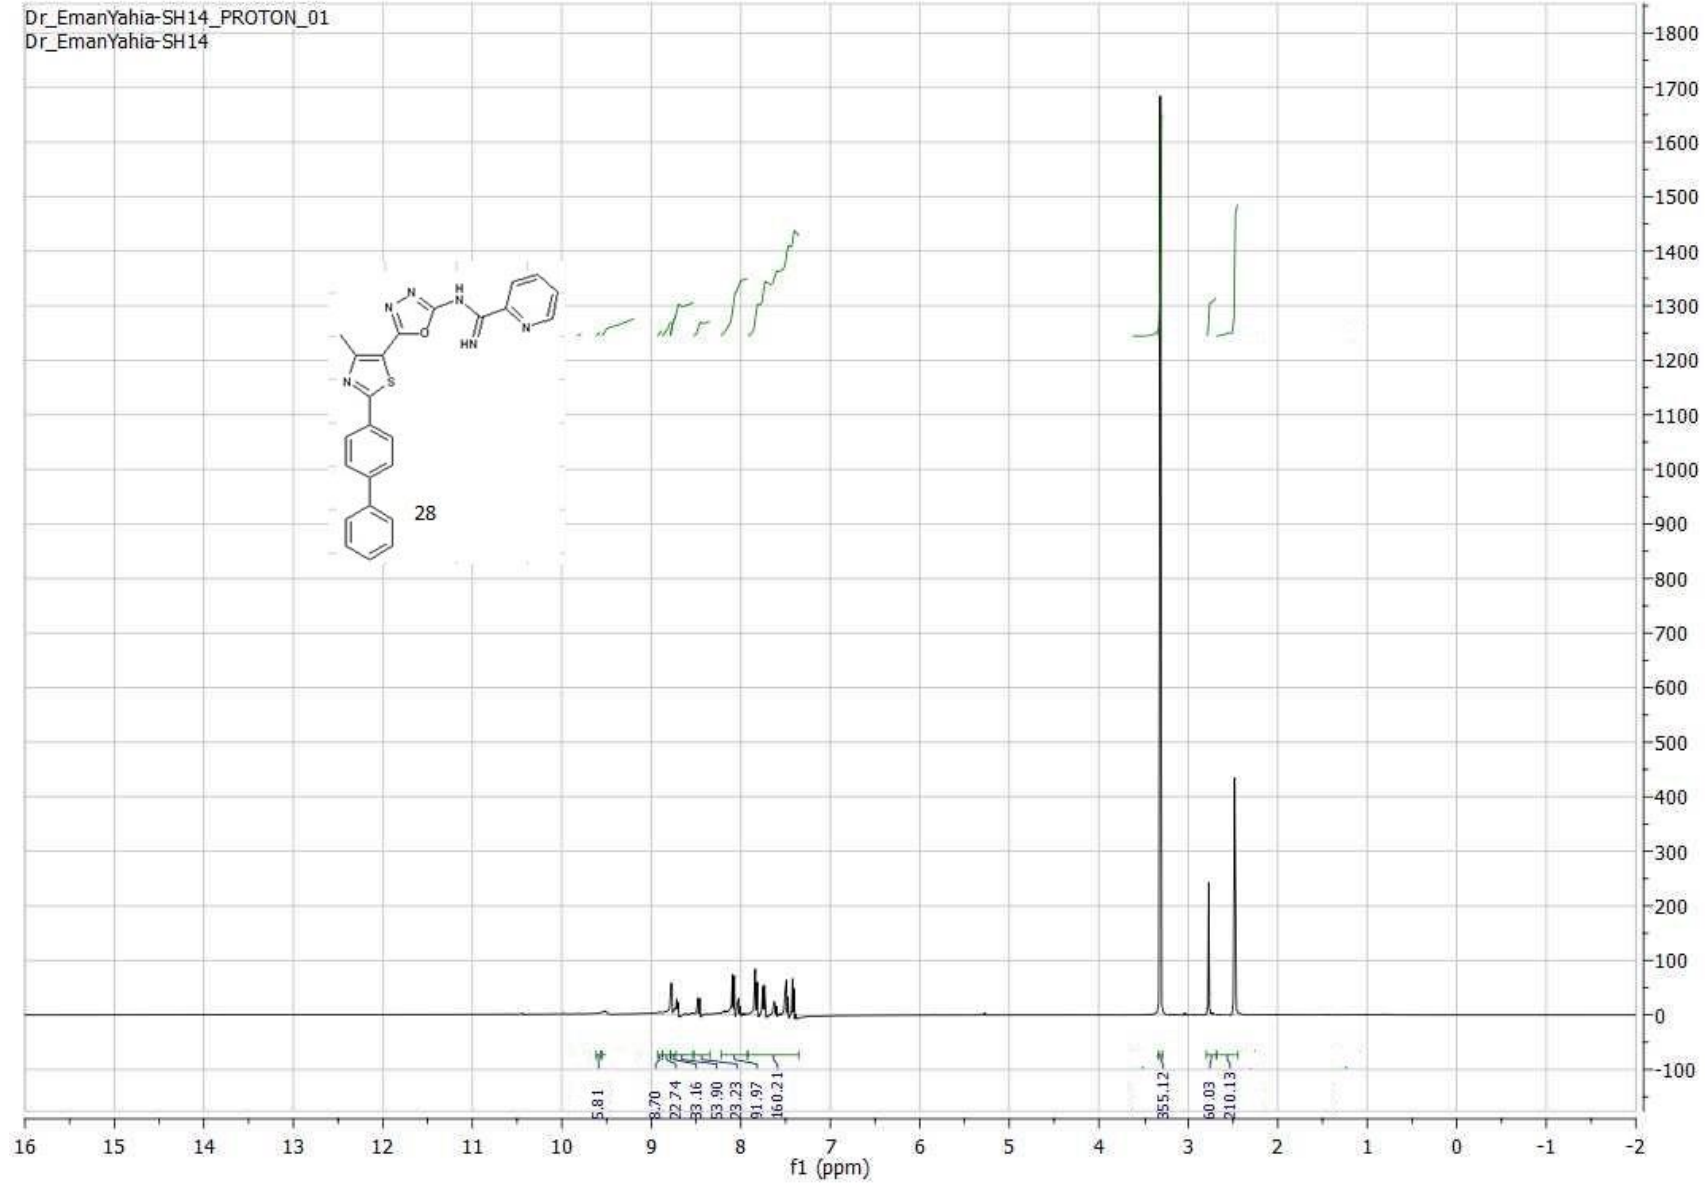



Dr\_EmanYahia-SH22\_CARBON\_01  
Dr\_EmanYahia-SH22

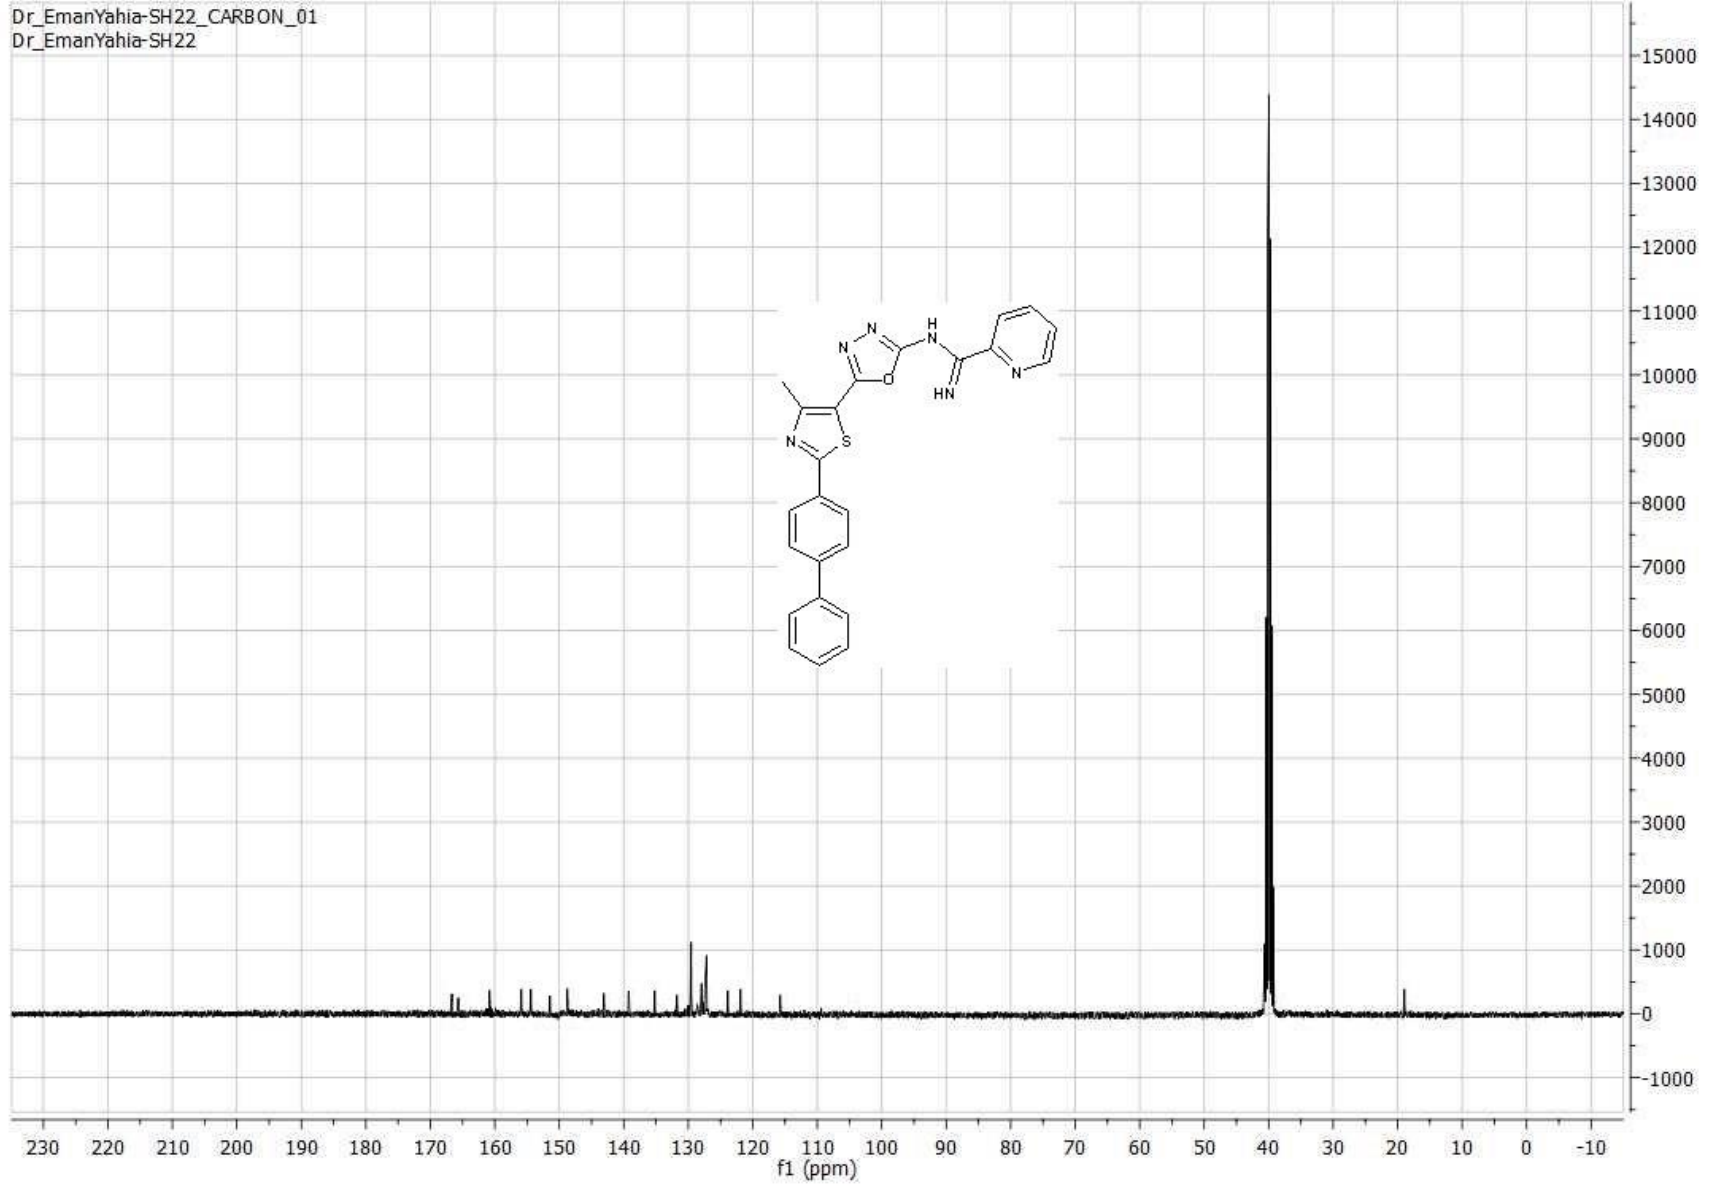

Dr\_MohamedHagrass-MOX30\_PROTON\_01  
Dr\_MohamedHagrass-MOX30

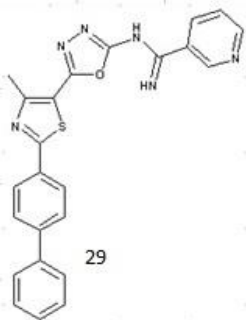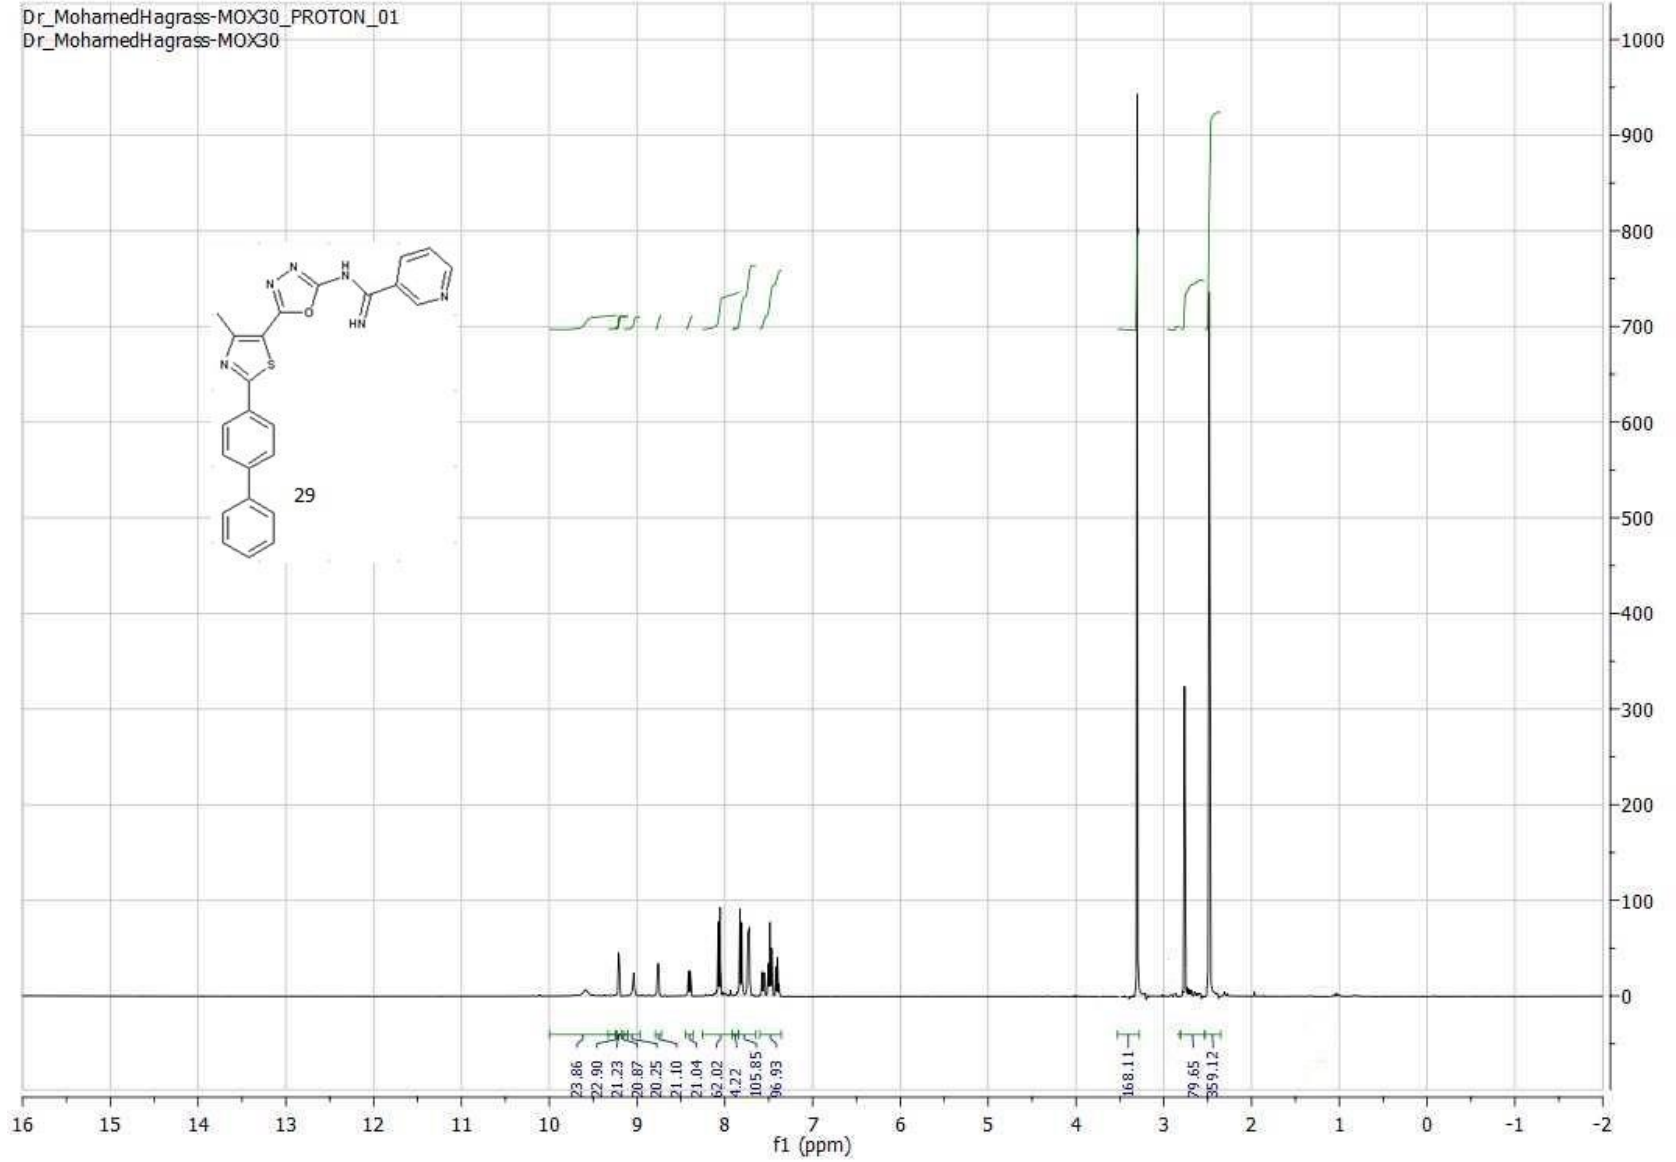

Dr\_MohamedHagress-Mox30\_CARBON\_01  
Dr\_MohamedHagress-Mox30

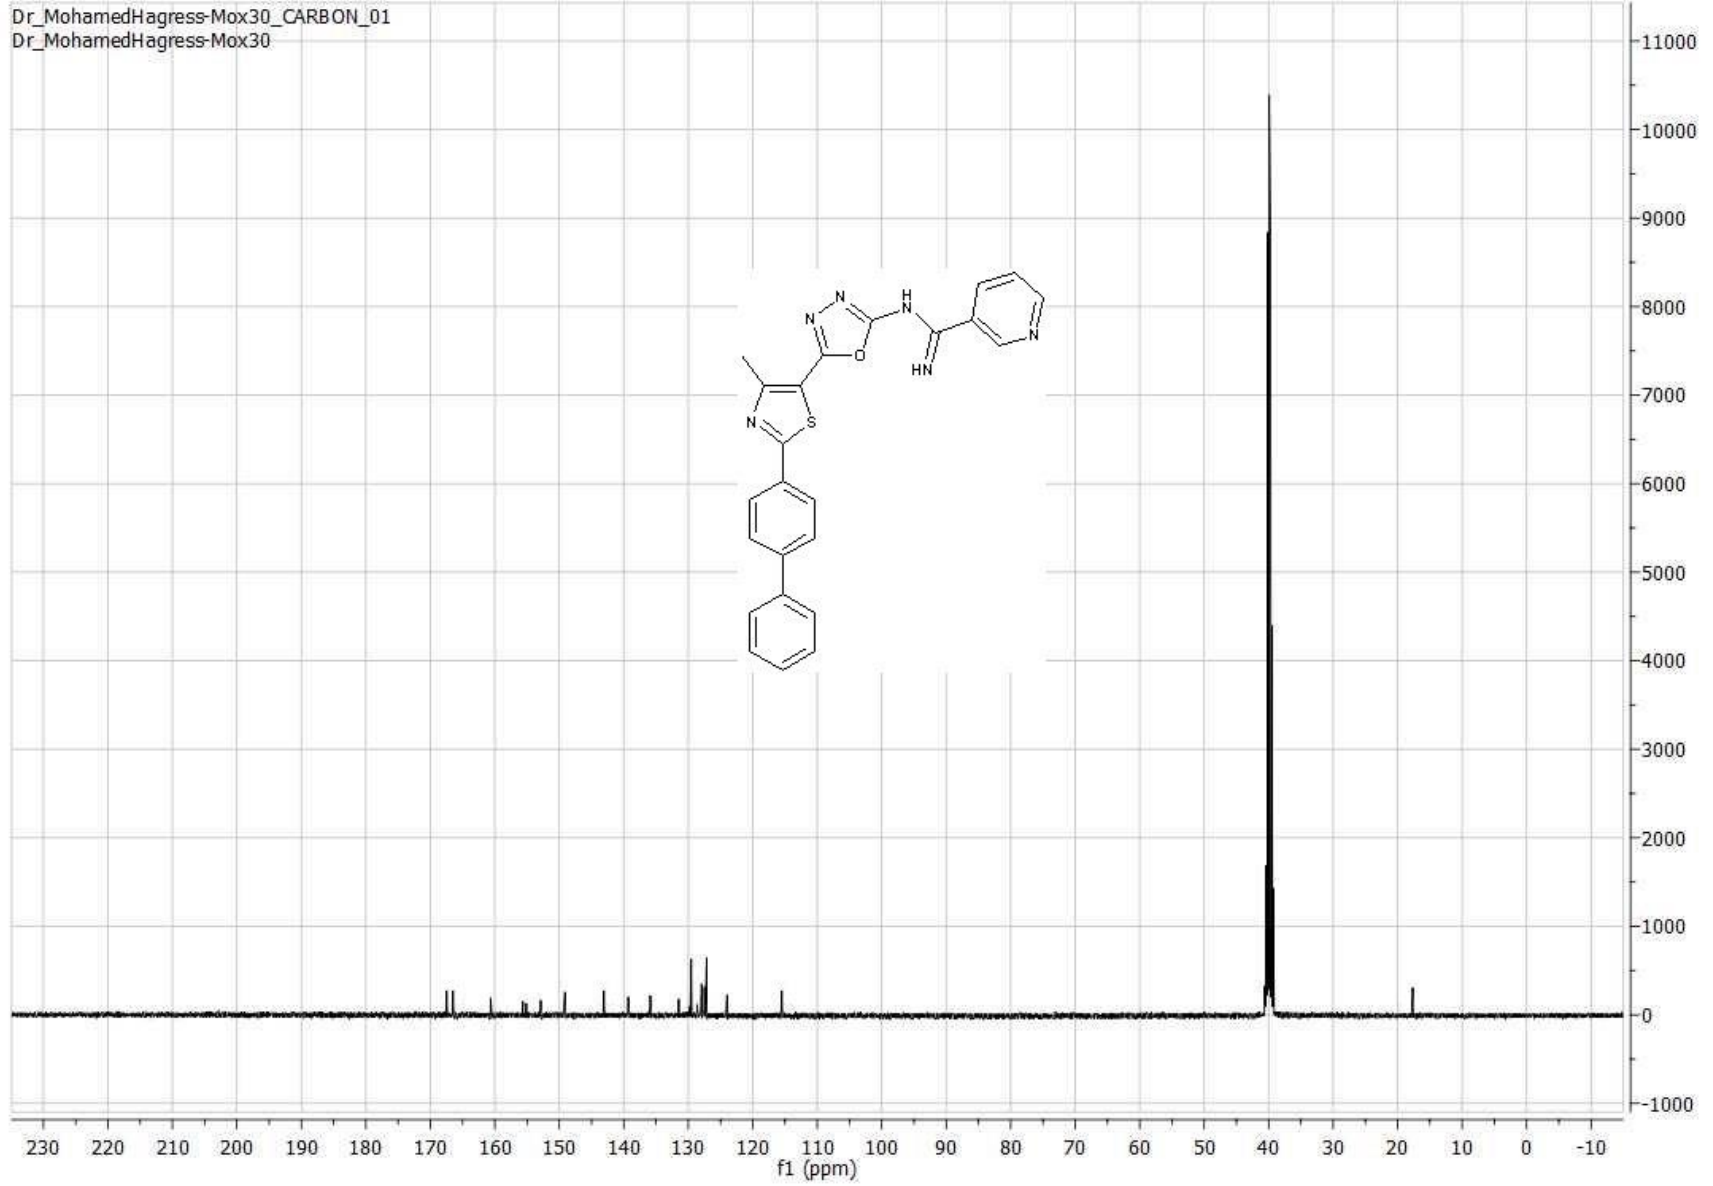

Dr\_MohamedHagrass-MOX31\_PROTON\_01  
Dr\_MohamedHagrass-MOX31

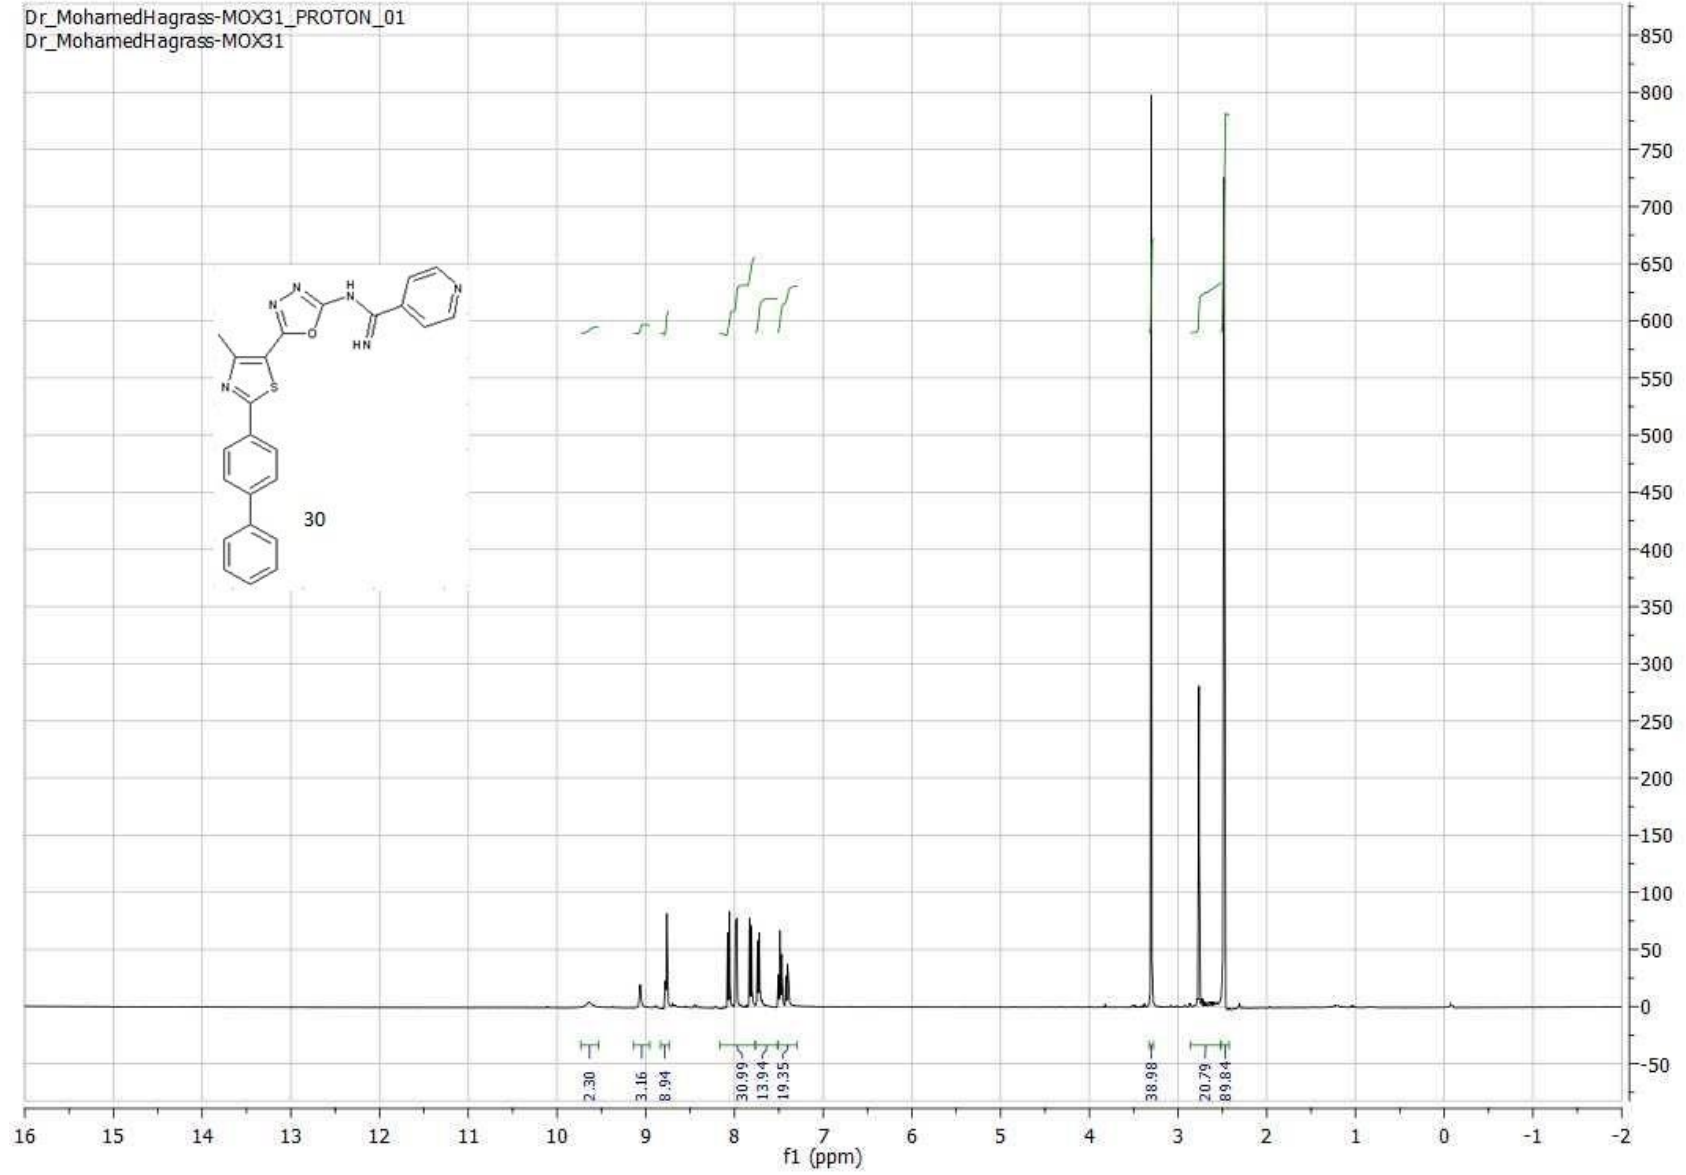

Dr\_MohamedHagress-Mox31\_CARBON\_01  
Dr\_MohamedHagress-Mox31

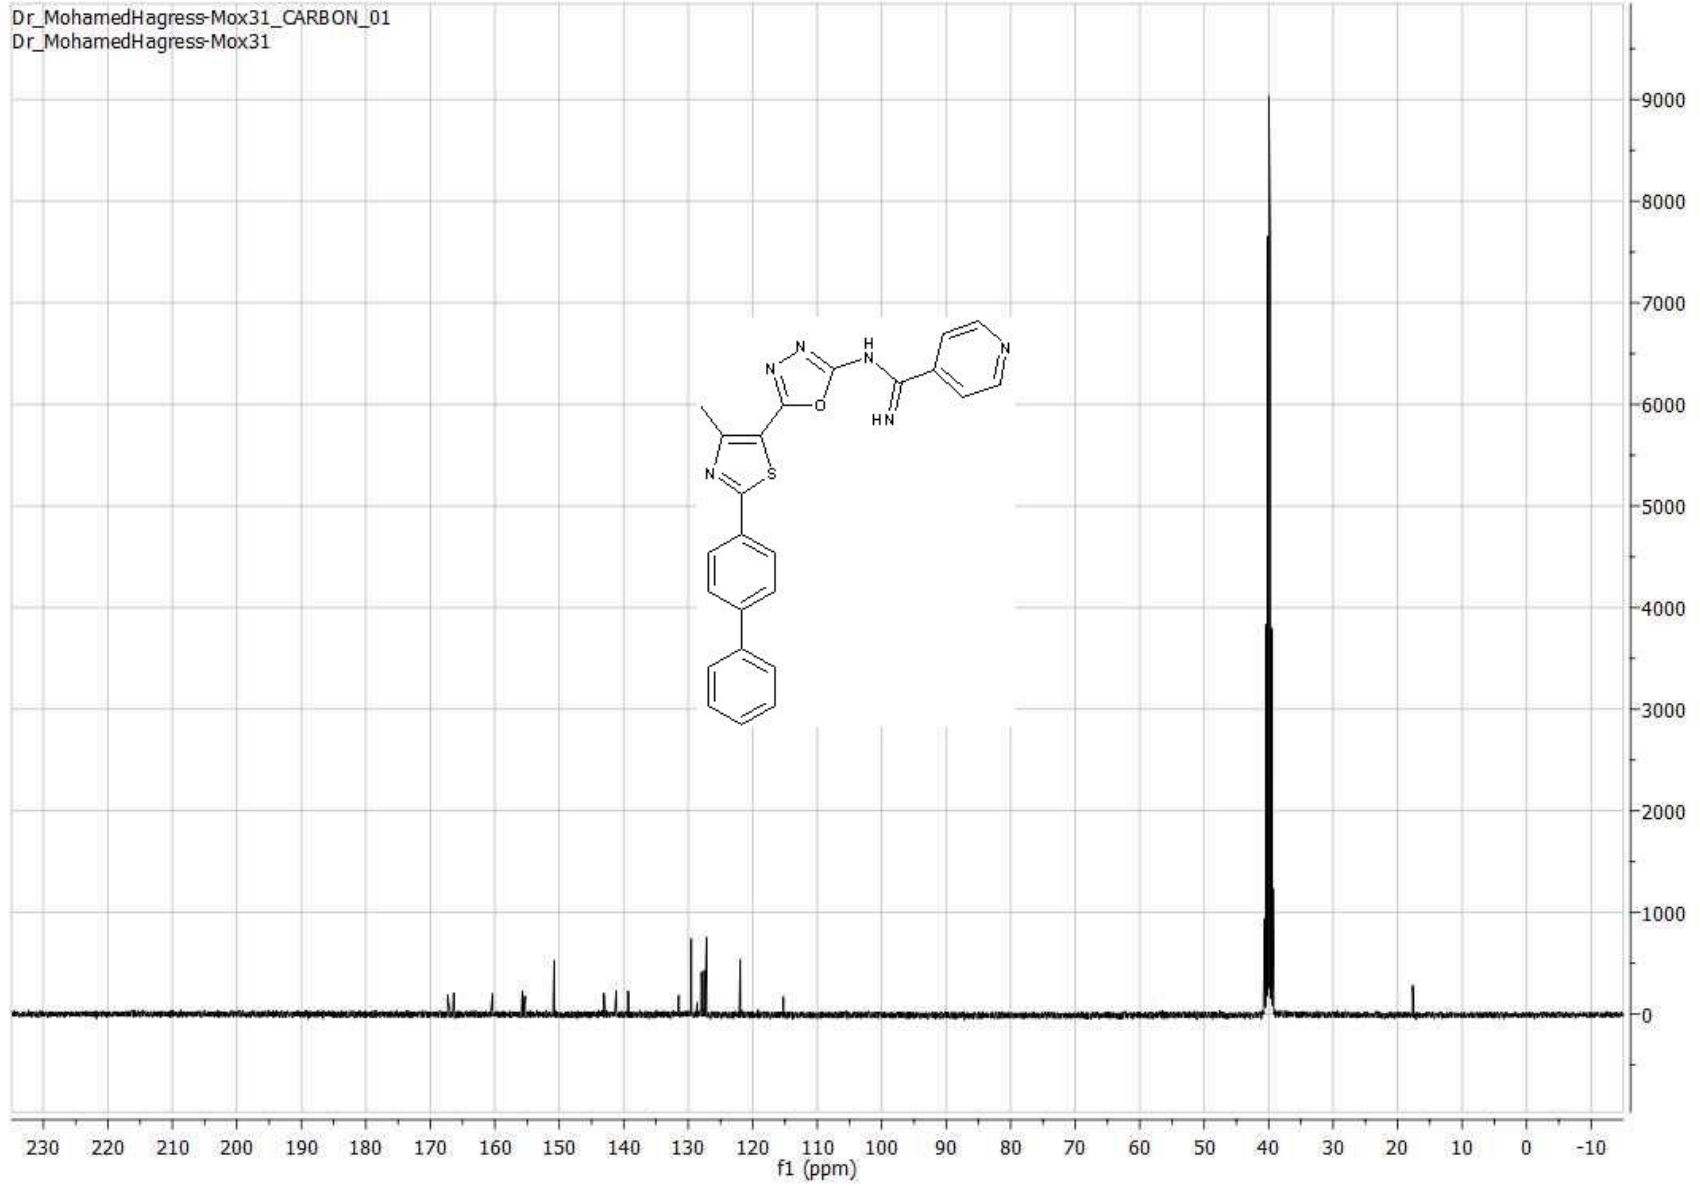

Supplement: NIHMS918769-supplement.pdf [file NIHMS918769-supplement.pdf]
